1           **Title: Modulation of neuronal resilience during aging by Hsp70/Hsp90/STI1 chaperone system**

2           Rachel E. Lackie<sup>1,2</sup>, Abdul R. Razzaq<sup>1,2</sup>, Sali M.K. Farhan<sup>3</sup>, Gilli Moshitzky<sup>4</sup>, Flavio H. Beraldo<sup>1,7</sup>,  
3           Marilene H. Lopes<sup>1,5</sup>, Andrzej Maciejewski<sup>1,6</sup>, Robert Gros<sup>1,7,8</sup>, Jue Fan<sup>1†</sup>, Wing-Yiu Choy<sup>6</sup>, David S.  
4           Greenberg<sup>4</sup>, Vilma R. Martins<sup>11</sup>, Martin L. Duennwald<sup>9,10†</sup>, Hermona Soreq<sup>4</sup>, Vania F. Prado<sup>1,2,7,10\*</sup>, Marco  
5           A.M. Prado<sup>1,2,7,10\*</sup>

6           <sup>1</sup>Molecular Medicine, Robarts Research Institute, <sup>2</sup>Program in Neuroscience, University of Western  
7           Ontario, Canada N6A 5B7, <sup>3</sup>Analytic and Translational Genetics Unit, Center for Genomic Medicine,  
8           Massachusetts General Hospital, Harvard Medical School, and The Stanley Center for Psychiatric Research,  
9           Broad Institute of MIT and Harvard, Boston, MA, USA 02114, <sup>4</sup>The Edmond and Lily Safra Center for Brain  
10          Sciences, Department of Biological Chemistry, The Alexander Silberman Institute of Life Sciences, The  
11          Hebrew University of Jerusalem, Jerusalem, Israel 91904, <sup>5</sup>Laboratory of Neurobiology and Stem cells,  
12          Department of Cell and Developmental Biology; Institute of Biomedical Sciences, University of Sao Paulo, Sao  
13          Paulo Brazil CEP 05508-900, <sup>6</sup>Department of Biochemistry, <sup>7</sup>Department of Physiology and Pharmacology,  
14          <sup>8</sup>Department of Medicine, <sup>9</sup>Department of Pathology and Laboratory Medicine, <sup>10</sup>Department of Anatomy &  
15          Cell Biology, Schulich School of Medicine and Dentistry, University of Western Ontario, London, Ontario,  
16          Canada N6A 5B7, <sup>11</sup>International Research Center, A.C. Camargo Cancer Center, São Paulo, Brazil 01508-010.

17           •       **Correspondence:**

18           Dr. Marco A.M. Prado

19           •       [mprado@robarts.ca](mailto:mprado@robarts.ca)

20           Dr. Vania F Prado

21           •       [vprado@robarts.ca](mailto:vprado@robarts.ca)

22  
23  
24           Robarts Research Institute  
25           1151 Richmond St. N, N6A 5B7  
26           The University of Western Ontario  
27           London, Ontario, Canada  
28           Tel: 519-9315777 Ext. 24888 or 24889  
29

30           **ABSTRACT**

31           Chaperone networks are dysregulated with aging and neurodegenerative disease, but whether  
32           compromised Hsp70/Hsp90 chaperone function directly contributes to neuronal degeneration is unknown.  
33           Stress-inducible phosphoprotein-1 (STI1; STIP1; HOP) is a co-chaperone that simultaneously interacts with  
34           Hsp70 and Hsp90, but whose function *in vivo* remains poorly understood. To investigate the requirement of  
35           STI1-mediated regulation of the chaperone machinery in aging we combined analysis of a mouse line with a  
36           hypomorphic *Stip1* allele, with a neuronal cell line lacking STI1 and in-depth analyses of chaperone genes in  
37           human datasets. Loss of STI1 function severely disturbed the Hsp70/Hsp90 machinery *in vivo*, and all client  
38           proteins tested and a subset of cochaperones presented decreased levels. Importantly, mice expressing a  
39           hypomorphic STI1 allele showed spontaneous age-dependent hippocampal neurodegeneration, with consequent  
40           spatial memory deficits. STI1 is a critical node for the chaperone network and it can contribute to age-  
41           dependent hippocampal neurodegeneration.

## 45 ***Introduction***

46 The heat shock proteins 70 (Hsp70) and 90 (Hsp90) are ubiquitously expressed molecular chaperones  
47 that promote folding and activation of proteins and are also involved in targeting misfolded or aggregated  
48 proteins for refolding or degradation (Lackie et al., 2017). Hsp70 binds indiscriminately to proteins in the early  
49 stages of translation and folding and help them to adopt and maintain native conformations. It also prevents  
50 aggregation and supports refolding of aggregated and misfolded proteins (Mayer, 2013). Hsp90 is mainly  
51 involved in a later stage of activation and supports the maturation and activation of a specific set of “client”  
52 proteins, many of which, such as steroid hormone receptors, kinases, and transcription factors, are involved in  
53 signaling (Picard, 2006; Taipale et al., 2012; Zhao et al., 2005).

54 In eukaryotes, both Hsp70 and Hsp90 are regulated by different co-chaperones that tune their activities  
55 (Ebong, Beilsten-Edmands, Patel, Morgner, & Robinson, 2016; Harst, Lin, & Obermann, 2005; Hildenbrand et  
56 al., 2011; J. Li, Richter, & Buchner, 2011). Client proteins are initially recruited by a complex formed between  
57 Hsp70 and its co-chaperone Hsp40 and are then transferred to Hsp90 with the help of the co-chaperone stress-  
58 inducible phosphoprotein 1 (See Figure 1, STI1, STIP1 or HOP for Hsp organizing protein in humans). STI1  
59 contains three tetratricopeptide repeat domains (TPR1, TPR2A and TPR2B); two of them bind to Hsp70 (TPR1  
60 and TPR2B) and one binds to Hsp90 (TPR2A) (Schmid et al., 2012a). STI1 has been shown to physically  
61 interact simultaneously with both chaperones and regulate their activity, facilitating the transfer of client  
62 proteins (Johnson, Schumacher, Ross, & Toft, 1998; C. T. Lee, Graf, Mayer, Richter, & Mayer, 2012; Rohl,  
63 Wengler, et al., 2015; Schmid et al., 2012a).

64 Besides its role in the client folding pathway, STI1 has been suggested to be involved in a number of  
65 different functions including shuttling of some proteins from the cytosol to the mitochondria (Hoseini et al.,  
66 2016); facilitating gene transcription by removing nucleosomes at target promoters (Floer, Bryant, & Ptashne,  
67 2008); and maintaining genome integrity by silencing transposons (Gangaraju et al., 2011; Karam, Parikh,  
68 Nayak, Rosenkranz, & Gangaraju, 2017). Furthermore, STI1 can be secreted by different cells, including  
69 astrocytes and microglia, and binding of extracellular STI1 to the prion protein triggers pro-survival signaling

70 cascades and prevents A $\beta$  toxicity in neurons (Linden et al., 2008; Lopes et al., 2005; Ostapchenko et al., 2013;  
71 Zanata et al., 2002).

72 Noteworthy, yeast cells null for STI1 are viable under optimal conditions (Chang, Nathan, & Lindquist,  
73 1997; Y. Song & Masison, 2005), but they are highly sensitive to Hsp90-inhibiting compounds and grow poorly  
74 under limiting conditions (Chang et al., 1997; Y. Song & Masison, 2005). In worms STI1 lacks the TPR1  
75 domain, but it is still functional and connects Hsp70/Hsp90 (Y. Song & Masison, 2005). *C. elegans* lacking  
76 STI1 are viable but are less resilient to stress and display reduced lifespan (Gaiser, Brandt, & Richter, 2009b).  
77 In contrast, knockout of STI1 in mice leads to embryonic lethality (Beraldo et al., 2013), indicating that in  
78 mammals the roles of STI1 are essential for life and cannot be compensated by other proteins. To note, during  
79 mouse development, STI1 co-chaperone activity seems to be a critical mechanism for the modulation of  
80 apoptosis and cellular resilience (Beraldo et al., 2013).

81 The chaperone machinery is essential for protein quality control and is thought to be particularly  
82 important in neurodegenerative disorders such as Alzheimer's, Parkinson's and Huntington's disease (Fontaine  
83 et al., 2016; Pratt, Gestwicki, Osawa, & Lieberman, 2015). In yeast, STI1 interaction with Hsp70 can redirect  
84 toxic amyloid-like proteins into cytosolic foci, thus increasing cellular viability (Wolfe, Ren, Trepte, & Cyr,  
85 2013). Remarkably, recent experiments in yeast suggest that excessive demand for chaperone activity can  
86 disturb chaperone function by decreasing STI1 interaction with members of the chaperone network (Farkas et  
87 al., 2018). Dysregulation of the Hsp70/Hsp90 chaperone network transcriptome is present in aging brains and in  
88 neurodegenerative disease (Brehme et al., 2014). However, whether STI1 and Hsp70/Hsp90 are required *in vivo*  
89 to maintain homeostasis in mammals during aging is unknown. To address this critical question, we engineered  
90 a mouse line with a STI1 hypomorphic allele that retained partial functionality allowing survival of mice to  
91 adulthood. We combined analyses of human genetic datasets, this novel hypomorphic mouse line and a  
92 CRISPR-Cas9 STI1 knockout neuronal cell line to understand the requirement of STI1 for the functionality of  
93 chaperone networks. Our experiments reveal that limiting STI1 function due to the hypomorphic STI1 allele  
94 strongly reduces neuronal resilience during aging, suggesting a mechanism by which compromised chaperone  
95 network function may contribute to neurodegeneration.

96

## 97 **Results**

98 *The  $\Delta TPR1$  hypomorphic allele is expressed at low levels but is sufficient for mouse survival.*

99 To investigate the relationship between STI1 and the chaperone network in mammals, we generated  
100 hypomorphic TPR1-deprived STI1 mice using the Cre/lox system to remove exons 2 and 3 of the STI1 gene  
101 (Fig. 2A). We focused on removing the TPR1 domain because STI1 TPR domains are well conserved from  
102 yeast to humans and the TPR1 domain is absent in *C. elegans*, yet the protein can still regulate Hsp70/Hsp90  
103 (Gaiser et al., 2009b). Moreover, we confirmed the recombination of the *Stip1* locus by genome sequencing  
104 (data not shown, see STI1-flox and  $\Delta TPR$  allele cartoon in Figure 2A). After recombination, we confirmed that  
105 the alternative translation initiation codon of the mutated mRNA lacks a neighboring Kozak consensus (Kozak,  
106 1986), which likely contributed to less efficient translation of  $\Delta TPR1$  protein.

107 Homozygous mutant STI1 mice ( $\Delta TPR1$  mice) were viable but they were born on a significant lower  
108 frequency than expected from a Mendelian distribution. That is, out of 488 pups born from breeding  
109 WT/ $\Delta TPR1$  to WT/ $\Delta TPR1$  mice, 154 (32%) were WT, 277 (57%) were WT/ $\Delta TPR1$ , and 57 (12%) were  $\Delta TPR$   
110 instead of 25%, 50% and 25% respectively ( $\chi^2=47.49$ ,  $df=2$ ,  $p<0.0001$ ). Interestingly, at embryonic day E17.5,  
111 the proportion of homozygous  $\Delta TPR1$  mutants was close to the expected Mendelian frequency of 25% (out of  
112 33 pups 3 (9%) were WT, 22 (67%) were WT/ $\Delta TPR1$ , and 8 (24%) were  $\Delta TPR1$ ;  $\chi^2 = 5.182$ ,  $df=2$ ,  $p=0.0075$ ),  
113 suggesting that the decreased Mendelian distribution we observed for  $\Delta TPR1$  mice was because pups were  
114 dying immediately after birth. Supporting this hypothesis,  $\Delta TPR$  mice showed a significantly higher mortality  
115 rate during the first month and 17.5% of the cohort died before 30 days of age, compared to 0.5% of  
116 WT/ $\Delta TPR1$  and 1.0 % of the WT siblings. Interestingly, survival rate of  $\Delta TPR1$  mice that lived through and  
117 after the first month was not different from that of WT/ $\Delta TPR1$  and WT mice (Fig. 2B).

118 Strikingly, one  *$\Delta TPR1$*  allele was able to rescue the early embryonic lethality of STI1 null mutants.  
119 Specifically, we bred  $\Delta TPR1$  females to heterozygous null mice for STI1 (STI1 WT/KO mice, (Beraldo et al.,  
120 2013) and observed that out of 21 pups born alive, two were  $\Delta TPR1$ /STI1KO (9.5%) while 19 were  
121  $\Delta TPR1$ /WT (90.5%) instead of 50% and 50% as expected from the Mendelian distribution. One of the

122  $\Delta$ TPR1/STIIKO pups died one day after birth and the other survived to adulthood. These data suggest that STII  
123 lacking TPR1 has the necessary ability to allow mammalian development to proceed. Because of their frailty we  
124 did not further proceed to obtain mice with only one  $\Delta$ TPR1 allele.

125 We used qPCR to determine mRNA expression for the mutated locus (Fig. 2C and D). Analysis with  
126 primers targeting exons 2 and 3 (Fig. 2A, these primers detect full length STII mRNA, but not  $\Delta$ TPR1-STII  
127 mRNA) showed 50% reduction in full-length STII mRNA levels in heterozygous mutants, whereas in  
128 homozygous mutants, full length STII mRNA was not detected in adult cortical tissue (Fig. 2C). Importantly,  
129 primers flanking exons 8 and 9 (Fig. 2A, which detect both full length and  $\Delta$ TPR1 STII mRNA) revealed that  
130 expression level of  $\Delta$ TPR1 STII mRNA in  $\Delta$ TPR1 mice was like that of STII full length mRNA in WT mice  
131 (Fig. 2D, one-way ANOVA,  $p=0.1022$ ).

132 Immunoblot analysis demonstrated that  $\Delta$ TPR1 mice lacked full length STII protein (66 kDa) and  
133 instead expressed a truncated protein with reduced molecular mass of 53 kDa (Fig. 2E). The deleted TPR1  
134 domain is predicted to be 12-13 kDa in size, hence the apparent molecular mass of the mutant protein equals the  
135 predicted molecular mass of STII (66 kDa) minus 13 kDa. We detected close to 80% reduction in mutant  
136 protein levels in  $\Delta$ TPR1 mice when compared to WT littermates (Fig. 2F,  $p<0.0001$ ). Control experiments  
137 demonstrated that our polyclonal antibody recognizes several epitopes on the STII protein, therefore excluding  
138 the possibility that the reduced levels of immunostaining observed were due to decreased binding of the  
139 antibody to deleted epitopes (Figure 2 G).

140 Two possibilities could explain decreased STII levels in  $\Delta$ TPR1 mice: 1) the  $\Delta$ TPR1 protein is unstable  
141 and therefore undergoes rapid degradation or 2) the  $\Delta$ TPR1 mRNA is poorly translated. Because the yeast  
142  $\Delta$ TPR1 protein is stable (Rohl, Toppel, et al., 2015; Rohl, Wengler, et al., 2015; Schmid et al., 2012b) and the *C.*  
143 *elegans* protein naturally lacks the TPR1 domain (Gaiser, Brandt, & Richter, 2009a; H. O. Song et al., 2009), it  
144 is unlikely that decreased levels of the  $\Delta$ TPR1 protein in mice is a consequence of instability. On the other  
145 hand, the mRNA generated after deletion of exons 2 and 3 was expected to be poorly translated. The 5' end of  
146 the STII mRNA, including the translational initiation codon, was preserved in the  $\Delta$ TPR1 mRNA, but a UGA

147 stop codon was created 18 nucleotides downstream of the initiation codon. Thus, only a 7 amino acid peptide  
148 would be expected to be generated when this canonical initiation codon is used. However, overlapping the  
149 newly created UGA codon there is an AUG that can work as an alternative initiation codon and generate the  
150  $\Delta$ TPR1 protein (Fig. 2A). Much less  $\Delta$ TPR1 protein is expected to be generated because of low efficacy of the  
151 alternative initiation codon. Sequencing analysis of the mutated *Stip1* locus and mRNA confirmed these  
152 changes. Regardless of the mechanism, the hypomorphic STI1 mice have a truncated STI1 protein that is  
153 expressed at low levels but provides sufficient activity for survival.

154 Noteworthy, while young  $\Delta$ TPR1 mice and WT littermate controls showed similar weight, adult  $\Delta$ TPR1  
155 mice gained less weight than WT littermate controls (Fig. 2H). To determine whether  $\Delta$ TPR1 mice showed any  
156 metabolic phenotype, we tested them on metabolic cages at 15-18 months of age. Mice were habituated to the  
157 metabolic cages for 16 h and data were collected over the following 24 h (Table 1). We observed that food  
158 intake was not significantly different between  $\Delta$ TPR1 mice and littermate controls, both during the light and the  
159 dark phases of the day, indicating that difference in weight was not due to decreased food intake. Likewise,  
160 water consumption was similar between both genotypes. On the other hand,  $\Delta$ TPR1 mice showed increased  
161 ambulatory daily activity when compared to WT littermate controls, mainly due to increased locomotion during  
162 the light cycle. Also,  $\Delta$ TPR1 mice showed a significant increase in total activity, which includes not only  
163 locomotion but also grooming, sniffing, tail flicking and rearing, both during the light and dark cycle (Table 1).  
164 The increased physical activity could explain the decreased body weight observed in  $\Delta$ TPR1 mice. Also, it  
165 could explain the higher volumes of oxygen consumption and carbon dioxide release observed in  $\Delta$ TPR1 mice  
166 during both the light and dark cycles (Table 1). Importantly, the elevated metabolic rate was not a consequence  
167 of increased production of heat [Energy expenditure (EE); Table 1]. Furthermore, no significant differences in  
168 respiratory exchange rate (RER), a parameter that reflects the relative contributions of carbohydrate and fat  
169 oxidation to total energy expenditure, were observed between  $\Delta$ TPR1 mice and littermate controls.

170  *$\Delta$ TPR1-STI1 does not affect mRNA and protein levels of Hsp70 and Hsp90 but affects a subset of*  
171 *Hsp70-Hsp90 interacting proteins and co-chaperones*

172 We tested whether Hsp90 and Hsp70 mRNA levels were changed in  $\Delta$ TPR1 mice but did not observe  
173 any difference among genotypes (Fig. 3A-B; Hsp90,  $p=0.18$ ; and for Hsp70,  $p=0.37$ ). We then tested whether  
174  $\Delta$ TPR1-STI1 affects expression levels of Hsp90 and Hsp70 proteins in aged (15-18-month-old) mice (Fig. 3C-  
175 F). We did not find any changes in Hsp90 protein levels (Fig. 3C-E,  $p=0.076$  for pan Hsp90;  $p=0.465$  for  
176 Hsp90 $\beta$ ). There was also no significant difference in Hsp70 levels when we compared controls and  $\Delta$ TPR1  
177 brain tissues (Fig. 3C and F,  $p=0.076$ ). Immunofluorescent labelling for STI1, Hsp70 and Hsp90 revealed that  
178 localization of Hsp90 (Fig. 3G) and Hsp70 (Fig. 3H) in  $\Delta$ TPR1 MEFs (passage 4) was not altered when  
179 compared to wild-type MEFs and there was no significant change in STI1 co-localization with these  
180 chaperones. Additionally, immunofluorescence confirmed that  $\Delta$ TPR1 levels in MEFs were reduced.

181 We also investigated the levels of different regulators of the heat shock response and co-chaperones  
182 known to interact with Hsp70 and Hsp90 in aged mice (Fig. 4). Levels of the transcription factor HSF1, a major  
183 regulator of the heat shock response that is modulated by Hsp90 (Dai et al., 2003), were not affected in  $\Delta$ TPR1  
184 brain tissue (Fig. 4A, B,  $p=0.30$ ). Likewise, levels of Hsp40 (Fig. 4A, C), a DnaJ protein that is a co-chaperone  
185 for Hsp70 and is present in the Hsp70-STI1 complex (Cyr, Lu, & Douglas, 1992; Frydman, Nimmegern,  
186 Ohtsuka, & Hartl, 1994; Morgner et al., 2015; Tsai & Douglas, 1996) was not significantly changed ( $p=0.61$ ).  
187 Levels of the peptidyl-prolyl isomerase (PPIase) FKBP51, an Hsp90 co-chaperone that is involved in the  
188 maturation of steroid hormone receptors and stabilization of Tau species (Barent et al., 1998; Dickey et al.,  
189 2007; Jinwal et al., 2010; Nair et al., 1997) was also normal (Fig. 4D and E,  $p=0.548$ ). Additionally, levels of  
190 the co-chaperones Aha1 ( $p=0.28$ ), p23 ( $p=0.311$ ) and Cdc37 ( $p=0.15$ ) were not affected in STI1 hypomorphic  
191 mouse tissue (Fig. 4F-I). These results indicate that important players in the Hsp70/Hsp90 chaperone network  
192 were not affected in  $\Delta$ TPR1 mice.

193 We extended our investigation to a number of proteins involved in Hsp70-Hsp90 network function or  
194 protein folding. The co-chaperone C-terminal Hsp70 Binding protein (CHIP), a ubiquitin E3 ligase that targets  
195 clients for degradation, showed 40% reduction in heterozygous and  $\Delta$ TPR1 mouse brain compared to littermate  
196 controls (Fig. 4J and K,  $p=0.0014$ ). We also investigated Pin1, a peptidyl-prolyl cis/trans isomerase (PPIase)



197 that works with the Hsp90 complex and is important for regulating tau phosphorylation (Dickey et al., 2007). In  
198  $\Delta$ TPR1 mice, Pin1 showed 50% reduction in both heterozygous and  $\Delta$ TPR1 brains compared to littermate  
199 controls (Fig. 4J, L,  $p < 0.0001$ ). Cyclophilin A (CypA), another PPIase, presented 75% reduction in protein  
200 levels in heterozygous and  $\Delta$ TPR1 brains (Fig. 4M, N,  $p = 0.0004$ ). We found no significant changes in mRNA  
201 expression for any of these genes in the brain of  $\Delta$ TPR1 mice (Mean  $\pm$  SEM for Fkbp5: WT  $1.1 \pm 0.24$  and  
202  $\Delta$ TPR1  $0.71 \pm 0.12$ ,  $p = 0.26$ ; CHIP: WT  $1.0 \pm 0.10$  and  $\Delta$ TPR1  $0.77 \pm 0.07$ ,  $p = 0.08$ ; Pin1: WT  $1.0 \pm 0.16$  and  
203  $\Delta$ TPR1  $0.77 \pm 0.06$ ,  $p = 0.19$ ; CypA: WT  $1.0 \pm 0.08$  and  $\Delta$ TPR1  $0.78 \pm 0.08$ ,  $p = 0.11$ ), suggesting the possibility  
204 of disturbed proteostasis. Unexpectedly, these results indicate that STI1 is an important regulator of the stability  
205 of a group of Hsp90 regulators and co-chaperones involved in the Hsp70-Hsp90 chaperone network. Strikingly,  
206 the effect observed was as pronounced in heterozygous mice, that express approximately 50% of WT-STI1 plus  
207 10%  $\Delta$ TPR1-STI1 (compared to controls), as it was in  $\Delta$ TPR1 mice that express only 20% of  $\Delta$ TPR1-STI1.

208 As abnormal STI1 activity could alter gene expression (Gangaraju et al., 2011; Karam et al., 2017;  
209 Sawarkar, Sievers, & Paro, 2012), we performed unbiased RNA-sequencing analysis, to test whether general  
210 transcriptome changes in mutant mice could contribute to brain phenotypes. Long RNA-sequencing was  
211 performed on 5 cortical samples from STI1 homozygous  $\Delta$ TPR1 mice and 5 wild-type littermate controls. RIN  
212 values for these samples ranged between 8.2 and 8.7. Illumina sequencing yielded an average of 797,963 reads  
213 per sample, with 93.69% reads mapping rate to the mouse genome. We confirmed the complete absence of STI1  
214 exons 2 and 3 on  $\Delta$ TPR1 samples compared to wild-type control tissues (data not shown). Principal component  
215 analysis and sample distance matrix analyses did not segregate between the two groups, indicating only minimal  
216 differences between the two genotypes at the transcriptome level (Supplementary Fig. 1A, B). Furthermore,  
217 RNA sequencing analysis did not reveal any significant changes in transcripts passing FDR correction ( $p < 0.05$ ).  
218 Hence, it is unlikely that large general transcriptome changes contributed to phenotypes in  $\Delta$ TPR1 mice.

#### 219 *$\Delta$ TPR1-STI1 affects the levels of Hsp70/Hsp90 client proteins*

220 To test whether the function of the Hsp70/Hsp90 chaperone network was intact in  $\Delta$ TPR1 mice we  
221 investigated the levels of Hsp90 clients in 15-18-month-old brain tissue from  $\Delta$ TPR1 mice. We tested for

222 glucocorticoid receptor (GR), Tau protein and G protein-coupled receptor kinase 2 (GRK2), all of which are  
223 classical Hsp90 client proteins. Although qPCR analysis showed that mRNA levels for these three classical  
224 Hsp90 clients were not altered in the cortex of  $\Delta$ TPR1 mice (unpaired t-tests, Mean  $\pm$  SEM for GR: WT  $1.0 \pm$   
225  $0.09$  and  $\Delta$ TPR1  $0.91 \pm 0.08$ ,  $p=0.41$ ; for Tau: WT  $1.0 \pm 0.19$  and  $\Delta$ TPR1  $0.86 \pm 0.06$ ,  $p=0.55$ , for GRK2: WT  
226  $1.0 \pm 0.16$  and  $\Delta$ TPR1  $0.83 \pm 0.05$ ,  $p=0.28$ ), immunoblot analyses showed that protein levels of all of these  
227 Hsp90 client proteins were very sensitive to reduced STI1 activity. GR was greatly decreased even in  
228 heterozygous  $\Delta$ TPR1 tissue (Fig. 5A and B,  $p<0.0001$ ). Immunofluorescence experiments further confirmed  
229 that GR levels were decreased in neurons, without changes in GR localization (Fig. 5C). Total Tau was also  
230 reduced by immunoblotting analysis (Fig. 5D, E,  $p<0.005$ ). Likewise, GRK2 was reduced in heterozygous and  
231 homozygous  $\Delta$ TPR1 mice (Fig. 5D, F,  $p<0.01$ ). As observed for the Hsp70-Hsp90 network modulators, the  
232 deficit on the stability of the different client proteins was as pronounced in heterozygous mice as it was in  
233  $\Delta$ TPR1 mice.

234 We also tested whether changes in the Hsp70/Hsp90 chaperone network observed in the cortex were  
235 observed in other brain tissues by examining hippocampal samples for the level of GR (a client representative)  
236 and Pin1 (a co-chaperone representative). As observed in the cortex, immunoblot analysis of the hippocampus  
237 showed reduction in GR levels in both heterozygous and homozygous  $\Delta$ TPR1 mutants (Fig. 5 G-H,  $p<0.005$ ;  
238 WT vs HET  $\text{adjp}=0.016$ , and  $\text{adjp}=0.002$  for WT vs  $\Delta$ TPR1 comparison). Likewise, Pin1 was also significantly  
239 reduced (Fig. 5 G and K, WT vs HET  $\text{adjp}=0.013$ , and WT vs  $\Delta$ TPR1  $\text{adjp}=0.036$ ). Immunofluorescence  
240 analysis also showed reduction of GR in CA3 (Fig. 5J) and CA1 hippocampal neurons (Fig. 5K) and confirmed  
241 that GR localization was not affected. These results suggest that the role of STI1 on the modulation of the  
242 Hsp70/Hsp90 chaperone network is likely identical in different neurons and brain regions.

243 *Hsp70-Hsp90 chaperone network dysfunction observed in  $\Delta$ TPR1 mice mimics loss of STI1 function.*

244 To test whether the changes we observed in  $\Delta$ TPR1 mice are reminiscent of loss of STI1 function, we  
245 generated a neuronal cell line lacking STI1, as STI1-KO embryos and STI1-KO MEFs are not viable (Beraldo  
246 et al., 2013). We used CRISPR-Cas9 technology to generate SN56-STI1-KO cells (Fig. 6) and tested them for  
247 the levels of different members of the Hsp70-Hsp90 chaperone network. Similar to what we observed for the

248  $\Delta$ TPR1 mice, levels of Hsp90 and Hsp70 did not differ between SN56-STI1-KO and control cells (Fig. 6 A–D,  
249 panHsp90,  $p=0.70$ ; for Hsp70,  $p=0.70$ ). Likewise, levels of the client proteins GR and GRK2 were significantly  
250 decreased in SN56-STI1-KO cells when compared to control cells (Fig. 6E, F, I, GR,  $p=0.0023$ ; for GRK2,  
251  $p=0.0006$ ). The co-chaperones CHIP (Fig. 6E, G,  $p=0.0034$ ), and CypA (Fig. 6H, K,  $p=0.0017$ ) were also  
252 significantly decreased in SN56-STI1-KO cells. Furthermore, levels of the co-chaperone FKBP51 were not  
253 altered (Fig. 6H, J,  $p=0.29$ ). Noteworthy, transfection of SN56-STI1-KO cells with STI1-HA rescued the levels  
254 of GR (Fig. 6L–M, one way ANOVA, KO-HA vs KO-STI1-HA  $\text{adj}p=0.0006$ ), Pin1 (Fig. 6L and 6N, KO-HA  
255 vs KO-STI1-HA  $\text{adj}p=0.0042$ ) and CypA (Fig. 6L and 6P KO-HA vs KO-STI1-HA  $\text{adj}p=0.018$ ), further  
256 supporting the notion that the Hsp70/Hsp90 chaperone network dysfunction observed in these STI1-KO cells is  
257 dependent on STI. Interestingly, levels of CHIP were not altered by STI1-HA transfection (Fig. 6L and 6O,  
258 KO-HA vs KO-STI1-HA  $\text{adj}p=0.72$ ). These results indicate that the Hsp70-Hsp90 chaperone network  
259 dysfunction we observed in  $\Delta$ TPR1 mice strongly mimics the loss of STI1, suggesting that Hsp90/Hsp70  
260 chaperone network is highly dependent on STI1 functional levels.

### 261 *STI1 and co-chaperone loss of function in humans*

262 Our experiments demonstrate that perturbation of STI1 function in mice decreases client protein levels  
263 and also impacts a number of Hsp90 regulatory proteins, some of which have not been directly linked to STI1  
264 modulation. To determine whether similar constraint is found in humans for *STI1* and members of the Hsp90  
265 machinery, we determined the frequency of variation in *STI1* in healthy individuals using public databases,  
266 combining genetic information from thousands of exomes and genomes such as ExAC (60,706 individuals) and  
267 gnomAD (138,632 individuals) (Lek et al., 2016). We observed 1 and 4 heterozygous *STI1* protein truncating  
268 variants (PTVs) carriers in ExAC and gnomAD, respectively, at a frequency of  $\ll 0.001\%$  (Supplementary  
269 Table 1). In comparison, *HSP90AA1* presented 8 and 22 PTVs in ExAC and gnomAD, respectively, i.e. at a 10-  
270 fold higher frequency of  $<0.01\%$  than *STI1* (Supplementary Table 1). The *STI1* pLI score, which reflects the  
271 probability that a given gene does not tolerate loss-of-function variation was 1, suggesting that *STI1* loss-of-  
272 function is most likely not tolerated in humans or may result in a disease phenotype (Lek et al., 2016). In  
273 comparison, the pLI score of *HSP90AA1*, the stress inducible Hsp90 allele ( $\alpha$  isoform), was 0.68, suggesting

274 that PTVs may be tolerated in *HSP90AA1*. This is likely due to compensation by the highly redundant  
275 *HSP90AB1*, the constitutive Hsp90 ( $\beta$ ) isoform. Interestingly, the *HSP90AB1* pLI score is 1. These analyses  
276 mirrored the survival of STI1, Hsp90 $\alpha$  and Hsp90 $\beta$  knockout mice (Beraldo et al., 2013; Grad et al., 2010;  
277 Voss, Thomas, & Gruss, 2000). Whereas Hsp90 $\alpha$  knockout mice survive to adulthood (Grad et al., 2010), both  
278 STI1 and Hsp90 $\beta$  gene ablation causes embryonic lethality (Beraldo et al., 2013; Voss et al., 2000).

279 We extended our analysis to other Hsp90 co-chaperones that are affected by changes in STI1 levels to  
280 determine whether they may be redundant in mammals. We did so by comparing human genetic data with  
281 viability of published knockout mice. This analysis is summarized in Table 2. Supplementary Table 1 tabulates  
282 the observed PTVs, SNVs, indels, CNVs, and associations, providing a comprehensive summary of the human  
283 genes investigated using publicly available datasets of healthy controls and disease-ascertained individuals.  
284 Taken together, our analysis suggests that constitutive Hsp90, STI1, CDC37, Aha1 and p23 are essential in  
285 mammals, indicating that some co-chaperones (such as STI1, Aha1 and p23), which are otherwise not essential  
286 in yeast (Sahasrabudhe, Rohrberg, Biebl, Rutz, & Buchner, 2017), may provide more sophisticated regulation in  
287 mammals.

#### 288 *Decreased STI1 activity compromises viability of cultured cells*

289 Given that disturbed STI1 activity in mammalian cells interferes with different aspects of the  
290 Hsp70/Hsp90 chaperone machinery, we tested whether STI1 protects neuronal cells from environmental stress.  
291 In normal conditions, SN56-STI1 KO cells examined using the Live/Dead staining assay showed decreased  
292 survival when compared to WT controls (Fig. 7A,  $p < 0.0001$ ). Moreover, SN56-STI1 KO cells presented  
293 increased sensitivity to thapsigargin, which induces ER stress (Fig. 7B, two-way ANOVA significant effect of  
294 genotype,  $p < .0001$ ; significant effect of treatment,  $p < .0001$ ). Similarly,  $\Delta$ TPR1 MEF cultures showed decreased  
295 survival when compared to WT MEFs (Fig. 7 C&D,  $p = 0.018$ ). In addition,  $\Delta$ TPR1 MEFs presented decreased  
296 cell proliferation when compared to WT MEFs (Fig. 7 E&F,  $p < 0.0005$ ).

#### 297 *Impaired STI1 activity leads to age dependent decrease in the number of hippocampal neurons*

298 Because our results showed that decreased STI1 activity compromises cellular resilience and  
299 proliferation in cultured cells, we tested whether STI1 activity is required to maintain healthy hippocampal

300 neurons *in vivo*. We choose to study hippocampal neurons because they show increased vulnerability to a  
301 number of protein misfolding diseases (Adamowicz et al., 2017; Beyer et al., 2013; Kalaitzakis et al., 2009) and  
302 aging (Gemmell et al., 2012; Kuhn, Dickinson-Anson, & Gage, 1996; J. S. Li & Chao, 2008; Padurariu,  
303 Ciobica, Mavroudis, Fotiou, & Baloyannis, 2012). To evaluate neuronal resilience in old  $\Delta$ TPR1 mice (15-18-  
304 month-old) we initially used silver staining. Silver is increasingly taken up by degenerating neurons, axons or  
305 terminals (Chen et al., 2008; Kolisnyk et al., 2016; Zhou et al., 2010). There was no difference between  
306 genotypes in silver staining in the dentate gyrus of 15-18-month-old mice (Fig. 8A and B,  $p=0.12$ ). However,  
307 we detected a significant increase in silver staining in the CA1 region of  $\Delta$ TPR1 mice (Fig. 8C and D,  $p=0.01$ ).  
308 In the CA3 region of  $\Delta$ TPR1 mice, silver staining showed a tendency to be increased but changes did not reach  
309 significance (Fig. 8E-H, CA3,  $p=0.07$ ). Nonetheless, CA3 sub-regions images suggested that neuronal layers  
310 (arrows) were altered in older  $\Delta$ TPR1 mice, suggesting the possibility that at this age the CA3 region was  
311 already severely affected by neuronal loss.

312 To further investigate neuronal survival/viability in the CA3 region of  $\Delta$ TPR1 mice, we stained the  
313 hippocampus of control and  $\Delta$ TPR1 mice with NeuN, a marker of mature neurons, and counted neurons in  
314 different sub-regions. Young (3-5 month)  $\Delta$ TPR1 mice showed no difference in the number of CA3 neurons  
315 across all subfields when compared to WT controls (Fig. 9A-D, CA3a  $p=0.22$ ; for CA3b  $p=0.22$ , CA3c  
316  $p=0.15$ ). Likewise, no differences were found in CA1 region at young age (data not shown). In contrast, at 15-  
317 18 months of age, thinning of the CA3 region was obvious. Across the whole CA3, there were significantly less  
318 neurons in  $\Delta$ TPR1 mutants compared to controls (Fig. 9E-H, CA3a  $p=0.01$ ; for CA3b  $p=0.005$ ; for  $p=0.002$ ).  
319 Interestingly, we compared STI1 levels in the hippocampus of 4 and 15-month-old control WT mice and  
320 observed a significant decrease with age (Fig. 9 I-J,  $p=0.025$ ). Likewise, the CA1 region had significant  
321 reduction in neuron count (data not shown,  $p=0.002$ ). As levels of the hypomorphic  $\Delta$ TPR1-STI1 protein are  
322 already low in  $\Delta$ TPR1 mice at young age, a further decrease may augment the stress to the chaperone system in  
323 hippocampal neurons, promoting degeneration.

#### 324 *Spatial memory recall deficits in $\Delta$ TPR1 mice*

325 Numerous studies implicate the CA3 region in spatial memory (Farovik, Dupont, & Eichenbaum, 2010;  
326 I. Lee, Jerman, & Kesner, 2005; J. S. Li & Chao, 2008; Steffenach, Sloviter, Moser, & Moser, 2002). To  
327 determine the functional consequence of the age dependent degeneration of hippocampal neurons, we measured  
328 performance of old  $\Delta$ TPR1 mice in the spatial version of the Morris water maze (MWM). No difference  
329 between genotypes was observed in the learning phase of the task over the four days of training: on each day of  
330 training animals took less time to reach the platform (Fig. 10A,  $p < 0.001$ ). On the other hand, animals from both  
331 genotypes took similar time to reach the target each day ( $p = 0.30$ ). Also, on each day of training, mice swam a  
332 shorter distance to reach the platform (Fig. 10B,  $p < 0.001$ ), and both genotypes swam a similar distance each  
333 day to reach the platform ( $p = 0.88$ ). Interestingly, the speed of  $\Delta$ TPR1 mice was slightly but significantly lower  
334 than that of WT controls (Fig. 10C,  $p = 0.02$ ). These results indicate that both genotypes were able to learn the  
335 MWM task. However, on the probe trial day (fifth day),  $\Delta$ TPR1 mice showed no preference for the target  
336 quadrant of the pool (Fig. 10D), while control mice spent significantly more time in the target quadrant than in  
337 the other quadrants. These results indicate that while control mice clearly remembered where the platform  
338 should be,  $\Delta$ TPR1 mice did not seem to retrieve this information. In summary, we observed significant  
339 degeneration of CA1 and profound loss of CA3 neurons in  $\Delta$ TPR1 mice that was accompanied by a selective  
340 deficit in spatial memory.

### 341 ***Discussion***

342 STI1 is a highly conserved co-chaperone that plays a critical role in mediating interactions  
343 between Hsp70 and Hsp90 in the chaperone network. By taking advantage of a new hypomorphic STI1 allele in  
344 mice to understand the consequences of decreased STI1 activity/expression in the mammalian brain *in vivo*, we  
345 reveal that STI1 is a master controller of the chaperone network required to maintain stability of Hsp90 client  
346 proteins and several Hsp90 auxiliary co-chaperones in the mammalian brain. In depth RNA-Seq data and  
347 analysis of client proteins support the notion that STI1 activity regulates client levels by proteostasis, rather than  
348 by transcriptome modulation. Although the interpretation of these data needs to account for both, reduced levels  
349 of STI1 and the deletion of the TPR1 domain, the similarities between changes in clients, co-chaperones and

350 decreased resilience between the STI1-KO SN56 cells and the  $\Delta$ TPR1 mouse line, suggest that the results from  
351 this mouse line are likely due to overall decreased STI1 function.

352 Our analyses indicate that, in the mouse brain, proper function of the Hsp70/Hsp90 chaperone network  
353 is highly dependent on STI1 expression levels and that there is an interaction between STI1 levels and aging.  
354 The requirement for high levels of functional STI1 may be linked to the high levels of Hsp90, which accounts  
355 for 1-2% of total cellular protein in unstressed mammalian cells. Interestingly, during stress conditions, when  
356 Hsp90 levels can rise up to 4% of total cellular protein, STI1 is one of the few co-chaperones noticeably  
357 induced (Nicolet & Craig, 1989). In addition, increased levels of STI1 in a BAC transgenic mouse line is linked  
358 to augmented Hsp90 levels (Beraldo et al., 2013).

359 Deletion of STI1 in yeast has been shown to affect Hsp90 clients, including GR activity (but not levels)  
360 and conformation of v-Src kinase (Sahasrabudhe et al., 2017). On the other hand, other Hsp90 clients were not  
361 affected by elimination of STI1 in yeast (Sahasrabudhe et al., 2017). In contrast, in the mouse brain we found  
362 that the levels of a number of known Hsp90 client proteins, such as GR, Tau, and GRK2 were all dependent on  
363 STI1. These differences in client specificity between mammalian and yeast STI1 highlights the increased  
364 dependence of mammalian cells on regulation by co-chaperones. Our results also revealed that stability of  
365 accessory proteins with PPIase activity as well as stability of the E3 ligase CHIP are significantly reduced in  
366  $\Delta$ TPR1 mouse brain and in SN56-STI1 KO cells. Additionally, our human dataset analyses revealed that indeed  
367 co-chaperones such as p23 and STI1, which are not required for yeast survival, are essential in humans. Thus,  
368 our analysis provides, to the best of our knowledge, one of the first in depth surveys of tolerability for loss of  
369 function for different co-chaperones in mammals.

370 Chaperone networks have been shown to be dysregulated with age, and changes in chaperone levels in  
371 *C. elegans* can affect phenotypes due to protein misfolding (Brehme et al., 2014; H. O. Song et al., 2009; Y.  
372 Song & Masison, 2005). In *C. elegans*, KO of STI1 reduces lifespan (H. O. Song et al., 2009) and increases  
373 toxicity of Alzheimer's related proteins (Brehme et al., 2014). Additionally, sequestration of chaperones has  
374 been observed in neurodegenerative diseases in which  $\alpha$ -synuclein accumulates (Ebrahimi-Fakhari, Saidi, &  
375 Wahlster, 2013) and a recent transcriptome analysis revealed STI1 as one of many genes dysregulated in some

376 rapidly progressing Lewy body dementia patients (Santpere et al., 2018). This sequestration of chaperones and  
377 co-chaperones could ultimately impair their ability to guide protein folding and maturation, thereby increasing  
378 protein aggregation, toxicity and neurodegeneration.

379 The hippocampus is one brain region particularly vulnerable to environmental stress, protein  
380 aggregation and neurodegeneration (Padurariu et al., 2012; Robitsek, Ratner, Stewart, Eichenbaum, & Farb,  
381 2015; Steffenach et al., 2002). Hippocampal CA3 neurons support spatial memory (Gilbert & Brushfield, 2009)  
382 due to their excitatory and modifiable connections with the dentate gyrus and CA1 regions. Damage to the CA3  
383 region has been shown to produce deficits in spatial memory (I. Lee et al., 2005; J. S. Li & Chao, 2008;  
384 Steffenach et al., 2002). We found that hippocampal neurons in the CA1 region show increased features related  
385 to degeneration. Most remarkably, we found a pronounced age-dependent loss of CA3 neurons. In agreement  
386 with loss of CA3 neurons we found that spatial memory recall in  $\Delta$ TPR1 mice is severely compromised. The  
387 profound and widespread alteration in Hsp90 client proteins, including GR and other critical proteins involved  
388 in neuronal resilience/function, may be critical for the phenotypes observed in  $\Delta$ TPR1 mice. However, whether  
389 these effects of STI1 in neurons are cell autonomous or non-cell autonomous will need to be further  
390 investigated (Lackie et al., 2017). Future experiments using conditional approaches to mutate STI1 in neurons  
391 or glia are warranted to explore these mechanisms.

392 In complement with our findings of decreased resilience in aging cells with compromised  
393 Hsp70/Hsp90/STI1, recent experiments have shown that partial inhibition of the Hsp90 system can increase life  
394 span in a mouse model of aging, by killing cells with a senescent phenotype that contribute to overall organism  
395 inflammation and cellular stress (Fuhrmann-Stroissnigg et al., 2017). Our experiments demonstrated that STI1  
396 might be exploited as a key inhibitor of the Hsp90 system to influence a host of client proteins in the  
397 mammalian brain and could be used to modulate Hsp90 activity efficiently. Overall, it will be critical to find a  
398 balance between chaperone network activity that allows neurons to cope with increased stress of aging and still  
399 allow for proper disposal of damaged or senescent cells, which may be particularly reliant on Hsp90 activity to  
400 maintain proteostasis for survival (Rodina et al., 2016).

## 401 *CONCLUSIONS*



402 Our results illuminate a requirement for optimal STI1 activity to maintain healthy hippocampal aging in  
403 mammals. Mechanistically, reduced STI1 levels can affect the efficient transfer of clients between  
404 Hsp70/Hsp90, reducing their stability, but it can also affect signalling in neurons. Our results significantly  
405 extend the knowledge about STI1 functions, centering this protein as a master regulator of chaperone activity,  
406 having an essential role for proteostasis of Hsp70/Hsp90/STI1 client proteins and survival of selective neuronal  
407 populations.

## 408 ***Material and Methods***

### 409 **Mouse line generation**

410 We used Cre/loxP technology to generate mice expressing the hypomorphic *Stip1* allele lacking the  
411 TPR1 domain ( $\Delta$ TPR1). Genetically-modified mice were generated by Ozgene (Perth, Australia) on a  
412 C57BL/6J ES genetic background using standard homologous recombination techniques. In short, an FRT-  
413 flanked PGK-neomycin cassette was inserted upstream of exon 2. LoxP sites were inserted upstream of the  
414 selection cassette and downstream of exon 3. The construct was electroporated into embryonic stem (ES) cells  
415 from C57BL/6J mice and targeted ES cells were injected into C57BL/6J blastocysts. Chimeric mice obtained  
416 were crossed to C57BL/6J mice to generate STI1-flox mice. To remove the selection cassette, STI1-flox mice  
417 were crossed to OzFlpE, a knock-in line that contains the FlpE variant of the *Saccharomyces cerevisiae* FLP1  
418 recombinase at the Rosa26 locus. Mice that had the selection cassette deleted were backcrossed to C57BL/6J to  
419 remove FlpE. The  $\Delta$ TPR1 mice were obtained by crossing STI1-flox to OzCre mice (PGK-Cre at the Rosa26  
420 locus), which allowed for germline deletion of exons 2 and 3. Backcrossing to C57BL/6J allowed the removal  
421 of the Cre transgene. Male mice were used for all experiments.

### 422 **Ethics Statement**

423 Animals were housed and maintained at The University of Western Ontario by the Animal Care and  
424 Veterinary Services. Animals were used as outlined in our Animal Use Protocols (2016-103; 2016-104), which  
425 adhered to the Canadian Council of Animal Care (CCAC) guidelines. Animals were housed with 3-4  
426 littermates/cage, and had ad libitum access to food (Harlan, Indianapolis, IN, USA) and water in standard  
427 plexiglass cages in a room with light/dark cycle from 7am-7pm in temperature and humidity-controlled rooms

428 (22-25°C, with 40-60% humidity). Animals were regularly monitored by Animal Care and Veterinary Services  
429 Staff and by the researchers and technicians in the lab.

### 430 **Mouse embryonic fibroblast (MEF) culture**

431 MEF cultures were generated as previously described (Beraldo et al., 2013; Migliorini et al., 2002).  
432 Heterozygous breeding pairs were used and E13.5 embryos were collected and isolated for culture, with 3-5  
433 embryos/genotype being collected for each experiment. Embryos were dissected in Hanks Balanced Salt  
434 Solution on ice. Head and liver were excluded, and all other tissues were used to generate MEF cultures.  
435 Cultures were grown in 10% FBS (Gibco, Waltham, MA, USA), 1% L-Glutamine (Gibco, Waltham, MA,  
436 USA), 1% penicillin-streptomycin (10,000 U/mL, Gibco, Waltham, MA, USA) in DMEM (Wisent, St. Bruno,  
437 QC, CA). Media was changed every 3-4 days or as required. MEFs were grown for several passages and frozen  
438 at passage 2 (P2), P3, P4 and P6. Western blotting and q-PCR were performed on P4 MEFs, to guarantee that  
439 maternal STI1 was not affecting growth and patterns of protein expression (Beraldo et al., 2013).  $2 \times 10^6$   
440 cells/mL were frozen in 10% DMSO, 20% FBS in DMEM for 24 hours at -80°C, then transferred to liquid  
441 nitrogen for long-term storage. Before their use for experiments, MEFs were thawed and plated in T25 flasks in  
442 media with 20% FBS, allowed to reach 70-80% confluency, then split to smaller plates in normal medium, as  
443 required.

### 444 **Generation of SN56- STI1 KO cells using CRISPR/Cas9**

445 The guide RNAs for the mouse *Stip1* gene (STI1 Top 1: 5' CACCGGTAGTCTCCTTTCTTGGCGT 3'  
446 and STI1 Bottom 1 5' AAACACGCCAAGAAAGGAGACTACC 3') were designed using Optimized CRISPR  
447 Design (<http://crispr.mit.edu/>). They were phosphorylated, annealed and cloned at BbsI enzyme restriction site  
448 into the px330 modified vector (Addgene, Watertown, MA, USA) (Eto et al., 2016), according to instructions  
449 from Addgene. The construct was sequenced and used to transfect SN56 cells with Lipofectamine 2000  
450 (Invitrogen, Carlsbad, CA, USA). Clones were then isolated by serial dilution. Isolated clones were grown  
451 separately. Immunoblot analysis was used to determine clones showing complete STI1 KO. Although several  
452 clones were obtained with decreased levels of STI1, only one clone showed complete elimination of STI1

453 protein expression and this clone was expanded and used to further investigate Hsp90 client proteins and co-  
454 chaperones.

### 455 **Quantitative RT-PCR**

456 RNA was isolated using the Aurum Total RNA Fatty and Fibrous Tissue Pack (Cat# 732-6870) Bio-Rad  
457 kit according to the manufacturer's instructions. cDNA was synthesized using 2 µg RNA according to protocol  
458 (Applied Biosystems, Foster City, CA, USA). DNA was diluted and qPCR performed using SYBR Green, on a  
459 Bio-Rad CFX96 thermocycler.

460 Cortices from 14-16 months old perfused male mice or lysates collected from MEFs were stored in  
461 TRIzol and then frozen on dry ice before transfer to -80°C. Samples were homogenized in TRIzol and RNA  
462 was isolated using the Aurum Total RNA for fatty and fibrous tissue kit. cDNA was generated as described in  
463 Beraldo et al. (2013). β-actin was used to normalize mRNA levels and negative controls were included (four to  
464 five distinct tissue extracts per genotype on each plate). The following primers were used to assess mRNA  
465 levels. STI1-F: 5'-GCCAAGAAAGGAGACTACCAG-3' and STI1-R: 5'-

466 TCATAGGTTCGTTTGGCTTCC-3' for exons 2 and 3 and STI1-97F: ACCCCAGATGTGCTCAAGAA and

467 STI1-97R: TCTCCTCCAAAGCCAAGTCA for exons 8 and 9. Hsp90α-F: CCACCCTGCTCTGTACTACT;

468 Hsp90α-R: CCAGGGCA TCTGAAGCATTA; Hsp90β-F: CTCGGCTTTCCCGTCAAGAT, Hsp90β-R:

469 GTCCAGGGCATCTGAAGCAT, Hsp70-R: ACCTTGACAGTAATCGGTGC, Hsp70-F:

470 CTCCCGGTGTGGTCTAGAAA, HSF1-F: GATGACACCGAGTTCCAGCA, HSF1-R:

471 CACTCTTCAGGGTGGACACG, CHIP-F: CTTCTACCCTCAATTCCGCCT, CHIP-R:

472 CATTGAGAAGTGGCCTTCCGA, Pin1-177F: AAGCAGACGCTCCATACCTG, Pin1-177R:

473 AGAGTCTGGACACGTGGGTA, Fkbp5-83F: CTGCTGTGGTGGGAAGGACAT, Fkbp5-83R:

474 TCCCAATCGGAATGTCGTGG, Nr3c1-160F: TGTGAGTTCTCCTCCGTCCA, Nr3c1-160R:

475 GTAATTGTGCTGTCCTTCCACTG, Mapt-200F: AACCAGTATGGCTGACCCTC,

476 Mapt-200R: TCACGTCTTCAGCAGTTGGA, Grk2-119F: CTGCCAGAGCCCAGCATC,

477 Grk2-119R: AGGCAGAAGTCCCGGAAAAG, Actin-F: TGGAATCCTGTGGCATCCATGA, Actin-

478 R: AATGCCTGGGTACATGGTGGTA.

## 479 **Immunofluorescence**

480 Immunofluorescent labelling of fixed cell cultures was conducted as previously described (Beraldo et  
481 al., 2013). For MEFs, P4 cells were used. Cells were split from T25 flasks at a density of  $6 \times 10^4$  cells to 24-  
482 well dishes with poly-lysine coated coverslips. Once MEFs reached 80% confluence (~2-4 days), media was  
483 removed, coverslips were washed three times with PBS and then fixed for 20 minutes with 4% cold  
484 paraformaldehyde (PFA). After three PBS 0.5% Triton X-100 washes, cells were blocked in 0.5% Triton X-100  
485 and 5% bovine serum albumin (BSA) in PBS for one hour at room temperature (RT) before overnight  
486 incubation with primary antibodies in 0.1% Triton X-100 and 0.1% BSA in PBS at 4°C. Cells were incubated  
487 with STI1 antibody (1:200 in-house antibody generated by Bethyl Laboratories Montgomery, USA using  
488 recombinant STI1), anti-Hsp70 (1:100, Catalog# Ab2787, Mouse mAb, Abcam, Cambridge, UK), anti-Hsp90  
489 (1:50, Catalog# 4877, Rabbit mAb, Cell Signalling, Danvers, MA, USA). Alexa Fluor-conjugated secondary  
490 antibodies (Molecular probes) were used at 1:800 in 0.5% bovine serum albumin and 0.1% Triton X-100 in  
491 PBS. Cells were counterstained with DAPI, mounted onto slides using Immu-Mount (Thermo Scientific,  
492 Waltham, MA, USA) and imaged using Leica TCS SP8 (Leica Microsystems Inc., Ontario, Canada) confocal  
493 system (63X objective, N.A. of 1.4 and 40X objective, N.A. of 1.3). Two-three coverslips per embryo were  
494 imaged and 8 random fields of view were captured for each coverslip by a researcher blind to genotypes.

## 495 **RNA-seq analysis**

496 For RNA sequencing, 5 WT and 5 homozygous  $\Delta$ TPR1 samples were used. Briefly, tissue was  
497 homogenized in TRIzol before phase separation with chloroform. After cold centrifugation, top aqueous layer  
498 containing RNA was isolated. RNA was precipitated with 100% ethanol and pellet was collected after  
499 centrifugation. RNA pellet was washed with 85% ethanol before drying and resuspending in DEPC treated  
500 water. RNA quality was determined with RNA 2100 Bioanalyzer (Agilent, Santa Clara, CA USA), and samples  
501 with RIN values ranged between 8.2 and 8.7 were used. Sequencing-compatible poly(A)-terminated single-end  
502 libraries were generated using an RNA Library prep kit (SENSE Total RNA-Seq Library Prep Kit, 009;  
503 Lexogen, Vienna, Austria) following manufacturer's instructions. Libraries were barcoded and sequenced on a  
504 NextSeq Series Sequencing System (HUJI Center for Genomic Technologies) using Illumina flow cell

(Illumina 500 NextSeq High Output v2 Kit, FC-404-2005; Illumina, San Diego, CA, USA). The sequencing data were uploaded to the usegalaxy.org (Afgan et al., 2016) web platform for further analysis. All reads were aligned to the mouse reference genome (GRCm38/mm10) with an average 93.7% mapping (TopHat2) (Kim et al., 2013). Gene expression counts were generated using HTseq-count (Anders, Pyl, & Huber, 2015) (GRCm38/mm10) and expression analysis was performed using the Bioconductor DESeq2 (Love, Huber, & Anders, 2014) software via R platform (Team, 2017). Libraries from all samples were overall similar in depth.

### **Cell death and viability assay**

Cell death was assessed by the Live/Dead Viability/Cytotoxicity Kit assay for mammalian cells (Cat# L3224, Thermo Fisher Scientific – Invitrogen, Waltham, CA, USA) as previously described (Beraldo et al., 2016; Beraldo et al., 2013; Soares et al., 2013). Briefly, SN56 cells and P4 MEFs were incubated with the calcein-AM/ethidium homodimer mix according to the manufacturer's instructions in the original medium for 45 min and then washed 3 times with Krebs-Ringer HEPES (KRH) buffer. Images were collected using the LSM 510 META ConfoCor2 equipped with a 10x/0.3 objective. 488 nm laser was used to detect for calcein (live cells) or ethidium homodimer (dead cells). Cell death levels were quantified as the percentage of dead cells relative to the total number of cells. The numbers of live and dead cells were quantified, with 4-5 embryos per genotype and each embryo in duplicate or triplicate. Eight randomized fields of view within the well were analysed.

Viability of SN56-STI1 KO cells was also assessed using CellTiter-Glo® Luminescent Cell Viability Assay (Catalog # G7570, Promega, Madison, WI, USA) which quantifies levels of ATP, which is an indirect measure of number of cells. Experiments were conducted following manufacturer's instructions. Briefly, cells were plated in 96-well plates, serum starved then treated to lyse cells and release ATP. A recombinant luciferase is added to the cells then relative luminescence is collected using a plate reader. For the Thapsigargin (Catalog# 586005, Millipore, Burlington, MA, USA) treatment to induce ER stress, cells were treated at a concentration of 10  $\mu$ M for 24 h.

### **BrdU proliferation assay**

530 BrdU proliferation assay was performed as described previously (Beraldo et al., 2013). P4 MEFs were  
531 serum starved for 24 h before 30  $\mu$ M BrdU (dissolved in sterile water) was added to serum-free culture media  
532 for 1.5 h. Media was removed and cells were fixed with cold 4% PFA for 20 minutes. Cells were washed with  
533 PBS three times then treated with 2 M HCl for 30 minutes. Acid was quickly removed and 9.1 M Sodium  
534 Borate was added to cells for 12 minutes. Cells were then washed with PBS three times, blocked for 1 h in PBS  
535 + 0.3% Triton X-100 and 5% normal goat serum, and then incubated overnight at 4°C with anti-BrdU biotin  
536 conjugate (1:100, Catalog# MAB3262B, Millipore, Burlington, MA, USA), followed by incubation with  
537 Streptavidin Alexa Fluor 488 conjugate (1:800, Catalog# S32354, Invitrogen, Waltham, MA, USA). Cells were  
538 washed with PBS then treated for 20 minutes with Hoechst. The BrdU positive nuclei were quantified and  
539 compared to total nuclei, with 4-5 embryos per genotype. Experiments were replicated three times.  
540 Experimenter was blind during image capture.

#### 541 **Expression of STI1 recombinant domains in bacteria**

542 Expression of recombinant STI1 and analysis of STI1 antibody interaction with STI1 domains was  
543 performed as previously described (Maciejewski et al., 2016).

#### 544 **Western Blotting**

545 Mice were decapitated and brains were rapidly excised. Cortex and hippocampus were dissected on ice  
546 and flash frozen on dry ice before transferred to -80°C. Protein extraction and Western blot were carried out as  
547 previously described (Beraldo et al., 2013; Guzman et al., 2011). Briefly, protein was extracted from whole cell  
548 lysates or brain tissues using ice cold RIPA lysis buffer with protease and phosphatase inhibitors. Samples were  
549 sonicated using sonic dismembrator 3 x 7 s, rocked for 20 minutes then centrifuged for 20 minutes at 10,000 g  
550 at 4°C. Supernatant was collected and used for quantifying protein concentration using the Bio-Rad DC Protein  
551 assay. 5-30  $\mu$ g of protein was loaded on Bolt 4-12% Bis-Tris gradient gels. The primary antibodies used in  
552 immunoblotting were: anti-STI1 (1:5000, in-house antibody generated by Bethyl Laboratories Montgomery,  
553 USA) (Beraldo et al., 2013), anti-Hsp90 (1:1000, Catalog# 4877, Cell Signalling, Danvers, MA, USA), anti-  
554 Hsp70 (1:1000, Catalog# ab2787, Abcam, Cambridge, UK), anti-Hsp40 (1:1000, Catalog# 4868, Cell  
555 Signalling, Danvers, MA, USA) anti-CHIP (1:1000, Catalog# 2080, Cell Signalling, Danvers, MA, USA), anti-

556 Glucocorticoid Receptor (1:1000, Catalog# 3660, Cell Signalling, Danvers, MA, USA), anti-HSF1 (1:1000,  
557 Catalog# 4356, Cell Signalling, Danvers, MA, USA), anti-Hsp90 $\beta$  (1:1000, Catalog# 5087, Cell Signalling,  
558 Danvers, MA, USA), anti-GRK2 (1:1000, Catalog# 3982, Cell Signalling, Danvers, MA, USA) anti-FKBP51  
559 (1:1000, ab2901, Abcam, Cambridge, UK), anti-CypA (1:2000, Catalog# ab126738, Abcam, Cambridge, UK),  
560 anti-tau H150 (1:200, Catalog# sc-5587, Santa Cruz, DALLA, TX, USA), anti-Pin1 (1:250, Catalog# sc-15340,  
561 Santa Cruz, DALLA, TX, USA), anti-Ahsa1 (1:1000, Catalog# 12841, Cell Signalling, Danvers, MA, USA), anti-  
562 Cdc37 (1:1000, Catalog# 4793, Cell Signalling, Danvers, MA, USA), anti-p23 (1:1000, Catalog#: NB300-576,  
563 Novus Biologicals; Biotechnie, Littleton, CO, USA). Protein expression was quantified using the Alpha  
564 Innotech software for the FluoroChemQ chemiluminescent exposure system (Alpha Innotech; GE Healthcare,  
565 London, ON, Canada) or ImageLab for ChemiDoc system (BioRad, Hercules, CA, USA). Expression data was  
566 relative to  $\beta$ -actin (1:25000, Catalog # A3854, Sigma, St. Louis, MO, USA) and normalized to WT controls. At  
567 least 2 independent blots were produced with no less than four animals analyzed for each protein (generally  
568 n=4-9).

### 569 **Silver Staining**

570 Silver staining was performed as described previously (Kolisnyk et al., 2016). Briefly, after trans-cardial  
571 perfusion, mouse brains were fixed in 4% PFA for 48 h before long-term storage in PBS + 0.02% sodium azide.  
572 Brains were cut using Leica VT1000S Vibratome, at 30  $\mu$ m thickness and sections were stored free floating in  
573 PBS + 0.02% sodium azide. Using 6-well plates and net-wells, free-floating sections were stained with the  
574 NeuroSilver<sup>TM</sup> staining kit II (Catalog#: PK301, FD NeuroTechnologies, Inc., Baltimore, MD, USA) following  
575 manufacturer's instructions. This kit labels degenerating neuronal bodies, processes and terminals. Images were  
576 taken using Zeiss Axioskop Optical Microscope at 20X magnification, with two images being taken along the  
577 dentate gyrus, from the apex to the hilus/opening of the blades, three images of the CA3, respective to CA3  
578 subfields (CA3a, CA3b, CA3c), and one image from the CA1 region. At least 4 sections from 4  
579 animals/genotype were stained and sections selected were at least 120  $\mu$ m apart. Using ImageJ (Fiji) Software  
580 (NIH, Bethesda, MD, USA), images were converted to 8 bits and thresholded to make the silver particles black

581 and background white (Circularity of 0-0.65). Particles were numbered and averaged for each animal. The same  
582 parameters were used for each section, animal and both genotypes.

### 583 **NeuN Staining and Hippocampal Neuron Density**

584 NeuN staining was performed as described previously (Kolisnyk et al., 2016). Briefly, 30  $\mu$ m thick  
585 sections were mounted onto charged microscope slides, boiled in 10 mM sodium citrate for 20 minutes and then  
586 cooled for 40 minutes to room temperature for antigen retrieval. Sections were then washed three times in  
587 water, then immersed in 3% hydrogen peroxide for 10 minutes, followed by two washes in 0.025% Triton-X  
588 PBS. Tissue was blocked in 10% normal goat serum and 1% BSA in PBS for 2 h, at RT. Sections were  
589 incubated with anti-NeuN (1:15000, Catalog# ab104224, Mouse mAb, Abcam, Cambridge, UK) overnight at  
590 4°C, washed twice with 0.025% Triton-X in PBS, then incubated for 1 h in biotinylated goat anti-mouse  
591 secondary antibody (1:200, Catalog# BA9200, Vector Laboratories, Burlingame, CA, USA). Following washes,  
592 sections were incubated for 30 minutes in Vectastain Elite ABC Kit (Catalog# PK-6100, Vector Laboratories,  
593 Burlingame, CA, USA) following manufacturer's instructions. Next, sections were treated with DAB  
594 Peroxidase Substrate Kit (Catalog# SK-4100, Vector Laboratories, Burlingame, CA, USA) following  
595 manufacturer's instructions. Sections were washed, then dehydrated and cleared using a series of ethanol and  
596 xylene washes. Staining was performed in 3-5 months old and 14-16 months old mice. Four sections at least 60  
597  $\mu$ m apart were selected from each animal to allow for unbiased selection within similar coordinates for each  
598 animal, starting around Lateral 2.356 mm (sagittal sections). Images were taken using Zeiss Axioskop Optical  
599 Microscope at 20X magnification. For each section, one image of each subfield of the CA3 region of the  
600 hippocampus was taken (CA3a, CA3b, CA3c) and one along the CA1. The number of NeuN cells in each  
601 subfield of the CA3 was counted, in each section and averaged per animal. The number of NeuN positive cells  
602 was then averaged across four to five animals, per genotype. By adding the number of cells across each CA3  
603 subfield, the average sum of neurons in the CA3 was also quantified. The experimenter was blind to genotypes  
604 during imaging and quantification.

### 605 **Metabolic Cages**



606 Analysis of mouse activity, food and water intake, oxygen consumption, carbon dioxide production and  
607 sleep cycles was analyzed using The Comprehensive Lab Animal Monitoring System as previously described  
608 (Guzman et al., 2013; Janickova et al., 2017; Roy et al., 2013).

### 609 **Morris Water Maze (MWM)**

610 The spatial version of the MWM was performed as described elsewhere (Beraldo et al., 2015; Kolisnyk  
611 et al., 2016; Kolisnyk et al., 2013). Nine-ten animals/genotype were used in MWM based on previous estimates  
612 using this protocol (Beraldo et al., 2015; Kolisnyk et al., 2016; Kolisnyk et al., 2013) and mice were tested at 9  
613 months of age. Animals were allowed to acclimatize to the room for 30 minutes before the start of the  
614 experiment. Experiments were performed in a 22-24°C room. Mice were placed in a 1.5 m diameter pool (water  
615 temperature was 26°C) with a transparent plastic platform 1 cm below water surface. Two large lamps next to  
616 the pool were lit all throughout the experiment and spatial cues were present on the walls. Mice were  
617 counterbalanced and trained over four days to find a platform in one quadrant of the water maze. Animals had  
618 four training sessions per day lasting 90 s each (with a 15 min inter-trial interval). If a mouse failed to reach the  
619 platform it was positioned on it for 10 seconds before being removed from the pool. In analysis, a 60 s latency  
620 to reach platform value was input for animals that exceeded 60 s before reaching the platform and ending the  
621 trial. On the fifth day, mice were placed in the pool once (without the platform) for 60 s. Time spent in target  
622 quadrant was compared to other quadrants. Activity and behaviour were recorded with ANY-Maze Software.  
623 The researcher was not blind to genotypes during experiments, and animals were randomly allocated as for the  
624 order they did the task. Target quadrant and analysis was blind.

### 625 **Analysis of Hsp90 and co-chaperone variants in human datasets**

626 We evaluated the frequency of loss-of-function variants (protein truncating variants, PTVs) in multiple  
627 large datasets aggregating human genetic information. Specifically, we sought PTVs in the following genes:  
628 STI1, HSP90AA1, HSP90AB1, PTGES3, AHSA1, FKBP5, PIN1, STUB1, CDC37, PPIA, PPP5C, and SGTA.  
629 To assess the frequency of PTVs in these genes in a large and ethnically diverse cohort of relatively healthy  
630 individuals, and to extract the probability of loss-of-function (pLI) score for each gene, we used the Exome  
631 Aggregation Consortium (ExAC, n=60,706) and the Genome Aggregation Database (gnomAD, n=138,632),

632 (Consortium, 2013; Lek et al., 2016). We also assessed the frequency of PTVs, missense variants, insertions,  
633 deletions, and/or duplications in these genes of interest in a cohort of clinically-ascertained individuals. To this  
634 end, we used the GWAS Catalog, ClinVar, and DatabasE of genomC variation and Phenotype in Humans  
635 using Ensembl Resources (DECIPHER) (Firth et al., 2009; Landrum et al., 2016; MacArthur et al., 2017; Mick  
636 et al., 2011; Miller et al., 2010; Stenson et al., 2017). We did not use the Human Gene Mutation Database  
637 (HGMD) as this resource is no longer open-source, and currently only provides minimal information for  
638 variants identified in patients. We applied the following criteria to ensure that PTVs observed are likely to be  
639 true PTVs: 1) ensuring the PTV is present in the canonical transcript; 2) the PTV occurs prior to the last exon of  
640 the gene; and 3) the site and the surrounding region of the PTV are sufficiently covered, 4) there is adequate  
641 allele balance between the reference allele and the alternate allele for heterozygous PTVs, and 5) the variant  
642 does not display strand bias. For variation reported by ClinVar and DECIPHER, we only included information  
643 on cases with single nucleotide variants (SNVs), small insertions or deletions (indels), or copy number variation  
644 (CNV, gain and loss) of large genomic regions, that were classified as either ‘pathogenic’ or ‘likely pathogenic’  
645 by each database’s respective criteria. Due to the difficulty in sequencing regions of HSPA1A (Hsp70), an  
646 accurate pLI score was not obtained for this gene.

### 647 **Statistical Analyses**

648 Data were compiled and analyzed using GraphPad Prism 6.0 Software and results are represented as  
649 Mean  $\pm$  SEM. Comparison of two groups was analyzed using Student’s t-test (two sided). For groups larger  
650 than two, One or Two-Way ANOVA or Repeated Measures Two-Way ANOVA was used when needed and  
651 Post-hoc tests corrected for multiple comparisons was used when required. Mouse birth frequencies were  
652 analysed by the Chi-Square test.

653

654

655 **This manuscript was previously submitted as a pre-print using BioRxiv.**

656 <https://doi.org/10.1101/258673>

657

658 **Acknowledgements:**

659 We thank Jose Marques-Lopes for help in generating MEFs. MAMP and VFP received support from the  
660 Canadian Institutes of Health Research (MOP 126000, MOP 136930, MOP 89919), National Science and  
661 Engineering Research Council of Canada (402524-2013 RGPIN). MAMP, MLD and FB received support from  
662 the ALS Canada. Initial generation of ST11 mutant mice was supported by PrioNet-Canada and FAPESP  
663 (Brazil) to MAMP, VFP and VRM. MHL received a FAPESP Sabbatical fellowship (2016/00440-9) and a  
664 research grant (2017/20271-0). HS acknowledges support by The Israeli Ministry of Science, Technology and  
665 Space, Grant No. 53140, The Israel I-Core Center of Excellence for Mass Trauma, the Legacy Heritage Science  
666 Initiative (LHSI) of The Israel Science Foundation Grant No. 817/13, and the Edmond and Lily Safra Center for  
667 Brain Sciences (ELSC). REL received support from OGS and the Alzheimer's Society of Canada through the  
668 Alzheimer's Society Research Program. SMKF is supported by the ALS Canada Tim E. Noël Postdoctoral  
669 Fellowship. The funders had no role in study design, data collection and analysis, decision to publish, or  
670 preparation of the manuscript.

671

672 **Author contributions:** Designed experiments, performed experiments and analysed data: REL, AR,  
673 GM, FHB, AM, RG; Performed experiments and analysed data: JF; Analysed data: SMKF, W-YC, DG;  
674 Contributed with reagents and special tools: MHL, VRM, MLD; Designed experiments: HS, VFP, MAMP;  
675 Wrote manuscript: REL, SMKF, VFP, HS, MAMP. All authors edited and approved the final version of the  
676 manuscript.

677 **Competing interests:**

678 The authors declare no conflicts of interest.

679

680

681

682

683

684

## References

685

Adamowicz, D. H., Roy, S., Salmon, D. P., Galasko, D. R., Hansen, L. A., Masliah, E., & Gage, F. H. (2017). Hippocampal alpha-Synuclein in Dementia with Lewy Bodies Contributes to Memory Impairment and Is Consistent with Spread of Pathology. *J Neurosci*, *37*(7), 1675-1684. doi:10.1523/JNEUROSCI.3047-16.2016

686

687

688

Afgan, E., Baker, D., van den Beek, M., Blankenberg, D., Bouvier, D., Cech, M., . . . Goecks, J. (2016). The Galaxy platform for accessible, reproducible and collaborative biomedical analyses: 2016 update. *Nucleic Acids Res*, *44*(W1), W3-W10. doi:10.1093/nar/gkw343

691

692

Anders, S., Pyl, P. T., & Huber, W. (2015). HTSeq--a Python framework to work with high-throughput sequencing data. *Bioinformatics*, *31*(2), 166-169. doi:10.1093/bioinformatics/btu638

693

694

695

Barent, R. L., Nair, S. C., Carr, D. C., Ruan, Y., Rimerman, R. A., Fulton, J., . . . Smith, D. F. (1998). Analysis of FKBP51/FKBP52 chimeras and mutants for Hsp90 binding and association with progesterone receptor complexes. *Mol Endocrinol*, *12*(3), 342-354. doi:10.1210/mend.12.3.0075

696

697

Beers, M., & Kempfues, K. (2006). Depletion of the co-chaperone CDC-37 reveals two modes of PAR-6 cortical association in *C. elegans* embryos. *Development*, *133*(19), 3745-3754. doi:10.1242/dev.02544

698

699

700

Beraldo, F. H., Ostapchenko, V. G., Caetano, F. A., Guimaraes, A. L., Ferretti, G. D., Daude, N., . . . Prado, M. A. (2016). Regulation of Amyloid beta Oligomer Binding to Neurons and Neurotoxicity by the Prion Protein-mGluR5 Complex. *J Biol Chem*, *291*(42), 21945-21955. doi:10.1074/jbc.M116.738286

701

702

703

Beraldo, F. H., Soares, I. N., Goncalves, D. F., Fan, J., Thomas, A. A., Santos, T. G., . . . Prado, M. A. (2013). Stress-inducible phosphoprotein 1 has unique cochaperone activity during development and regulates cellular response to ischemia via the prion protein. *FASEB J*, *27*(9), 3594-3607. doi:10.1096/fj.13-232280

704

705

706

Beraldo, F. H., Thomas, A., Kolisnyk, B., Hirata, P. H., De Jaeger, X., Martyn, A. C., . . . Prado, M. A. (2015). Hyperactivity and attention deficits in mice with decreased levels of stress-inducible phosphoprotein 1 (STIP1). *Dis Model Mech*, *8*(11), 1457-1466. doi:10.1242/dmm.022525

707

708

709

Beyer, M. K., Bronnick, K. S., Hwang, K. S., Bergsland, N., Tysnes, O. B., Larsen, J. P., . . . Apostolova, L. G. (2013). Verbal memory is associated with structural hippocampal changes in newly diagnosed Parkinson's disease. *J Neurol Neurosurg Psychiatry*, *84*(1), 23-28. doi:10.1136/jnnp-2012-303054

710

711

712

Brehme, M., Voisine, C., Rolland, T., Wachi, S., Soper, J. H., Zhu, Y., . . . Morimoto, R. I. (2014). A chaperome subnetwork safeguards proteostasis in aging and neurodegenerative disease. *Cell Rep*, *9*(3), 1135-1150. doi:10.1016/j.celrep.2014.09.042

713

714

Chang, H. C., Nathan, D. F., & Lindquist, S. (1997). In vivo analysis of the Hsp90 cochaperone Sti1 (p60). *Mol Cell Biol*, *17*(1), 318-325.

715

716

717

Chen, L., Ding, Y., Cagniard, B., Van Laar, A. D., Mortimer, A., Chi, W., . . . Zhuang, X. (2008). Unregulated cytosolic dopamine causes neurodegeneration associated with oxidative stress in mice. *J Neurosci*, *28*(2), 425-433. doi:10.1523/JNEUROSCI.3602-07.2008

718

719

720

Connam, J. N., Assimon, V. A., Reed, R. A., Tse, E., Southworth, D. R., Zuiderweg, E. R., . . . Sun, D. (2014). The molecular chaperone Hsp70 activates protein phosphatase 5 (PP5) by binding the tetratricopeptide repeat (TPR) domain. *J Biol Chem*, *289*(5), 2908-2917. doi:10.1074/jbc.M113.519421

721

722

Consortium, G. T. (2013). The Genotype-Tissue Expression (GTEx) project. *Nat Genet*, *45*(6), 580-585. doi:10.1038/ng.2653

723

724

Cyr, D. M., Lu, X., & Douglas, M. G. (1992). Regulation of Hsp70 function by a eukaryotic DnaJ homolog. *J Biol Chem*, *267*(29), 20927-20931.

725

726

727

Dai, Q., Zhang, C., Wu, Y., McDonough, H., Whaley, R. A., Godfrey, V., . . . Patterson, C. (2003). CHIP activates HSF1 and confers protection against apoptosis and cellular stress. *Embo j*, *22*(20), 5446-5458. doi:10.1093/emboj/cdg529

728

729

Dickey, C. A., Kamal, A., Lundgren, K., Klosak, N., Bailey, R. M., Dunmore, J., . . . Petrucelli, L. (2007). The high-affinity HSP90-CHIP complex recognizes and selectively degrades phosphorylated tau client proteins. *J Clin Invest*, *117*(3), 648-658. doi:10.1172/JCI29715

730

731

732

Ebong, I. O., Beilsten-Edmands, V., Patel, N. A., Morgner, N., & Robinson, C. V. (2016). The interchange of immunophilins leads to parallel pathways and different intermediates in the assembly of Hsp90 glucocorticoid receptor complexes. *Cell Discov*, *2*, 16002. doi:10.1038/celldisc.2016.2

- 733 Ebrahimi-Fakhari, D., Saidi, L. J., & Wahlster, L. (2013). Molecular chaperones and protein folding as therapeutic targets  
734 in Parkinson's disease and other synucleinopathies. *Acta Neuropathol Commun*, *1*, 79. doi:10.1186/2051-5960-1-  
735 79
- 736 Etoc, F., Metzger, J., Ruzo, A., Kirst, C., Yoney, A., Ozair, M. Z., . . . Siggia, E. D. (2016). A Balance between Secreted  
737 Inhibitors and Edge Sensing Controls Gastruloid Self-Organization. *Dev Cell*, *39*(3), 302-315.  
738 doi:10.1016/j.devcel.2016.09.016
- 739 Farkas, Z., Kalapis, D., Bodi, Z., Szamecz, B., Daraba, A., Almasi, K., . . . Pal, C. (2018). Hsp70-associated chaperones have a  
740 critical role in buffering protein production costs. *Elife*, *7*. doi:10.7554/eLife.29845
- 741 Farovik, A., Dupont, L. M., & Eichenbaum, H. (2010). Distinct roles for dorsal CA3 and CA1 in memory for sequential  
742 nonspatial events. *Learn Mem*, *17*(1), 12-17. doi:10.1101/lm.1616209
- 743 Firth, H. V., Richards, S. M., Bevan, A. P., Clayton, S., Corpas, M., Rajan, D., . . . Carter, N. P. (2009). DECIPHER: Database  
744 of Chromosomal Imbalance and Phenotype in Humans Using Ensembl Resources. *Am J Hum Genet*, *84*(4), 524-  
745 533. doi:10.1016/j.ajhg.2009.03.010
- 746 Floer, M., Bryant, G. O., & Ptashne, M. (2008). HSP90/70 chaperones are required for rapid nucleosome removal upon  
747 induction of the GAL genes of yeast. *Proc Natl Acad Sci U S A*, *105*(8), 2975-2980. doi:10.1073/pnas.0800053105
- 748 Fontaine, S. N., Zheng, D., Sabbagh, J. J., Martin, M. D., Chaput, D., Darling, A., . . . Dickey, C. A. (2016). DnaJ/Hsc70  
749 chaperone complexes control the extracellular release of neurodegenerative-associated proteins. *Embo j*,  
750 *35*(14), 1537-1549. doi:10.15252/embj.201593489
- 751 Frydman, J., Nimmegern, E., Ohtsuka, K., & Hartl, F. U. (1994). Folding of nascent polypeptide chains in a high molecular  
752 mass assembly with molecular chaperones. *Nature*, *370*(6485), 111-117. doi:10.1038/370111a0
- 753 Fuhrmann-Stroissnigg, H., Ling, Y. Y., Zhao, J., McGowan, S. J., Zhu, Y., Brooks, R. W., . . . Robbins, P. D. (2017).  
754 Identification of HSP90 inhibitors as a novel class of senolytics. *Nat Commun*, *8*(1), 422. doi:10.1038/s41467-017-  
755 00314-z
- 756 Gaiser, A. M., Brandt, F., & Richter, K. (2009a). The non-canonical Hop protein from *Caenorhabditis elegans* exerts  
757 essential functions and forms binary complexes with either Hsc70 or Hsp90. *J Mol Biol*, *391*(3), 621-634.  
758 doi:10.1016/j.jmb.2009.06.051
- 759 Gaiser, A. M., Brandt, F., & Richter, K. (2009b). The Non-canonical Hop Protein from *Caenorhabditis elegans* Exerts  
760 Essential Functions and Forms Binary Complexes with Either Hsc70 or Hsp90. *J.Mol.Biol.*
- 761 Gangaraju, V. K., Yin, H., Weiner, M. M., Wang, J., Huang, X. A., & Lin, H. (2011). *Drosophila* Piwi functions in Hsp90-  
762 mediated suppression of phenotypic variation. *Nat.Genet.*, *43*(2), 153-158.
- 763 Gemmell, E., Bosomworth, H., Allan, L., Hall, R., Khundakar, A., Oakley, A. E., . . . Kalaria, R. N. (2012). Hippocampal  
764 neuronal atrophy and cognitive function in delayed poststroke and aging-related dementias. *Stroke*, *43*(3), 808-  
765 814. doi:10.1161/STROKEAHA.111.636498
- 766 Gilbert, P. E., & Brushfield, A. M. (2009). The role of the CA3 hippocampal subregion in spatial memory: a process  
767 oriented behavioral assessment. *Prog Neuropsychopharmacol Biol Psychiatry*, *33*(5), 774-781.  
768 doi:10.1016/j.pnpbp.2009.03.037
- 769 Grad, I., Cederroth, C. R., Walicki, J., Grey, C., Barluenga, S., Winssinger, N., . . . Picard, D. (2010). The molecular  
770 chaperone Hsp90alpha is required for meiotic progression of spermatocytes beyond pachytene in the mouse.  
771 *PLoS One*, *5*(12), e15770.
- 772 Grad, I., McKee, T. A., Ludwig, S. M., Hoyle, G. W., Ruiz, P., Wurst, W., . . . Picard, D. (2006). The Hsp90 cochaperone p23  
773 is essential for perinatal survival. *Mol.Cell Biol.*, *26*(23), 8976-8983.
- 774 Guzman, M. S., De Jaeger, X., Drangova, M., Prado, M. A., Gros, R., & Prado, V. F. (2013). Mice with selective elimination  
775 of striatal acetylcholine release are lean, show altered energy homeostasis and changed sleep/wake cycle. *J*  
776 *Neurochem*, *124*(5), 658-669. doi:10.1111/jnc.12128
- 777 Guzman, M. S., De Jaeger, X., Raulic, S., Souza, I. A., Li, A. X., Schmid, S., . . . Prado, M. A. (2011). Elimination of the  
778 vesicular acetylcholine transporter in the striatum reveals regulation of behaviour by cholinergic-glutamatergic  
779 co-transmission. *PLoS Biol*, *9*(11), e1001194. doi:10.1371/journal.pbio.1001194
- 780 Harst, A., Lin, H., & Obermann, W. M. (2005). Aha1 competes with Hop, p50 and p23 for binding to the molecular  
781 chaperone Hsp90 and contributes to kinase and hormone receptor activation. *Biochem J*, *387*(Pt 3), 789-796.  
782 doi:10.1042/BJ20041283
- 783 Hildenbrand, Z. L., Molugu, S. K., Herrera, N., Ramirez, C., Xiao, C., & Bernal, R. A. (2011). Hsp90 can accommodate the  
784 simultaneous binding of the FKBP52 and HOP proteins. *Oncotarget*, *2*(1-2), 43-58. doi:10.18632/oncotarget.225

- 785 Hoseini, H., Pandey, S., Jores, T., Schmitt, A., Franz-Wachtel, M., Macek, B., . . . Rapaport, D. (2016). The cytosolic  
786 cochaperone Sti1 is relevant for mitochondrial biogenesis and morphology. *FEBS J*, *283*(18), 3338-3352.  
787 doi:10.1111/febs.13813
- 788 Janickova, H., Rosborough, K., Al-Onaizi, M., Kljatic, O., Guzman, M. S., Gros, R., . . . Prado, V. F. (2017). Deletion of the  
789 vesicular acetylcholine transporter from pedunculopontine/laterodorsal tegmental neurons modifies gait. *J*  
790 *Neurochem*, *140*(5), 787-798. doi:10.1111/jnc.13910
- 791 Jinwal, U. K., Koren, J., 3rd, Borysov, S. I., Schmid, A. B., Abisambra, J. F., Blair, L. J., . . . Dickey, C. A. (2010). The Hsp90  
792 cochaperone, FKBP51, increases Tau stability and polymerizes microtubules. *J Neurosci*, *30*(2), 591-599.  
793 doi:10.1523/JNEUROSCI.4815-09.2010
- 794 Johnson, B. D., Schumacher, R. J., Ross, E. D., & Toft, D. O. (1998). Hop modulates Hsp70/Hsp90 interactions in protein  
795 folding. *J Biol Chem*, *273*(6), 3679-3686.
- 796 Kalaitzakis, M. E., Christian, L. M., Moran, L. B., Graeber, M. B., Pearce, R. K., & Gentleman, S. M. (2009). Dementia and  
797 visual hallucinations associated with limbic pathology in Parkinson's disease. *Parkinsonism Relat Disord*, *15*(3),  
798 196-204. doi:10.1016/j.parkreldis.2008.05.007
- 799 Karam, J. A., Parikh, R. Y., Nayak, D., Rosenkranz, D., & Gangaraju, V. K. (2017). Co-chaperone Hsp70/Hsp90-organizing  
800 protein (Hop) is required for transposon silencing and Piwi-interacting RNA (piRNA) biogenesis. *J Biol Chem*,  
801 *292*(15), 6039-6046. doi:10.1074/jbc.C117.777730
- 802 Kim, D., Pertea, G., Trapnell, C., Pimentel, H., Kelley, R., & Salzberg, S. L. (2013). TopHat2: accurate alignment of  
803 transcriptomes in the presence of insertions, deletions and gene fusions. *Genome Biol*, *14*(4), R36.  
804 doi:10.1186/gb-2013-14-4-r36
- 805 Kolisnyk, B., Al-Onaizi, M., Soreq, L., Barbash, S., Bekenstein, U., Haberman, N., . . . Prado, M. A. (2016). Cholinergic  
806 Surveillance over Hippocampal RNA Metabolism and Alzheimer's-Like Pathology. *Cereb Cortex*.  
807 doi:10.1093/cercor/bhw177
- 808 Kolisnyk, B., Guzman, M. S., Raulic, S., Fan, J., Magalhaes, A. C., Feng, G., . . . Prado, M. A. (2013). ChAT-ChR2-EYFP mice  
809 have enhanced motor endurance but show deficits in attention and several additional cognitive domains. *J*  
810 *Neurosci*, *33*(25), 10427-10438. doi:10.1523/JNEUROSCI.0395-13.2013
- 811 Kozak, M. (1986). Point mutations define a sequence flanking the AUG initiator codon that modulates translation by  
812 eukaryotic ribosomes. *Cell*, *44*(2), 283-292.
- 813 Kuhn, H. G., Dickinson-Anson, H., & Gage, F. H. (1996). Neurogenesis in the dentate gyrus of the adult rat: age-related  
814 decrease of neuronal progenitor proliferation. *J Neurosci*, *16*(6), 2027-2033.
- 815 Lackie, R. E., Maciejewski, A., Ostapchenko, V. G., Marques-Lopes, J., Choy, W. Y., Duennwald, M. L., . . . Prado, M. A. M.  
816 (2017). The Hsp70/Hsp90 Chaperone Machinery in Neurodegenerative Diseases. *Front Neurosci*, *11*, 254.  
817 doi:10.3389/fnins.2017.00254
- 818 Landrum, M. J., Lee, J. M., Benson, M., Brown, G., Chao, C., Chitipiralla, S., . . . Maglott, D. R. (2016). ClinVar: public  
819 archive of interpretations of clinically relevant variants. *Nucleic Acids Res*, *44*(D1), D862-868.  
820 doi:10.1093/nar/gkv1222
- 821 Lee, C. T., Graf, C., Mayer, F. J., Richter, S. M., & Mayer, M. P. (2012). Dynamics of the regulation of Hsp90 by the co-  
822 chaperone Sti1. *Embo j*, *31*(6), 1518-1528. doi:10.1038/emboj.2012.37
- 823 Lee, I., Jerman, T. S., & Kesner, R. P. (2005). Disruption of delayed memory for a sequence of spatial locations following  
824 CA1- or CA3-lesions of the dorsal hippocampus. *Neurobiol Learn Mem*, *84*(2), 138-147.  
825 doi:10.1016/j.nlm.2005.06.002
- 826 Lek, M., Karczewski, K. J., Minikel, E. V., Samocha, K. E., Banks, E., Fennell, T., . . . Exome Aggregation, C. (2016). Analysis  
827 of protein-coding genetic variation in 60,706 humans. *Nature*, *536*(7616), 285-291. doi:10.1038/nature19057
- 828 Li, J., Richter, K., & Buchner, J. (2011). Mixed Hsp90-cochaperone complexes are important for the progression of the  
829 reaction cycle. *Nat.Struct.Mol.Biol.*, *18*(1), 61-66.
- 830 Li, J., Soroka, J., & Buchner, J. (2012). The Hsp90 chaperone machinery: Conformational dynamics and regulation by co-  
831 chaperones. *Biochim.Biophys.Acta*, *1823*(3), 624-635.
- 832 Li, J. S., & Chao, Y. S. (2008). Electrolytic lesions of dorsal CA3 impair episodic-like memory in rats. *Neurobiol Learn Mem*,  
833 *89*(2), 192-198. doi:10.1016/j.nlm.2007.06.006
- 834 Linden, R., Martins, V. R., Prado, M. A., Cammarota, M., Izquierdo, I., & Brentani, R. R. (2008). Physiology of the prion  
835 protein. *Physiol Rev*, *88*(2), 673-728. doi:10.1152/physrev.00007.2007

- 836 Lopes, M. H., Hajj, G. N., Muras, A. G., Mancini, G. L., Castro, R. M., Ribeiro, K. C., . . . Martins, V. R. (2005). Interaction of  
837 cellular prion and stress-inducible protein 1 promotes neuritogenesis and neuroprotection by distinct signaling  
838 pathways. *J Neurosci*, *25*(49), 11330-11339. doi:10.1523/JNEUROSCI.2313-05.2005
- 839 Love, M. I., Huber, W., & Anders, S. (2014). Moderated estimation of fold change and dispersion for RNA-seq data with  
840 DESeq2. *Genome Biol*, *15*(12), 550. doi:10.1186/s13059-014-0550-8
- 841 MacArthur, J., Bowler, E., Cerezo, M., Gil, L., Hall, P., Hastings, E., . . . Parkinson, H. (2017). The new NHGRI-EBI Catalog of  
842 published genome-wide association studies (GWAS Catalog). *Nucleic Acids Res*, *45*(D1), D896-D901.  
843 doi:10.1093/nar/gkw1133
- 844 Maciejewski, A., Ostapchenko, V. G., Beraldo, F. H., Prado, V. F., Prado, M. A., & Choy, W. Y. (2016). Domains of STIP1  
845 responsible for regulating PrPC-dependent amyloid-beta oligomer toxicity. *Biochem J*, *473*(14), 2119-2130.  
846 doi:10.1042/BCJ20160087
- 847 MacLean, M., & Picard, D. (2003). Cdc37 goes beyond Hsp90 and kinases. *Cell Stress.Chaperones.*, *8*(2), 114-119.
- 848 Mayer, M. P. (2013). Hsp70 chaperone dynamics and molecular mechanism. *Trends Biochem Sci*, *38*(10), 507-514.  
849 doi:10.1016/j.tibs.2013.08.001
- 850 Mick, E., McGough, J., Loo, S., Doyle, A. E., Wozniak, J., Wilens, T. E., . . . Faraone, S. V. (2011). Genome-wide association  
851 study of the child behavior checklist dysregulation profile. *J Am Acad Child Adolesc Psychiatry*, *50*(8), 807-817  
852 e808. doi:10.1016/j.jaac.2011.05.001
- 853 Migliorini, D., Lazzarini Denchi, E., Danovi, D., Jochemsen, A., Capillo, M., Gobbi, A., . . . Marine, J. C. (2002). Mdm4  
854 (Mdmx) regulates p53-induced growth arrest and neuronal cell death during early embryonic mouse  
855 development. *Mol Cell Biol*, *22*(15), 5527-5538.
- 856 Miller, D. T., Adam, M. P., Aradhya, S., Biesecker, L. G., Brothman, A. R., Carter, N. P., . . . Ledbetter, D. H. (2010).  
857 Consensus statement: chromosomal microarray is a first-tier clinical diagnostic test for individuals with  
858 developmental disabilities or congenital anomalies. *Am J Hum Genet*, *86*(5), 749-764.  
859 doi:10.1016/j.ajhg.2010.04.006
- 860 Morgner, N., Schmidt, C., Beilsten-Edmands, V., Ebong, I. O., Patel, N. A., Clerico, E. M., . . . Robinson, C. V. (2015). Hsp70  
861 forms antiparallel dimers stabilized by post-translational modifications to position clients for transfer to Hsp90.  
862 *Cell Rep*, *11*(5), 759-769. doi:10.1016/j.celrep.2015.03.063
- 863 Nair, S. C., Rimerman, R. A., Toran, E. J., Chen, S., Prapapanich, V., Butts, R. N., & Smith, D. F. (1997). Molecular cloning of  
864 human FKBP51 and comparisons of immunophilin interactions with Hsp90 and progesterone receptor. *Mol Cell  
865 Biol*, *17*(2), 594-603.
- 866 Nicolet, C. M., & Craig, E. A. (1989). Isolation and characterization of STI1, a stress-inducible gene from *Saccharomyces  
867 cerevisiae*. *Mol Cell Biol*, *9*(9), 3638-3646.
- 868 Ostapchenko, V. G., Beraldo, F. H., Mohammad, A. H., Xie, Y. F., Hirata, P. H., Magalhaes, A. C., . . . Prado, M. A. (2013).  
869 The prion protein ligand, stress-inducible phosphoprotein 1, regulates amyloid-beta oligomer toxicity. *J  
870 Neurosci*, *33*(42), 16552-16564. doi:10.1523/JNEUROSCI.3214-13.2013
- 871 Padurariu, M., Ciobica, A., Mavroudis, I., Fotiou, D., & Baloyannis, S. (2012). Hippocampal neuronal loss in the CA1 and  
872 CA3 areas of Alzheimer's disease patients. *Psychiatr Danub*, *24*(2), 152-158.
- 873 Philp, L. K., Day, T. K., Butler, M. S., Laven-Law, G., Jindal, S., Hickey, T. E., . . . Tilley, W. D. (2016). Small Glutamine-Rich  
874 Tetratricopeptide Repeat-Containing Protein Alpha (SGTA) Ablation Limits Offspring Viability and Growth in  
875 Mice. *Sci Rep*, *6*, 28950. doi:10.1038/srep28950
- 876 Picard, D. (2006). Chaperoning steroid hormone action. *Trends Endocrinol.Metab*, *17*(6), 229-235.
- 877 Pratt, W. B., Gestwicki, J. E., Osawa, Y., & Lieberman, A. P. (2015). Targeting Hsp90/Hsp70-based protein quality control  
878 for treatment of adult onset neurodegenerative diseases. *Annu Rev Pharmacol Toxicol*, *55*, 353-371.  
879 doi:10.1146/annurev-pharmtox-010814-124332
- 880 Retzlaff, M., Hagn, F., Mitschke, L., Hessling, M., Gugel, F., Kessler, H., . . . Buchner, J. (2010). Asymmetric activation of  
881 the hsp90 dimer by its cochaperone hsp1. *Mol.Cell*, *37*(3), 344-354.
- 882 Robitsek, J., Ratner, M. H., Stewart, T., Eichenbaum, H., & Farb, D. H. (2015). Combined administration of levetiracetam  
883 and valproic acid attenuates age-related hyperactivity of CA3 place cells, reduces place field area, and increases  
884 spatial information content in aged rat hippocampus. *Hippocampus*, *25*(12), 1541-1555. doi:10.1002/hipo.22474
- 885 Rodina, A., Wang, T., Yan, P., Gomes, E. D., Dunphy, M. P., Pillarsetty, N., . . . Chiosis, G. (2016). The epichaperome is an  
886 integrated chaperome network that facilitates tumour survival. *Nature*, *538*(7625), 397-401.  
887 doi:10.1038/nature19807



- 888 Rohl, A., Toppel, F., Bender, E., Schmid, A. B., Richter, K., Madl, T., & Buchner, J. (2015). Hop/Sti1 phosphorylation inhibits  
889 its co-chaperone function. *EMBO Rep*, *16*(2), 240-249. doi:10.15252/embr.201439198
- 890 Rohl, A., Wengler, D., Madl, T., Lagleder, S., Toppel, F., Herrmann, M., . . . Buchner, J. (2015). Hsp90 regulates the  
891 dynamics of its cochaperone Sti1 and the transfer of Hsp70 between modules. *Nat Commun*, *6*, 6655.  
892 doi:10.1038/ncomms7655
- 893 Roy, A., Fields, W. C., Rocha-Resende, C., Resende, R. R., Guatimosim, S., Prado, V. F., . . . Prado, M. A. (2013).  
894 Cardiomyocyte-secreted acetylcholine is required for maintenance of homeostasis in the heart. *FASEB J*, *27*(12),  
895 5072-5082. doi:10.1096/fj.13-238279
- 896 Sahasrabudhe, P., Rohrberg, J., Biebl, M. M., Rutz, D. A., & Buchner, J. (2017). The Plasticity of the Hsp90 Co-chaperone  
897 System. *Mol Cell*, *67*(6), 947-961 e945. doi:10.1016/j.molcel.2017.08.004
- 898 Santpere, G., Garcia-Esparcia, P., Andres-Benito, P., Lorente-Galdos, B., Navarro, A., & Ferrer, I. (2018). Transcriptional  
899 network analysis in frontal cortex in Lewy body diseases with focus on dementia with Lewy bodies. *Brain Pathol*,  
900 *28*(3), 315-333. doi:10.1111/bpa.12511
- 901 Sawarkar, R., Sievers, C., & Paro, R. (2012). Hsp90 globally targets paused RNA polymerase to regulate gene expression  
902 in response to environmental stimuli. *Cell*, *149*(4), 807-818.
- 903 Schmid, A. B., Lagleder, S., Grawert, M. A., Rohl, A., Hagn, F., Wandinger, S. K., . . . Buchner, J. (2012a). The architecture  
904 of functional modules in the Hsp90 co-chaperone Sti1/Hop. *EMBO J*.
- 905 Schmid, A. B., Lagleder, S., Grawert, M. A., Rohl, A., Hagn, F., Wandinger, S. K., . . . Buchner, J. (2012b). The architecture  
906 of functional modules in the Hsp90 co-chaperone Sti1/Hop. *Embo j*, *31*(6), 1506-1517.  
907 doi:10.1038/emboj.2011.472
- 908 Soares, I. N., Caetano, F. A., Pinder, J., Rodrigues, B. R., Beraldo, F. H., Ostapchenko, V. G., . . . Prado, M. A. (2013).  
909 Regulation of stress-inducible phosphoprotein 1 nuclear retention by protein inhibitor of activated STAT PIAS1.  
910 *Mol Cell Proteomics*, *12*(11), 3253-3270. doi:10.1074/mcp.M113.031005
- 911 Song, H. O., Lee, W., An, K., Lee, H. S., Cho, J. H., Park, Z. Y., & Ahnn, J. (2009). C. elegans STI-1, the homolog of Sti1/Hop,  
912 is involved in aging and stress response. *J Mol Biol*, *390*(4), 604-617. doi:10.1016/j.jmb.2009.05.035
- 913 Song, Y., & Masison, D. C. (2005). Independent regulation of Hsp70 and Hsp90 chaperones by Hsp70/Hsp90-organizing  
914 protein Sti1 (Hop1). *J Biol Chem*, *280*(40), 34178-34185. doi:10.1074/jbc.M505420200
- 915 Steffenach, H. A., Sloviter, R. S., Moser, E. I., & Moser, M. B. (2002). Impaired retention of spatial memory after  
916 transection of longitudinally oriented axons of hippocampal CA3 pyramidal cells. *Proc Natl Acad Sci U S A*, *99*(5),  
917 3194-3198. doi:10.1073/pnas.042700999
- 918 Stenson, P. D., Mort, M., Ball, E. V., Evans, K., Hayden, M., Heywood, S., . . . Cooper, D. N. (2017). The Human Gene  
919 Mutation Database: towards a comprehensive repository of inherited mutation data for medical research,  
920 genetic diagnosis and next-generation sequencing studies. *Hum Genet*, *136*(6), 665-677. doi:10.1007/s00439-  
921 017-1779-6
- 922 Taipale, M., Krykbaeva, I., Koeva, M., Kayatekin, C., Westover, K. D., Karras, G. I., & Lindquist, S. (2012). Quantitative  
923 analysis of HSP90-client interactions reveals principles of substrate recognition. *Cell*, *150*(5), 987-1001.  
924 doi:10.1016/j.cell.2012.06.047
- 925 Team, R. (2017). R: A language and environment for statistical computing. *R Foundation for Statistical computing*.
- 926 Tsai, J., & Douglas, M. G. (1996). A conserved HPD sequence of the J-domain is necessary for YDJ1 stimulation of Hsp70  
927 ATPase activity at a site distinct from substrate binding. *J Biol Chem*, *271*(16), 9347-9354.
- 928 Voss, A. K., Thomas, T., & Gruss, P. (2000). Mice lacking HSP90beta fail to develop a placental labyrinth. *Development*,  
929 *127*(1), 1-11.
- 930 Wandinger, S. K., Suhre, M. H., Wegele, H., & Buchner, J. (2006). The phosphatase Ppt1 is a dedicated regulator of the  
931 molecular chaperone Hsp90. *Embo j*, *25*(2), 367-376. doi:10.1038/sj.emboj.7600930
- 932 Wolfe, K. J., Ren, H. Y., Trepte, P., & Cyr, D. M. (2013). The Hsp70/90 cochaperone, Sti1, suppresses proteotoxicity by  
933 regulating spatial quality control of amyloid-like proteins. *Mol Biol Cell*, *24*(23), 3588-3602.  
934 doi:10.1091/mbc.E13-06-0315
- 935 Yong, W., Bao, S., Chen, H., Li, D., Sanchez, E. R., & Shou, W. (2007). Mice lacking protein phosphatase 5 are defective in  
936 ataxia telangiectasia mutated (ATM)-mediated cell cycle arrest. *J Biol Chem*, *282*(20), 14690-14694.  
937 doi:10.1074/jbc.C700019200

- 938 Yong, W., Yang, Z., Periyasamy, S., Chen, H., Yucel, S., Li, W., . . . Shou, W. (2007). Essential role for Co-chaperone Fkbp52  
939 but not Fkbp51 in androgen receptor-mediated signaling and physiology. *J Biol Chem*, *282*(7), 5026-5036.  
940 doi:10.1074/jbc.M609360200
- 941 Zanata, S. M., Lopes, M. H., Mercadante, A. F., Hajj, G. N., Chiarini, L. B., Nomizo, R., . . . Martins, V. R. (2002). Stress-  
942 inducible protein 1 is a cell surface ligand for cellular prion that triggers neuroprotection. *Embo j*, *21*(13), 3307-  
943 3316. doi:10.1093/emboj/cdf325
- 944 Zhang, M., Boter, M., Li, K., Kadota, Y., Panaretou, B., Prodromou, C., . . . Pearl, L. H. (2008). Structural and functional  
945 coupling of Hsp90- and Sgt1-centred multi-protein complexes. *Embo j*, *27*(20), 2789-2798.  
946 doi:10.1038/emboj.2008.190
- 947 Zhao, R., Davey, M., Hsu, Y. C., Kaplanek, P., Tong, A., Parsons, A. B., . . . Houry, W. A. (2005). Navigating the chaperone  
948 network: an integrative map of physical and genetic interactions mediated by the hsp90 chaperone. *Cell*, *120*(5),  
949 715-727. doi:10.1016/j.cell.2004.12.024
- 950 Zhou, H., Huang, C., Chen, H., Wang, D., Landel, C. P., Xia, P. Y., . . . Xia, X. G. (2010). Transgenic rat model of  
951 neurodegeneration caused by mutation in the TDP gene. *PLoS Genet*, *6*(3), e1000887.  
952 doi:10.1371/journal.pgen.1000887

953

954

955

956

957

### Figure Legends:

958

959

960

961

962

963

964

965

966

967

968

969

970

971

972

973

974

975

976

977

978

979

**Figure 1: Hsp70/Hsp90 chaperone machinery can support protein maturation or degradation with the help of a number of co-chaperones.** This simplified cartoon demonstrates how co-chaperones of Hsp70 and Hsp90 help coordinate the transfer of client proteins to become mature, functional proteins. CHIP and STI1 compete for Hsp70 binding and STI1 helps to mature clients by physically linking Hsp70 and Hsp90, allowing client transfer from Hsp70 to Hsp90. Depending on client, or if the client is being marked for degradation, a variety of other co-chaperones other than STI1 can be employed by this machinery.

**Figure 2: Generation and characterization of  $\Delta$ TPR1 mice.** **A.** Simplified cartoon of the *Stip1* gene locus with or without recombination to remove exons 2 and 3 and the major domains of the STI1 protein with or without the TPR1 domain (143 amino acid deletion). **B.** Percent survival of male WT,  $\Delta$ TPR1 heterozygous and  $\Delta$ TPR1 homozygous mice from birth to final age of collection, 18 months old. (Solid black line, WT; HET smaller black dash with dots;  $\Delta$ TPR1 small black dots). **C.** Analysis of adult (15-18 months old) cortical brain tissue STI1 transcripts using primers for exons 2 and 3 (see primer location on A), which amplify full length STI1 mRNA but not  $\Delta$ TPR1 mRNA. **D.** qPCR analysis for STI1 transcripts using primers for exons 8 and 9 (see primer location on A, N=8) which amplify both full length and  $\Delta$ TPR1 mRNA. **E.** Representative Western blots of STI1 expression in adult cortical brain extracts. Arrow full-length STI1, arrowhead  $\Delta$ TPR1 protein. **F.** Quantitative analysis of STI1 levels in WT (white bar),  $\Delta$ TPR1 heterozygous (WT/ $\Delta$ TPR1:HET) for full length STI1 (66 kDa, light grey bar) and truncated protein (53 kDa, dark grey bar with stripes) and homozygous  $\Delta$ TPR1 mice (black bar). Data are mean  $\pm$ SEM (N=8). One-way ANOVA with corrections for multiple comparisons with Dunnett's test. **G.** Surface plasmon resonance analysis of affinity of STI1 antibody for each domain of STI1. **H.** Comparison of body weights of mice from 1-70 weeks of age (closed circle for WT and dark triangle for  $\Delta$ TPR1 mice). N=7-10 mice for each time point. Data analyzed using Two-Way ANOVA,

multiple comparisons corrected with Sidak's test. WT (WT/WT), HET (WT/ $\Delta$ TPR1),  $\Delta$ TPR1 ( $\Delta$ TPR1/ $\Delta$ TPR1). Data are mean  $\pm$ SEM (\* $p$ <0.05, \*\* $p$ <0.001, \*\*\* $p$ <0.0001). **J.**

**Figure 3. Hsp70 and Hsp90 is unaltered in  $\Delta$ TPR1 brain tissue and MEFs.**

**A.** Hsp90 $\beta$  mRNA expression in adult cortical brain tissue. **B.** Hsp70 mRNA expression in adult cortical brain tissue. (N=4). **C.** Representative Western Blots for Hsp90 and Hsp70 expression in male adult mice cortical tissue (N=4/genotype). **D-F.** Quantification of total Hsp90, Hsp90 $\beta$  or Hsp70 protein levels in WT, HET and  $\Delta$ TPR1 cortical tissue. **G.** Immunofluorescence analysis of the localization of Hsp90 (red); **H.** Hsp70 (red) and STI1 (green) in MEFs. Scale bar= 50  $\mu$ m.

**Figure 4. HSF1 and Hsp90 co-chaperones in aged  $\Delta$ TPR1 cortices.**

**A.** Representative immunoblots for Heat Shock Factor 1 (HSF1) and Hsp40 in cortical extracts. **B-C.** Densitometric quantification of HSF1 and Hsp40 protein levels respectively (N=4/genotype). **D.** Representative immunoblot for FKBP51 in WT and  $\Delta$ TPR1 male adult cortical extracts. **E.** Quantification of FKBP51 protein levels (N=5/genotype). **F.** Representative immunoblots of Hsp90 co-chaperones Aha1, p23, and Cdc37. **G-I** Densitometric quantification of Aha1, p23 and Cdc37 protein levels respectively (N=4/genotype). WT (WT/WT), HET (WT/ $\Delta$ TPR1),  $\Delta$ TPR1 ( $\Delta$ TPR1/ $\Delta$ TPR1). **J.** Immunoblot of STI1, CHIP and Pin1 in cortical lysates. **K. & L.** Densitometric quantification of CHIP and Pin1. **M. & N.** Cyclophilin A (CypA) protein expression in cortical lysates and quantification. (N=4 for WT and  $\Delta$ TPR1 and N=4 for HET for CHIP and N=8 for all genotypes for Pin1). All data are Mean  $\pm$  S.E.M. \* $p$ <0.05, \*\* $p$ <0.01, \*\*\*  $p$ <0.0001.

**Figure 5. Disturbed client protein levels in aged  $\Delta$ TPR1 mouse brain.**

**A.** Representative immunoblots for glucocorticoid receptor (GR) and STI1 in aged cortical lysates and actin loading control in male cortical lysates. **B.** Quantification of glucocorticoid receptor levels (N=8/genotype). **C.** Confocal image of Glucocorticoid receptor expression in cortex of 15-18-month-old mice (63x). Zoom inset of 1.5. Scale bar 10  $\mu$ m. **D-F.** Tau and GRK2 protein expression in cortical lysates. **F.** Quantification of total tau levels (N=4/genotype). **F.** Quantification of GRK2 levels in cortical brain

006 homogenates (N=7/genotype). Data are Mean  $\pm$  S.E.M. \*p<0.05, \*\*p<0.01, \*\*\* p<0.0001. **G.** Representative  
007 immunoblots probing for the levels of GR and Pin1 hippocampal lysates from 15-18-month-old mice. **H. & I.**  
008 Quantification of GR and Pin1 levels (N=4 for all blots). **J. & K.** Representative images of GR staining in CA3  
009 and CA1 of 18-month-old WT and  $\Delta$ TPR1 male mice. WT (WT/WT), HET (WT/ $\Delta$ TPR1),  $\Delta$ TPR1  
010 ( $\Delta$ TPR1/ $\Delta$ TPR1). All data are Mean  $\pm$  S.E.M. \*p<0.05, \*\*p<0.01, \*\*\* p<0.0001.

011  
012 **Figure 6. CRISPR/Cas9 SN56-STI1 KO cells have similar disruption of client and co-chaperone**  
013 **expression as  $\Delta$ TPR1 mice.**

014 **A.** Representative immunoblots for panHsp90, STI1 and Hsp70 expression in SN56 cells. **B-D.**  
015 Densitometric quantification of Hsp90, STI1 and Hsp70 protein expression relative to WT cells. **E.**  
016 Representative immunoblots for glucocorticoid receptor, STI1 and CHIP in SN56-STI1 KO cells (images from  
017 the same blot, just cropped due to spaces left between samples) **F.** Quantification of GR levels. **G.**  
018 Quantification of CHIP levels. **H.** Representative immunoblots for GRK2, FKBP51 and CypA protein levels. **I-**  
019 **K.** Densitometric quantification of GRK2, FKBP51 and CypA protein levels respectively (images from the  
020 same blot, just cropped due to spaces left between samples). **L.** Rescue experiments with HA-tagged STI1. **M-**  
021 **P.** Quantification by densitometry for GR, Pin1, CHIP and CypA respectively. Data analyzed using Student's t-  
022 test (N=4 dishes)- for N-P, One-way ANOVA. STI1-KO in immunoblots represents the SN56-STI1 KO cells.  
023 All data are Mean  $\pm$  S.E.M. \*p<0.05, \*\*p<0.01, \*\*\* p<0.0001.

024  
025 **Figure 7. Reduced viability of cells with dysfunctional STI1.**

026 **A.** Live-Dead assay in WT and SN56-STI1 KO cells and data calculated as the percentage of dead cells  
027 (# of dead cells/#dead+#live cells). **B.** CellTiter-Glo Luminescent Cell Viability Assay in SN56-STI1 KO cells  
028 treated with 10  $\mu$ M Thapsigargin in complete media for 24 h. **C.** Live-Dead Assay in P4 MEFs from  $\Delta$ TPR1  
029 mice. Scale bars 100  $\mu$ m. **D.** Percentage of cell death. **E.** MEFs from  $\Delta$ TPR1 mice were treated with 30  $\mu$ M  
030 BrdU for 1.5h, and then fixed and stained for BrdU. **F.** Quantification of percentage of BrdU positive  
031 nuclei/total nuclei analysis to assess MEF proliferation (Scale bars 50  $\mu$ m) (N=4-5 independent MEF

032 cultures/genotype, Data analyzed with Student's t-test). WT (WT/WT),  $\Delta$ TPR1 ( $\Delta$ TPR1/ $\Delta$ TPR1). All data are  
033 Mean  $\pm$  S.E.M. \* $p$ <0.05, \*\* $p$ <0.01, \*\*\*  $p$ <0.0001.

034  
035 **Figure 8. Neurodegeneration in aged  $\Delta$ TPR1 mice.**

036 **A, C, E.** Silver staining in 15-18-month-old male mice. **A.** Representative images of silver staining in  
037 the dentate gyrus (at 20X magnification). Raw image and deconvoluted/thresholded image are shown to  
038 visualize silver particles. **B.** Quantitative analysis of silver particles in dentate gyrus (N=4/genotype). **C.** Silver  
039 staining in the CA1 region. **D.** Quantification of silver staining in the CA1 region. **E.** Silver staining in CA3  
040 subfields, CA3a, CA3b and CA3c. Arrows indicate noticeable thinning of CA3 neuronal layer in  $\Delta$ TPR1 mice  
041 compared to littermate controls. **F-I.** Quantitative analysis of silver particles in hippocampal CA3 region. WT  
042 (WT/WT),  $\Delta$ TPR1 ( $\Delta$ TPR1/ $\Delta$ TPR1). All data are Mean  $\pm$  S.E.M. \* $p$ <0.05 Student's t-test. Scale bars 50  $\mu$ m.

043  
044 **Figure 9. Age -dependent neuronal loss in CA3 region of the hippocampus.** **A.** Representative  
045 micrographs of NeuN staining in CA3 region of 3-5-month-old male mice (at 10X magnification). **B-D.**  
046 Average NeuN positive neurons in all CA3 subfields per section. (N=4-5 animals/genotype). **E.** NeuN staining  
047 in the CA3 region of 15-18-month-old mice (at 10X magnification). **F-H.** Average NeuN positive neurons per  
048 section relative to WT. Data analyzed using Student's t-test (N=4-5/genotype). **I.** ST11 expression in  
049 hippocampal lysates from C57BL/6 male mice at 4 months and 15 months of age. **J.** Densitometric  
050 quantification of ST11 protein levels, normalized to control and relative to actin. WT (WT/WT),  $\Delta$ TPR1  
051 ( $\Delta$ TPR1/ $\Delta$ TPR1). All data are Mean  $\pm$  S.E.M. \* $p$ <0.05, \*\* $p$ <0.01, \*\*\*  $p$ <0.0001. Scale bars represent 50  $\mu$ m  
052 for 20X images and 150  $\mu$ m for 10X images.

053  
054 **Figure 10. Spatial memory deficits in  $\Delta$ TPR1 mice.**

055 Spatial Morris Water Maze test in 9-month-old mice. **A-C.** Measures of learning during the acquisition  
056 phase of the task. This is measured by latency to find the target platform **A.**, average distance travelled to reach  
057 platform **B.**, and mean speed (m/s) travelled before reaching platform **C.** **D.** Represents the probe trial in which

058 the mouse is placed in pool without platform and percentage of time spent in each quadrant is recorded.  
059 (T=target quadrant, O=opposite quadrant, L=left, R=right- with respect to target quadrant). Data analyzed using  
060 Two-Way ANOVA Repeat Measures. (n=9-10/genotype).

061  
062 **Supplementary Table 1: Analysis of probability of loss-of-function (pLI) score for *STI1*,**  
063 ***HSP90AA1*, *HSP90AB1*, and other Hsp90 co-chaperones from publicly available databases for healthy**  
064 **and diseased patients:** Genetic information of *STI1*, *HSP90AA1*, *HSP90AB1*, *PTGES3*, *AHSA1*, *FKBP5*, *PIN1*,  
065 *STUB1*, *CDC37*, *PPIA*, *PPP5C*, and *SGTA*, aggregated using publically available databases and repositories of  
066 healthy controls and disease-ascertained individuals.

067  
068 **Supplementary Figure 1. Unaltered Transcriptome in  $\Delta$ TPR1 mice.** Transcriptional changes  
069 between RNA samples from the cortex of 5 *STI1* WT and 5 *STI1*  $\Delta$ TPR1 mice were analyzed by long RNA-  
070 sequencing. Bioinformatic analysis showed minimal variance between the samples in both **A)** sample distance  
071 matrix and **B)** principal component analysis.

093  
094  
095  
096

**Table 1** Metabolic parameters of mutant mice and littermate controls

|                            | Light                |                       | Dark                 |                       |
|----------------------------|----------------------|-----------------------|----------------------|-----------------------|
|                            | WT (N=)              | $\Delta$ TPR1 (N=8)   | WT (N=7)             | $\Delta$ TPR1 (N=8)   |
| Food intake (g)            | 1.137 $\pm$ 0.24     | 1.42 $\pm$ 0.22       | 1.64 $\pm$ 0.25      | 2.10 $\pm$ 0.29       |
| Water (ml)                 | 1.15 $\pm$ 0.24      | 1.34 $\pm$ 0.22       | 2.15 $\pm$ 0.24      | 2.45 $\pm$ 0.16       |
| Amb. act. (counts/h)       | 366.07 $\pm$ 56.47   | 744.93 $\pm$ 149.93*  | 2197.63 $\pm$ 210.08 | 4666.06 $\pm$ 1139.59 |
| Total act. (counts/h)      | 1201.36 $\pm$ 146.92 | 1809.30 $\pm$ 257.74* | 4445.30 $\pm$ 413.56 | 7904.40 $\pm$ 1617.05 |
| VO <sub>2</sub> (mL/kg/h)  | 1959.53 $\pm$ 75.42  | 2544.97 $\pm$ 979.28  | 2284.56 $\pm$ 47.09  | 3183.77 $\pm$ 95.91   |
| VCO <sub>2</sub> (mL/kg/h) | 1679.03 $\pm$ 113.34 | 2321.37 $\pm$ 122.71  | 2047.50 $\pm$ 71.89  | 3005.79 $\pm$ 90.35   |
| EE (kcal/h)                | 0.42 $\pm$ 0.02      | 0.38 $\pm$ 0.02       | 0.50 $\pm$ 0.02      | 0.48 $\pm$ 0.01       |
| RER                        | 0.85 $\pm$ 0.03      | 0.91 $\pm$ 0.03       | 0.90 $\pm$ 0.02      | 0.95 $\pm$ 0.03       |
| Body weight                | 44.24 $\pm$ 1.47     | 30.54 $\pm$ 0.92****  |                      |                       |
| Sleep time                 | 432.14 $\pm$ 16.74   | 400.63 $\pm$ 21.71    | 250.00 $\pm$ 16.22   | 165.25 $\pm$ 23.81    |

097 Ambulatory activity (Amb. act.) and Total activity (Total act.). EE, energy expenditure; RER, respiratory  
098 exchange ratio.

099 \*p < 0.05 and \*\*\*\*p < 0.0001 (WT vs.  $\Delta$ TPR1).  
100  
101  
102  
103  
104  
105  
106  
107  
108  
109  
110  
111  
112  
113  
114  
115  
116  
117  
118  
119  
120  
121  
122  
123  
124  
125  
126



127 **Table 2-** pLi score generated from human genetic data of Hsp90 co-chaperones, known function and  
 128 comparison to published knock-out mouse models.

| <i>Human Gene(protein)</i>           | <i>Protein function</i>                                                                                                                                                                | <i>pLi Score (Human)</i> | <i>Mouse Model phenotypes</i>                                                                                   |
|--------------------------------------|----------------------------------------------------------------------------------------------------------------------------------------------------------------------------------------|--------------------------|-----------------------------------------------------------------------------------------------------------------|
| <b><i>STIP1 (STI1/STIP1/HOP)</i></b> | Co-chaperone that physically links Hsp70 and Hsp90 (Rohl, Tippel, et al., 2015; Rohl, Wengler, et al., 2015; Schmid et al., 2012b)                                                     | 1                        | Embryonically lethal at day 10.5 (Beraldo et al., 2013)                                                         |
| <b><i>HSP90AA1 (Hsp90 α)</i></b>     | Molecular chaperone responsible for several clients that include or are involved in:<br>Steroid hormone receptors, cell cycle regulation, signal transduction<br>Inducible isoform.    | 0.68                     | Mice viable, but males have deficits in spermatogenesis (Grad et al., 2010)                                     |
| <b><i>HSP90AB1 (Hsp90 β)</i></b>     | Molecular chaperone responsible for several clients that include or are involved in:<br>Steroid hormone receptors, cell cycle regulation, signal transduction<br>Constitutive isoform. | 1                        | Embryonically lethal (Voss et al., 2000)                                                                        |
| <b><i>PTGES3(p23)</i></b>            | Co-chaperone that enters the Hsp90 cycle late to reduce Hsp90 ATPase activity                                                                                                          | >0.9                     | Postnatal mice die early due to defective lung development (Grad et al., 2006)                                  |
| <b><i>AHSA1(Aha1)</i></b>            | Activates Hsp90 ATPase activity regulating the chaperone cycle and it can also displace STI1 (J. Li, Soroka, & Buchner, 2012; Retzlaff et al., 2010)                                   | 0.94                     | N/A                                                                                                             |
| <b><i>FKBP5(FKBP51)</i></b>          | A proline-cis/trans isomerase that is part of the Hsp90 chaperone network                                                                                                              | 0.5                      | Viable (Yong, Yang, et al., 2007)                                                                               |
| <b><i>CDC37(Cdc37)</i></b>           | Co-chaperone that is required for the recruitment and maturation of kinases (MacLean & Picard, 2003)                                                                                   | 0.96                     | Mice data unavailable<br>Loss of <i>CDC37</i> is lethal in <i>C. elegans</i> and yeast (Beers & Kempfues, 2006) |
| <b><i>SGTA(SGTA)</i></b>             | Hsp90 co-chaperone that handles clients<br>Ubiquitin ligase (Zhang et al., 2008)                                                                                                       | 0.47                     | Viable (Philp et al., 2016)                                                                                     |
| <b><i>PPP5c(PP5)</i></b>             | Phosphatase (Connarn et al., 2014; Wandinger, Suhre, Wegele, & Buchner, 2006{ Connarn, 2014 #763)                                                                                      | 1                        | Knockout mice for <i>PPP5c</i> are viable (Yong, Bao, et al., 2007)                                             |

129  
130  
131  
132

133  
134  
135  
136  
137  
138  
139  
140  
141  
142  
143  
144  
  
145  
  
146  
  
147  
  
148  
  
149  
  
150  
  
151  
  
152  
  
153  
  
154  
  
155  
  
156  
  
157  
  
158  
  
159  
  
160  
  
161  
  
162  
  
163  
  
164  
  
165  
  
166  
  
167  
  
168

**Figure 1**

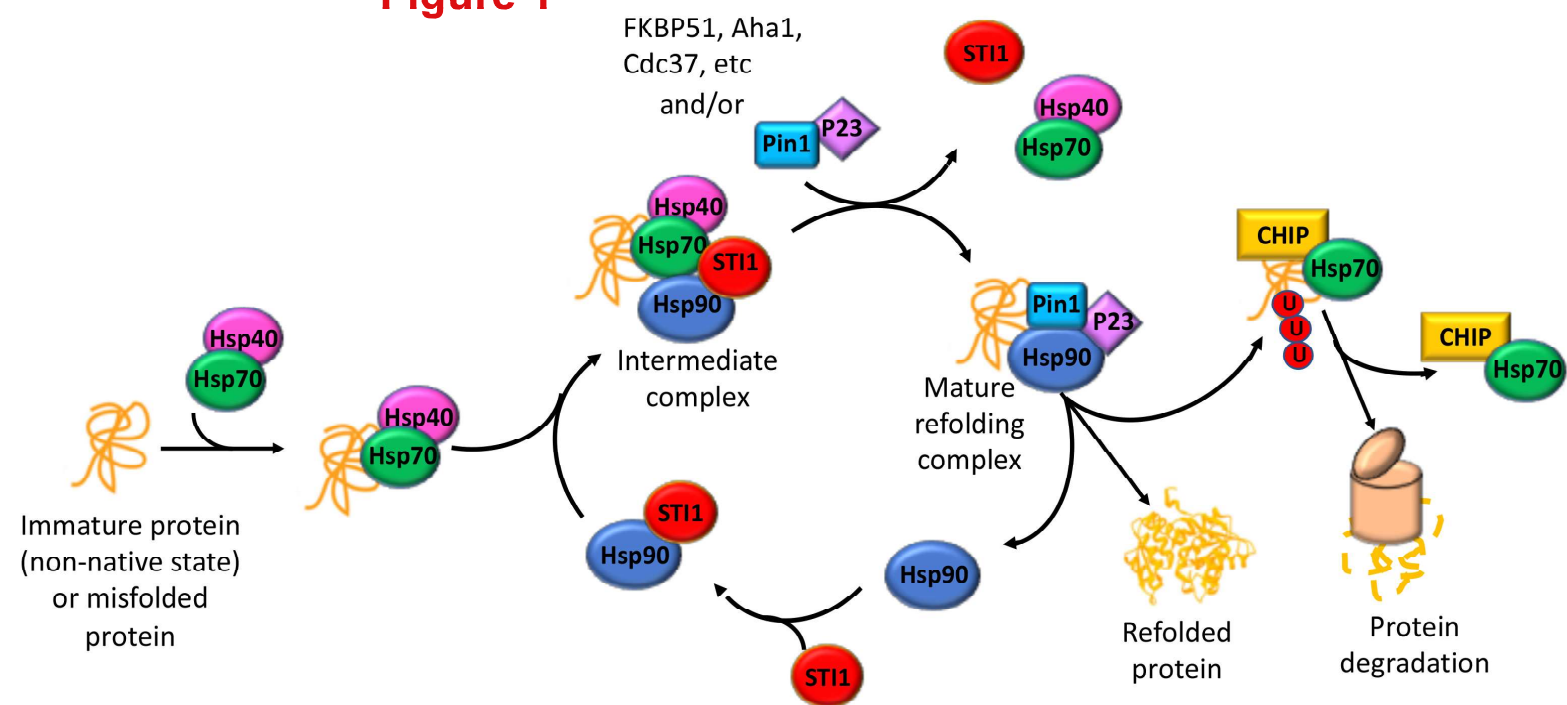

**Figure 2**

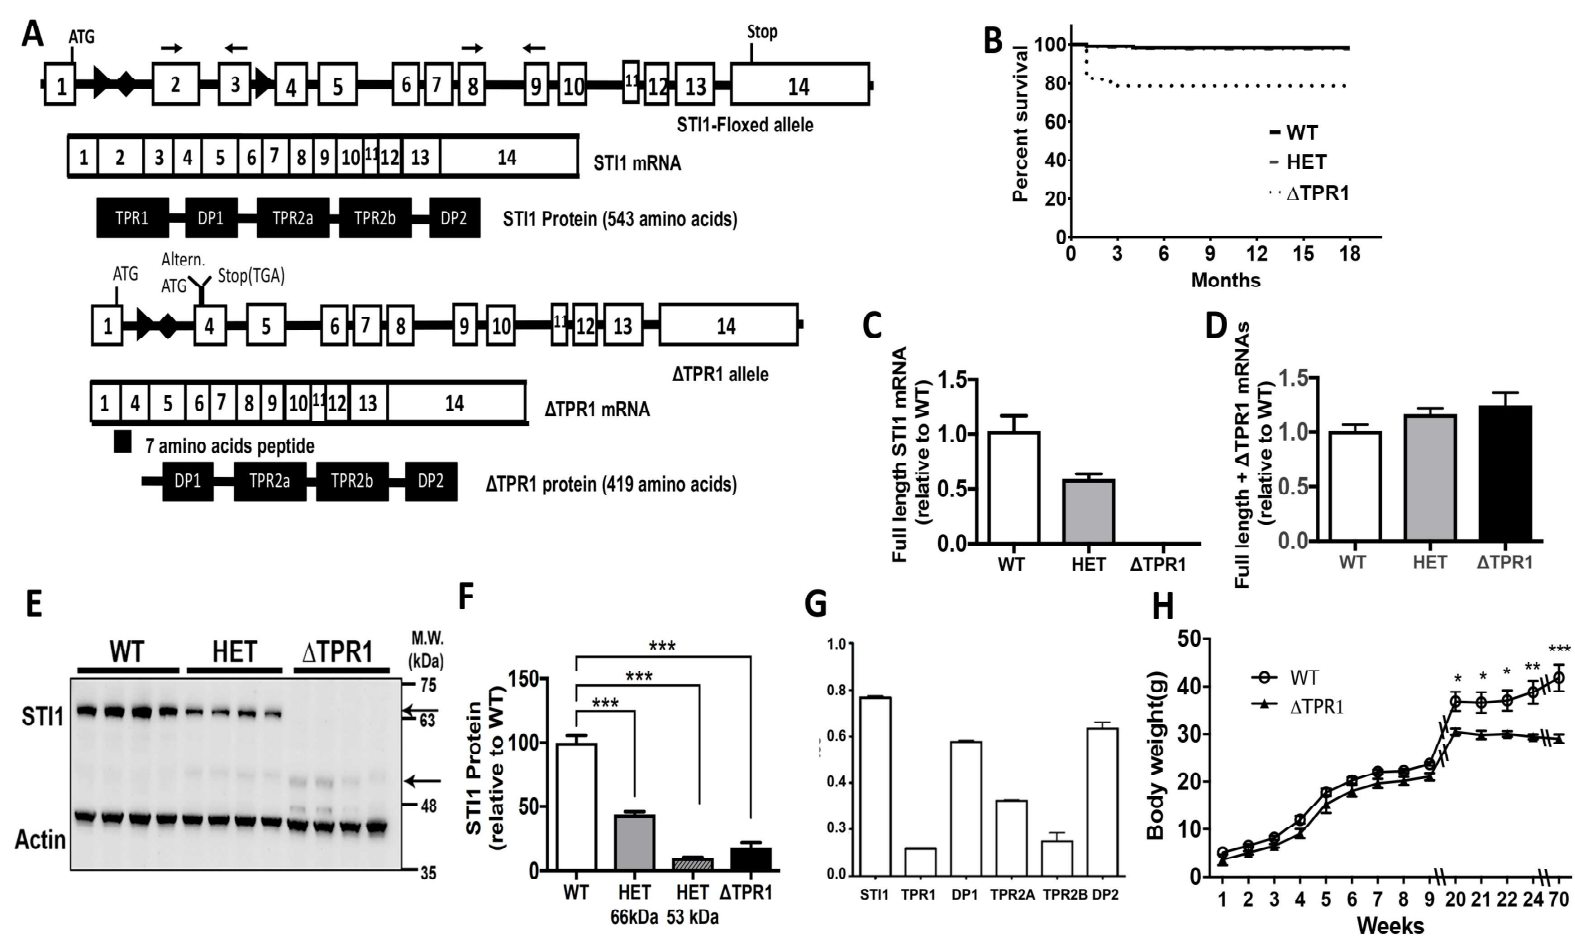

**Figure 3**

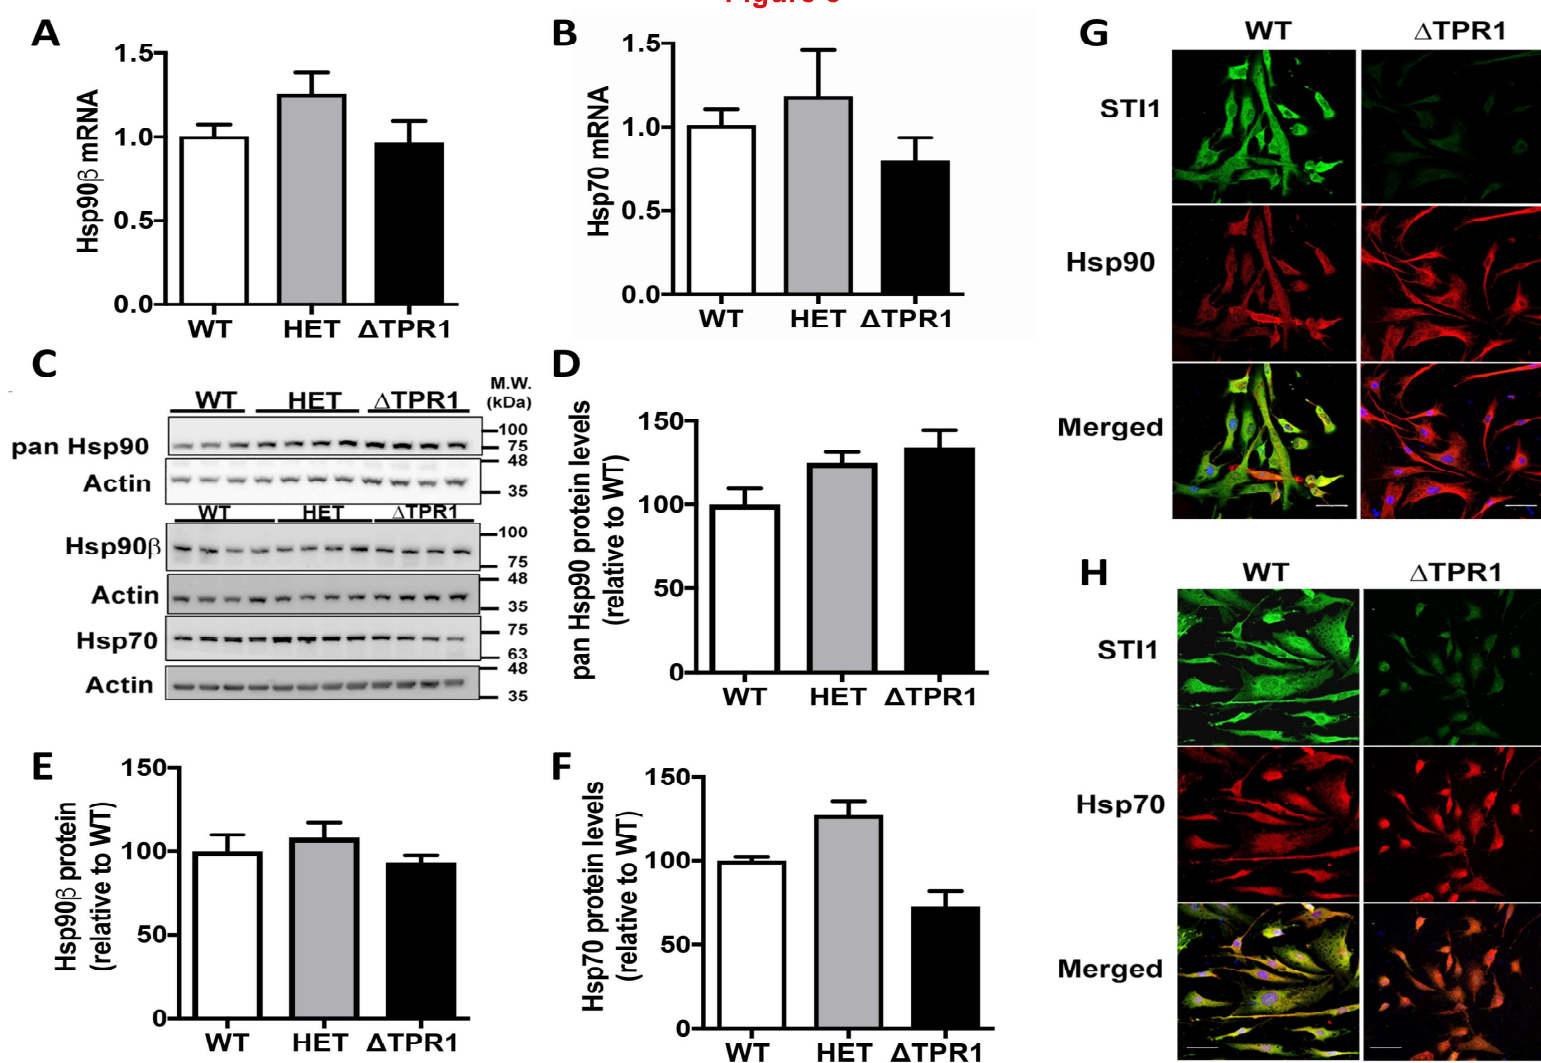

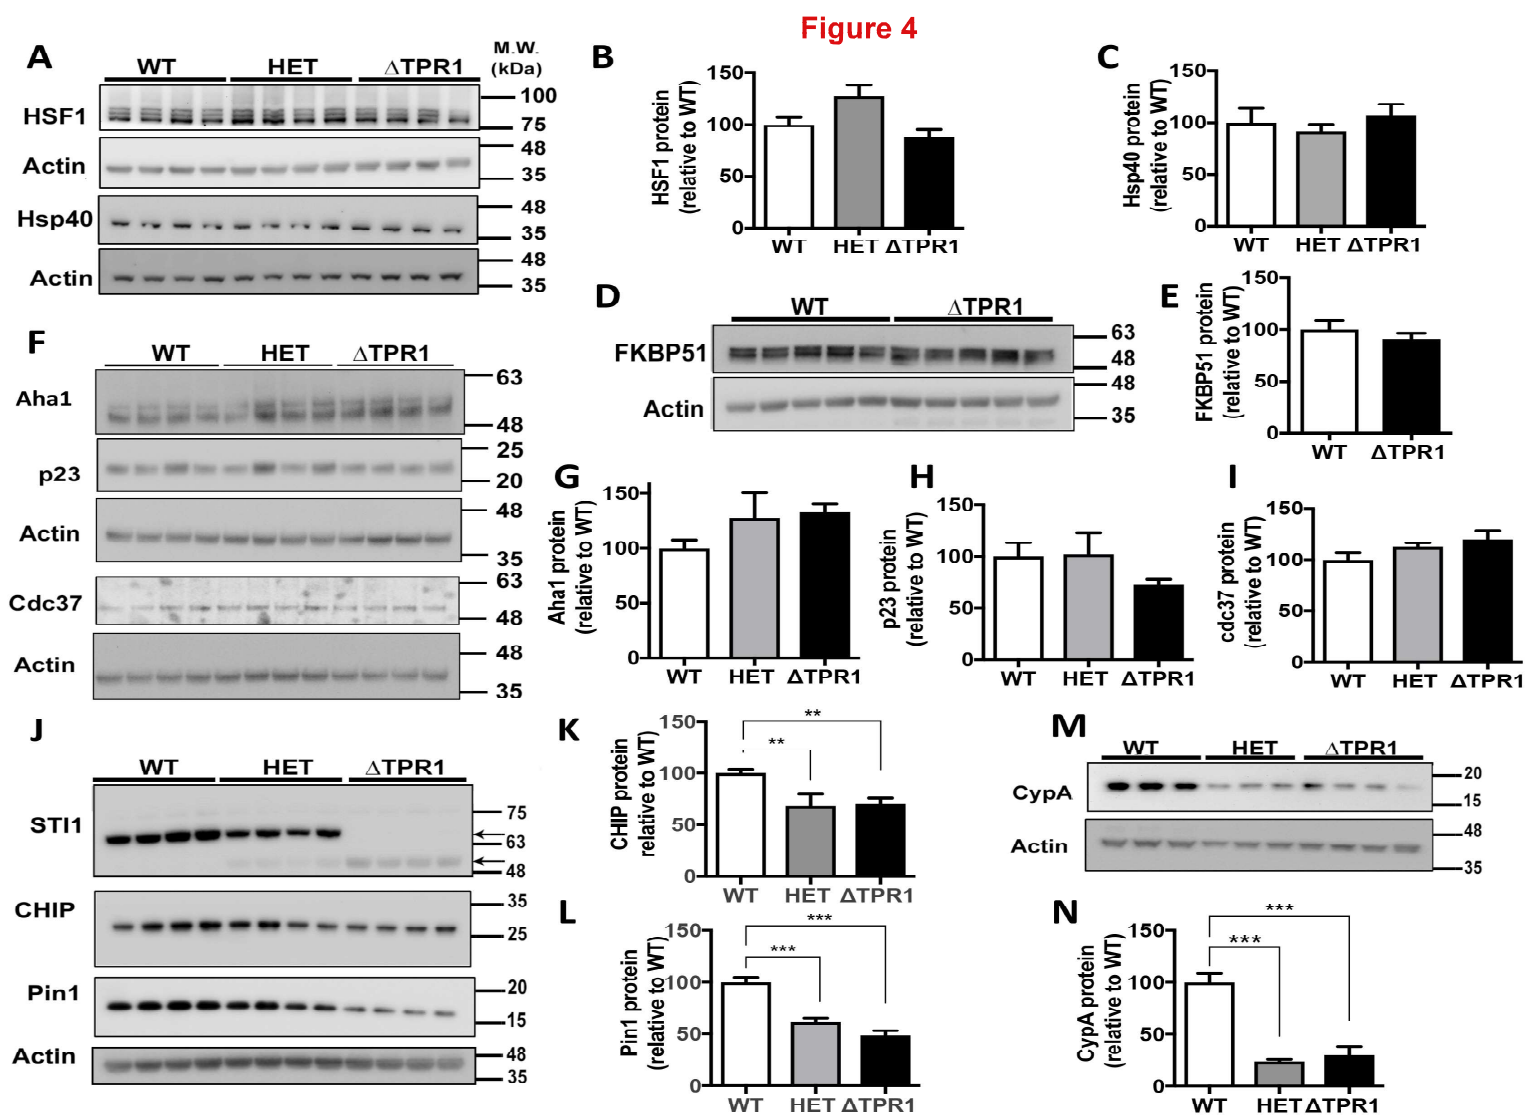

**Figure 5**

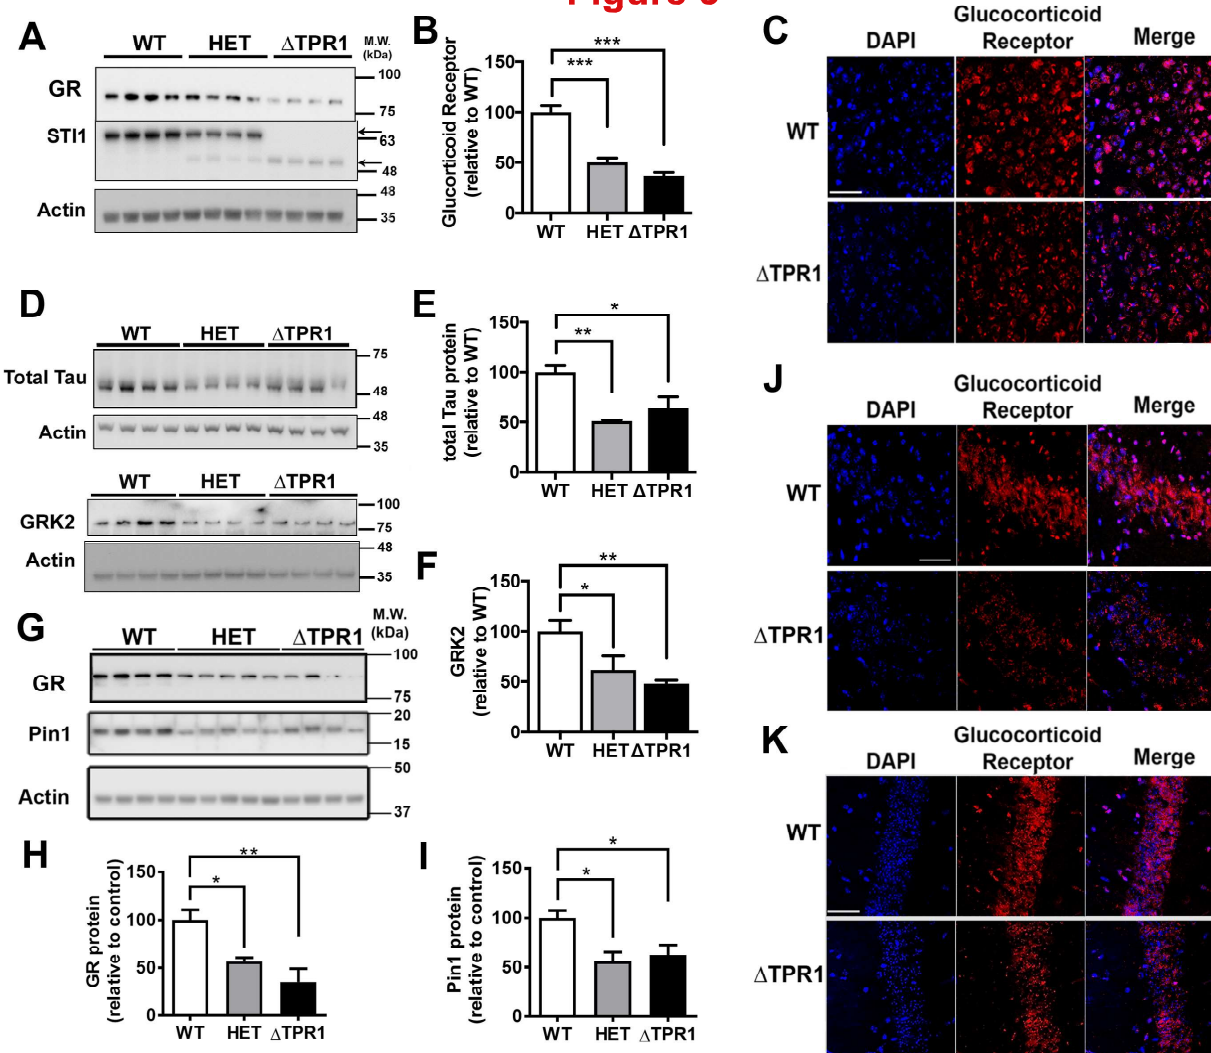

**Figure 6**

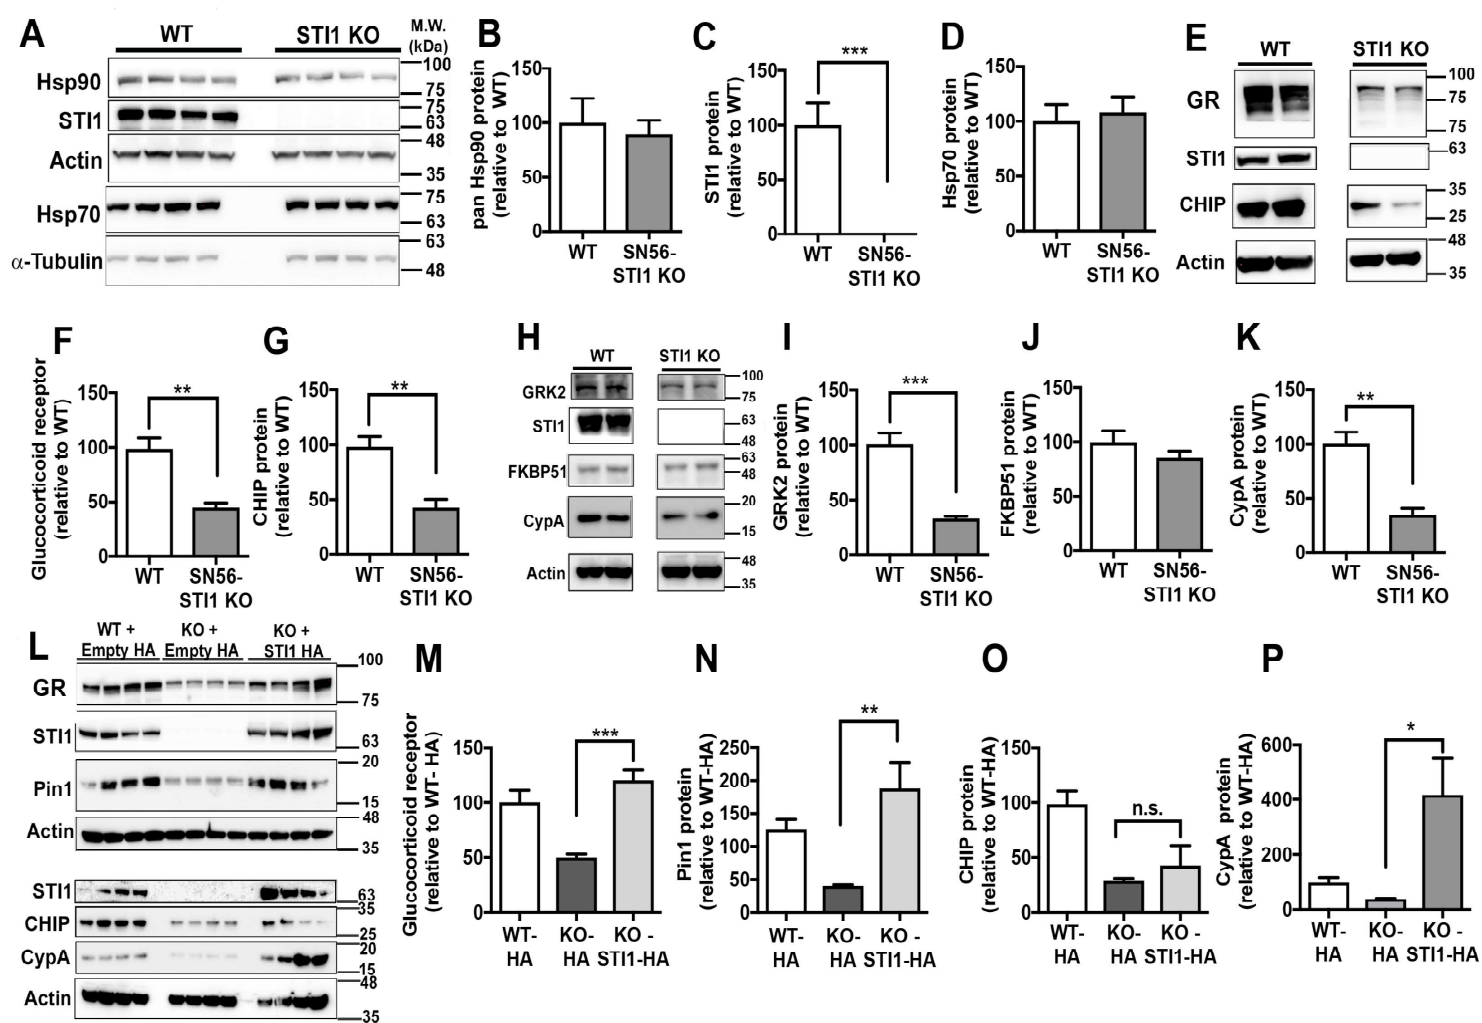



**Figure 7**

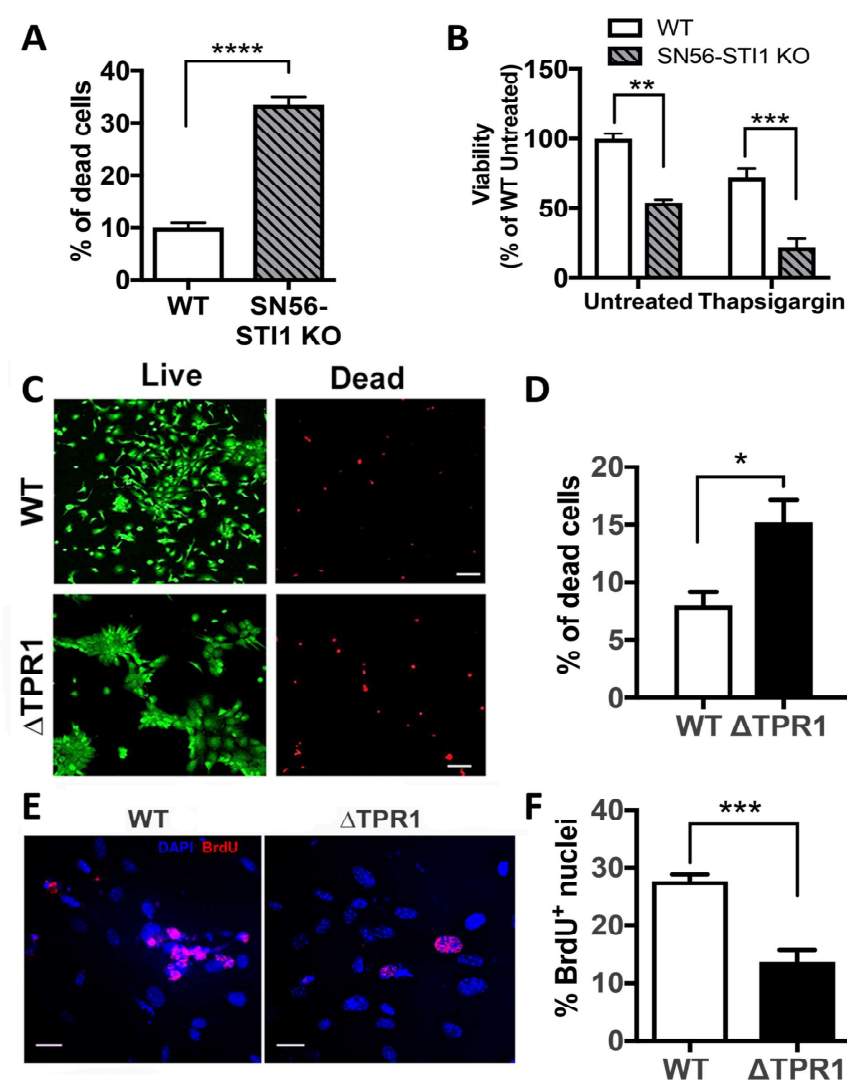

**Figure 8**

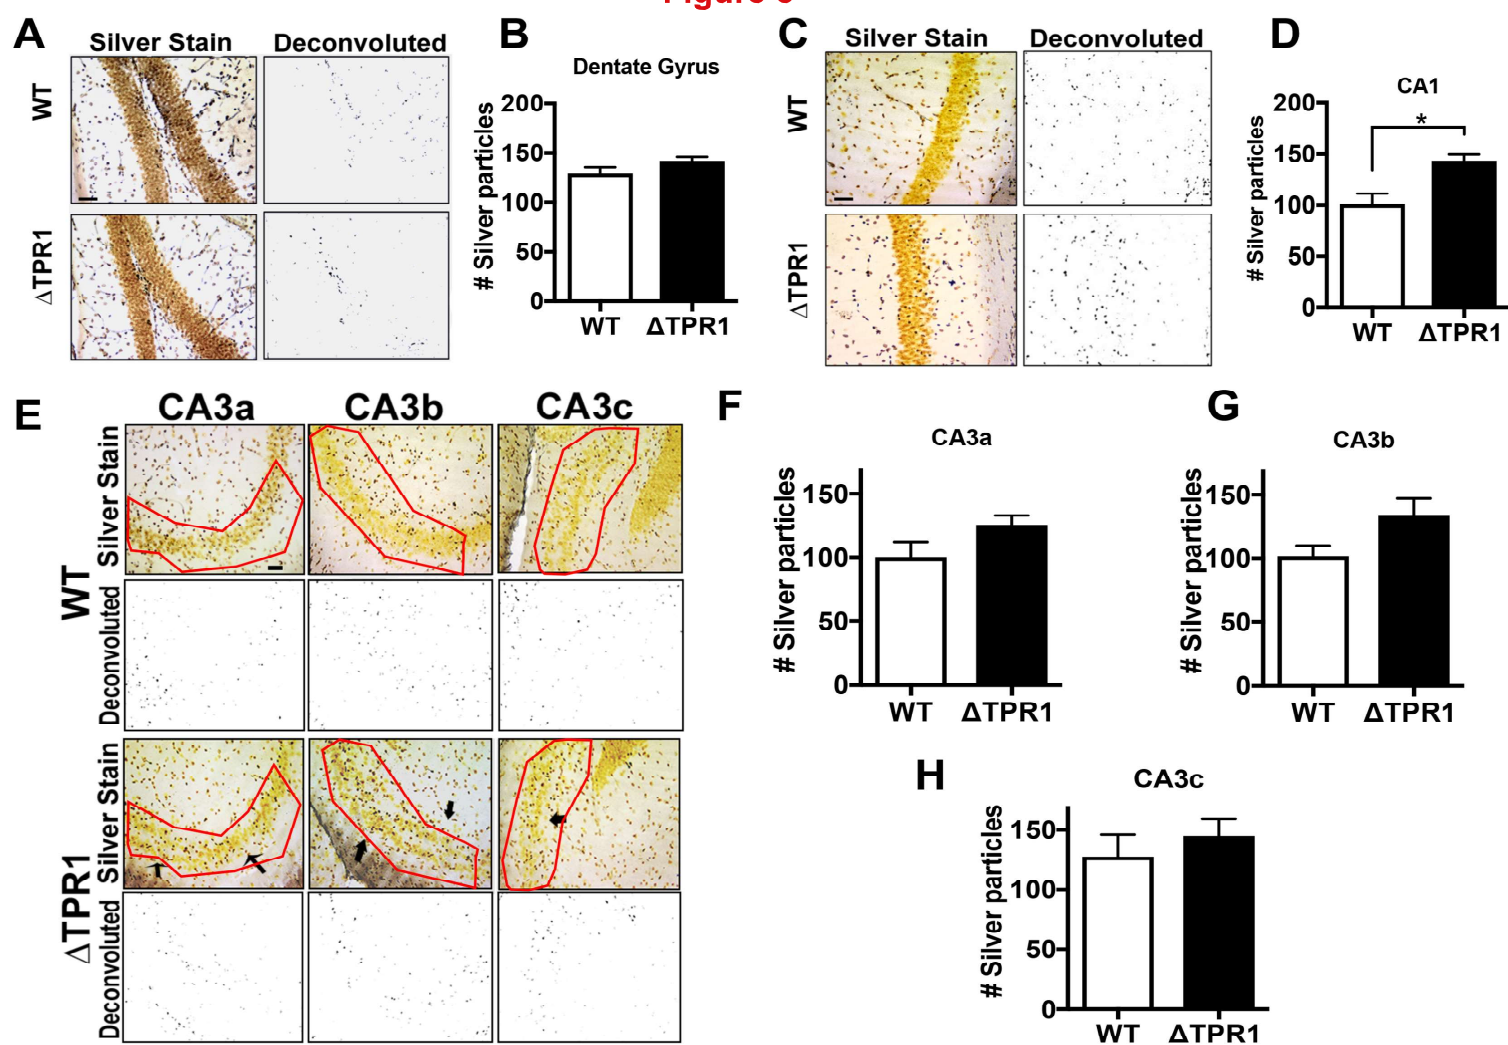

**Figure 9**

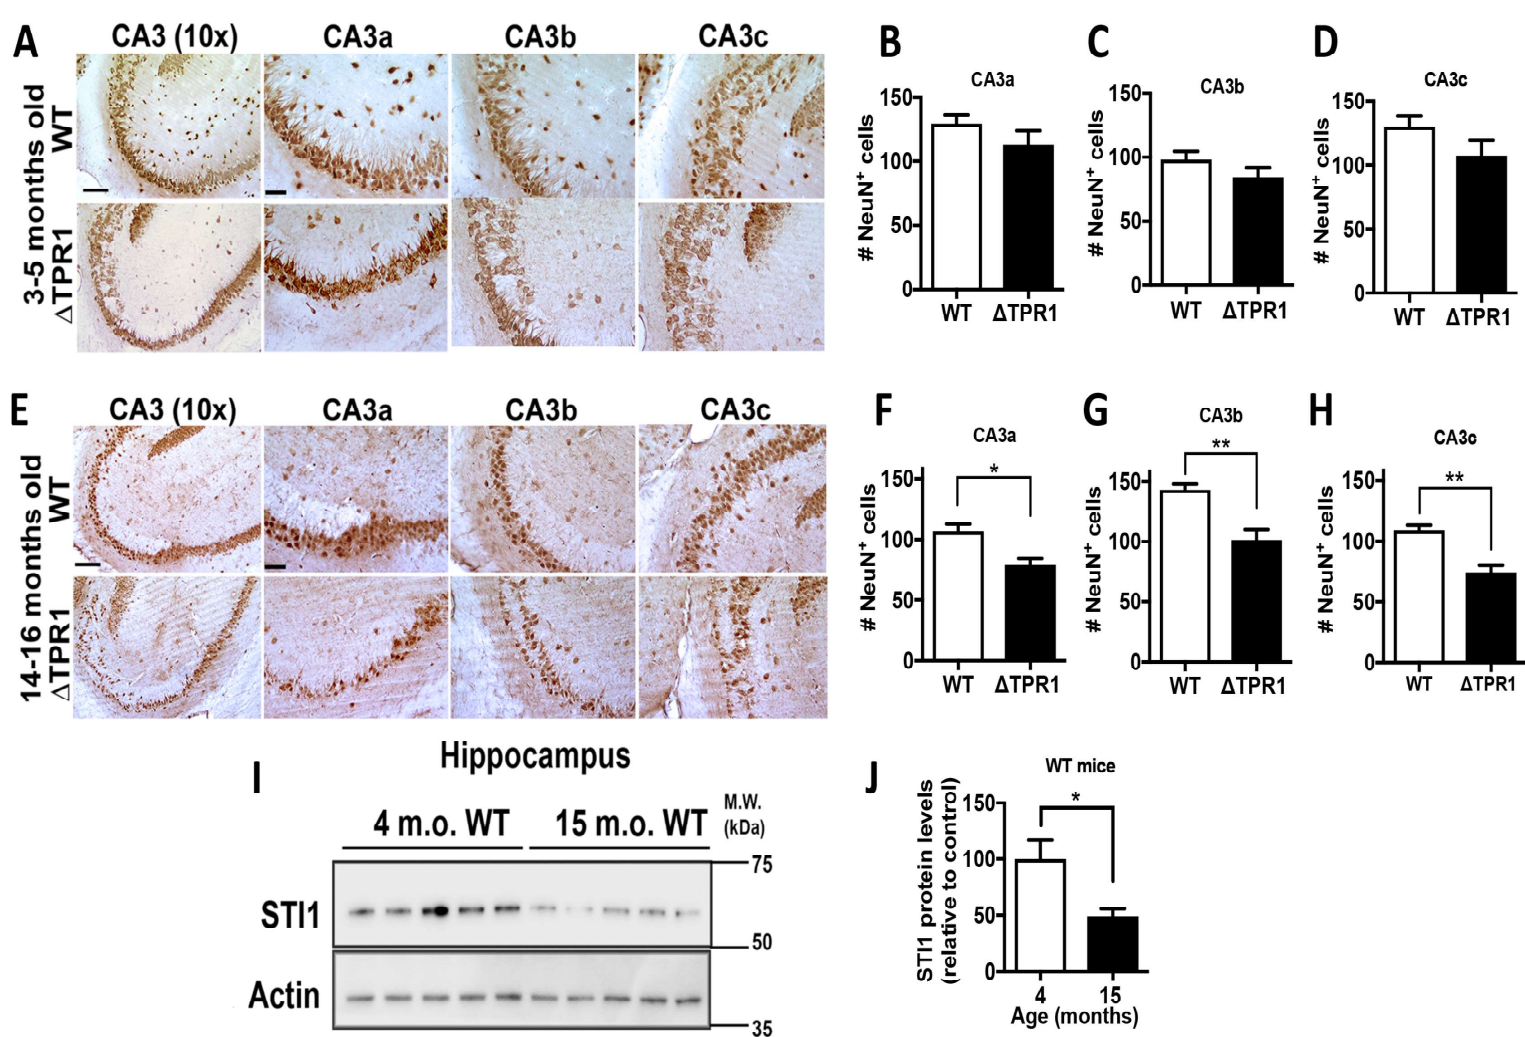

Figure 10

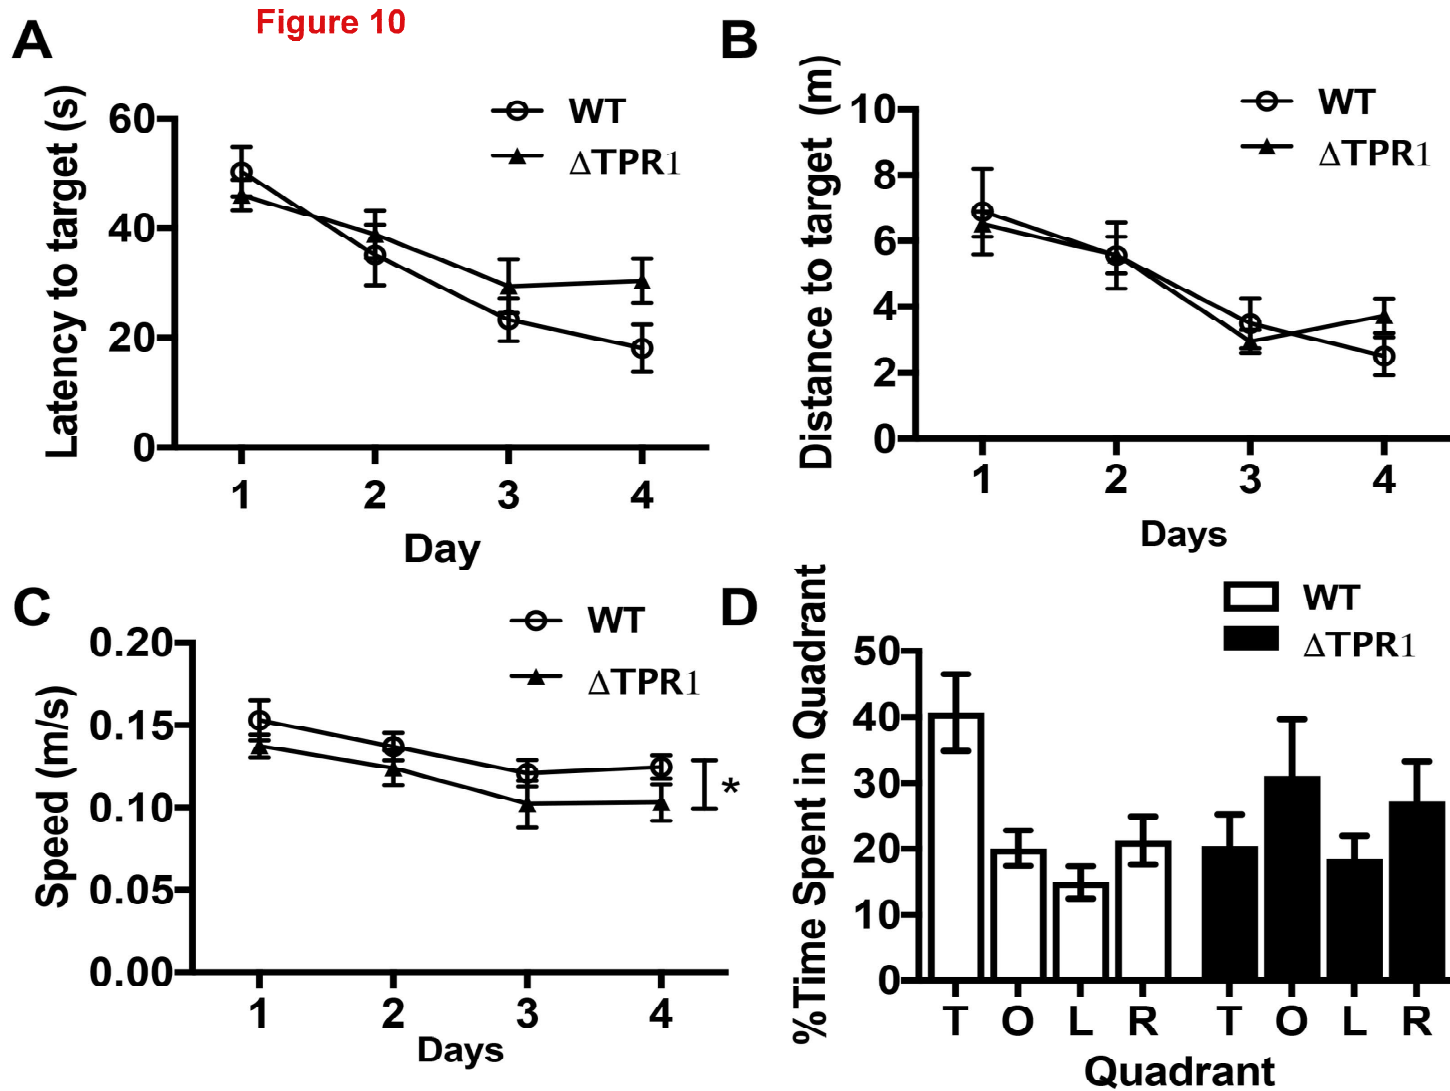

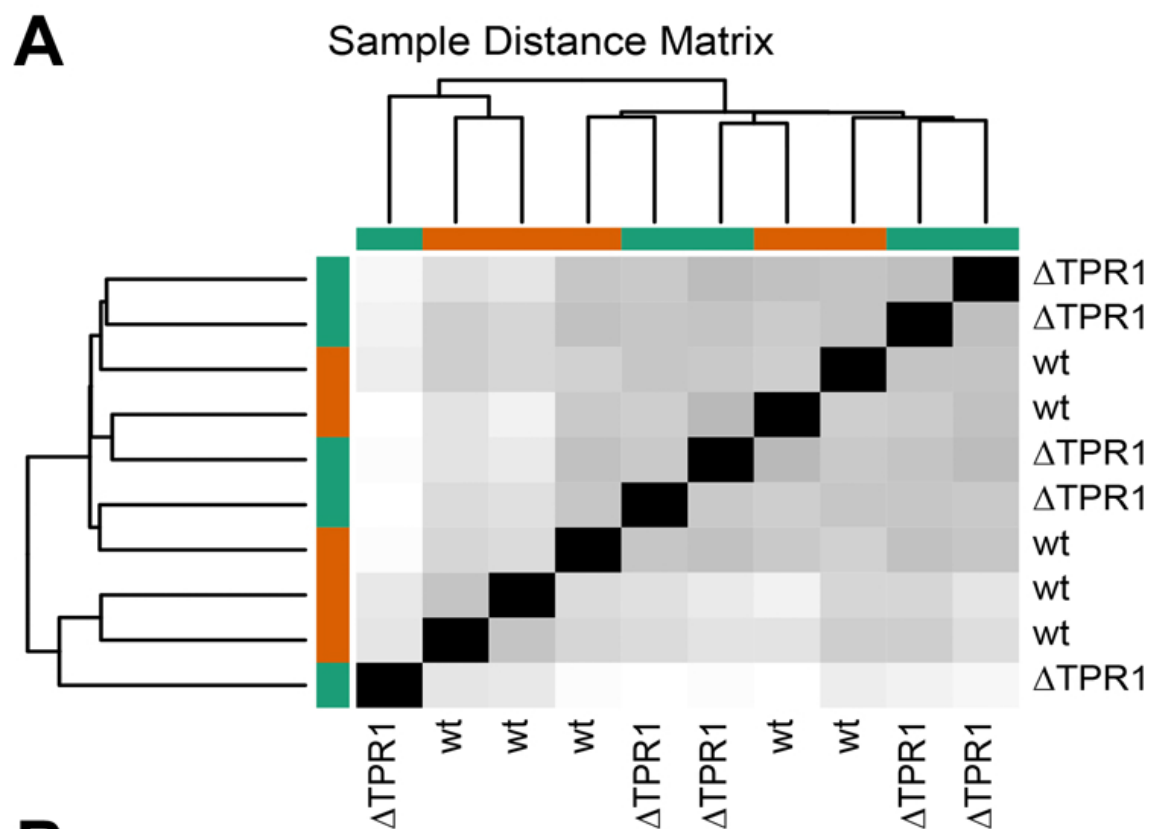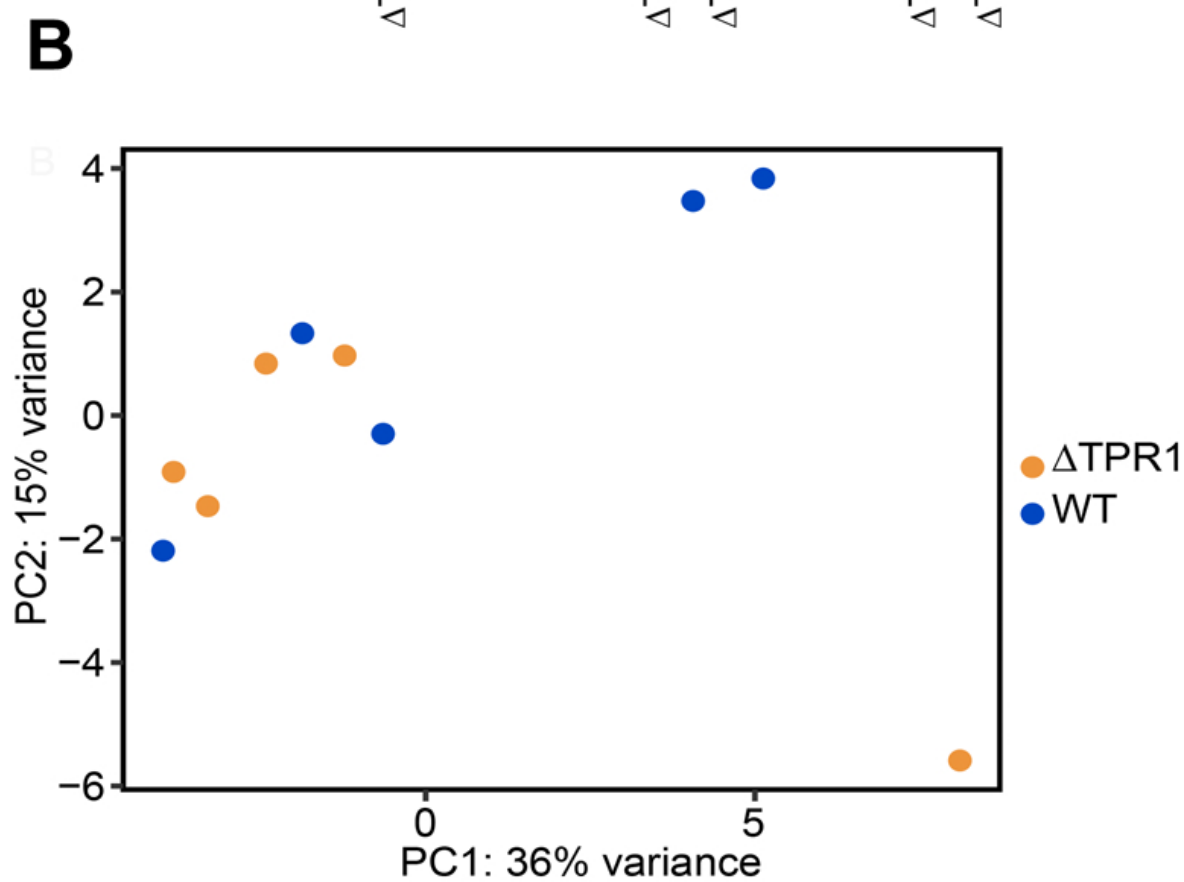

**Supplementary Table 1. Analysis of probability of loss-of-function (pLI) score for *STIP1*, *HSP90AA1*, *HSP90AB1*, and other Hsp90 co-chaperones from publicly available databases for healthy and diseased patients.**

| Database           | Reference                             | Type of database (sample size) | Genetic information                                                                                                                                                                                                                                                                                                                                                                                                                                                                                                                                                                                                                                                                                                                                                                                                                                                                                                                                                                                                                                                                                                                                                                                                                                                                                                                                                                                                                                                                                                                                                                                                                                                                                                                                                                                                                                                                                                                                                                                                                                                                                                     |         |           |             |                                       |         |           |            |                                      |                    |                                      |             |                                      |             |                                       |                   |                                       |                    |                                       |                    |                                       |                    |                                       |         |           |                   |                                       |             |                                       |
|--------------------|---------------------------------------|--------------------------------|-------------------------------------------------------------------------------------------------------------------------------------------------------------------------------------------------------------------------------------------------------------------------------------------------------------------------------------------------------------------------------------------------------------------------------------------------------------------------------------------------------------------------------------------------------------------------------------------------------------------------------------------------------------------------------------------------------------------------------------------------------------------------------------------------------------------------------------------------------------------------------------------------------------------------------------------------------------------------------------------------------------------------------------------------------------------------------------------------------------------------------------------------------------------------------------------------------------------------------------------------------------------------------------------------------------------------------------------------------------------------------------------------------------------------------------------------------------------------------------------------------------------------------------------------------------------------------------------------------------------------------------------------------------------------------------------------------------------------------------------------------------------------------------------------------------------------------------------------------------------------------------------------------------------------------------------------------------------------------------------------------------------------------------------------------------------------------------------------------------------------|---------|-----------|-------------|---------------------------------------|---------|-----------|------------|--------------------------------------|--------------------|--------------------------------------|-------------|--------------------------------------|-------------|---------------------------------------|-------------------|---------------------------------------|--------------------|---------------------------------------|--------------------|---------------------------------------|--------------------|---------------------------------------|---------|-----------|-------------------|---------------------------------------|-------------|---------------------------------------|
| ExAC               | Lek et al., 2016                      | Controls (n=60,706)            | <p><i>STIP1</i></p> <ul style="list-style-type: none"> <li>• pLI = 1.00, extremely intolerant of loss of function variants</li> <li>• 10 heterozygous PTVs, 0 homozygous PTVs</li> <li>• 1 variant likely to be a true PTV</li> </ul> <table border="1"> <thead> <tr> <th>Variant</th> <th>Frequency</th> </tr> </thead> <tbody> <tr> <td>p.Tyr269Ter</td> <td>1 in 60,650 individuals, 0.000008245%</td> </tr> </tbody> </table> <p><i>HSP90AA1</i></p> <ul style="list-style-type: none"> <li>• pLI = 0.68, may tolerate loss of function variants</li> <li>• 16 heterozygous PTVs, 0 homozygous PTVs</li> <li>• 8 variants likely to be true PTVs</li> </ul> <table border="1"> <thead> <tr> <th>Variant</th> <th>Frequency</th> </tr> </thead> <tbody> <tr> <td>p.Trp82Ter</td> <td>1 in 60,702 individuals, 0.00001647%</td> </tr> <tr> <td>p.Gln101ArgfsTer22</td> <td>1 in 60,702 individuals, 0.00001647%</td> </tr> <tr> <td>p.Gln107Ter</td> <td>7 in 60,699 individuals, 0.00005766%</td> </tr> <tr> <td>p.Ser287Ter</td> <td>1 in 60,525 individuals, 0.000008261%</td> </tr> <tr> <td>p.Lys372ArgfsTer7</td> <td>1 in 55,933 individuals, 0.000008939%</td> </tr> <tr> <td>p.Arg477LysfsTer18</td> <td>1 in 60,666 individuals, 0.000008242%</td> </tr> <tr> <td>p.Lys479ArgfsTer20</td> <td>1 in 60,674 individuals, 0.000008241%</td> </tr> <tr> <td>p.Lys681SerfsTer16</td> <td>1 in 60,241 individuals, 0.000008300%</td> </tr> </tbody> </table> <p><i>HSP90AB1</i></p> <ul style="list-style-type: none"> <li>• pLI = 1.00, extremely intolerant of loss of function variants</li> <li>• 4 heterozygous PTVs, 0 homozygous PTVs</li> <li>• 2 variants likely to be true PTVs</li> </ul> <table border="1"> <thead> <tr> <th>Variant</th> <th>Frequency</th> </tr> </thead> <tbody> <tr> <td>p.Lys481GlufsTer9</td> <td>1 in 60,695 individuals, 0.000008238%</td> </tr> <tr> <td>p.Ser497Ter</td> <td>1 in 60,706 individuals, 0.000008236%</td> </tr> </tbody> </table> <p><i>PTGES3</i></p> <ul style="list-style-type: none"> <li>• pLI = 0.87, may tolerate loss of function variants</li> </ul> | Variant | Frequency | p.Tyr269Ter | 1 in 60,650 individuals, 0.000008245% | Variant | Frequency | p.Trp82Ter | 1 in 60,702 individuals, 0.00001647% | p.Gln101ArgfsTer22 | 1 in 60,702 individuals, 0.00001647% | p.Gln107Ter | 7 in 60,699 individuals, 0.00005766% | p.Ser287Ter | 1 in 60,525 individuals, 0.000008261% | p.Lys372ArgfsTer7 | 1 in 55,933 individuals, 0.000008939% | p.Arg477LysfsTer18 | 1 in 60,666 individuals, 0.000008242% | p.Lys479ArgfsTer20 | 1 in 60,674 individuals, 0.000008241% | p.Lys681SerfsTer16 | 1 in 60,241 individuals, 0.000008300% | Variant | Frequency | p.Lys481GlufsTer9 | 1 in 60,695 individuals, 0.000008238% | p.Ser497Ter | 1 in 60,706 individuals, 0.000008236% |
| Variant            | Frequency                             |                                |                                                                                                                                                                                                                                                                                                                                                                                                                                                                                                                                                                                                                                                                                                                                                                                                                                                                                                                                                                                                                                                                                                                                                                                                                                                                                                                                                                                                                                                                                                                                                                                                                                                                                                                                                                                                                                                                                                                                                                                                                                                                                                                         |         |           |             |                                       |         |           |            |                                      |                    |                                      |             |                                      |             |                                       |                   |                                       |                    |                                       |                    |                                       |                    |                                       |         |           |                   |                                       |             |                                       |
| p.Tyr269Ter        | 1 in 60,650 individuals, 0.000008245% |                                |                                                                                                                                                                                                                                                                                                                                                                                                                                                                                                                                                                                                                                                                                                                                                                                                                                                                                                                                                                                                                                                                                                                                                                                                                                                                                                                                                                                                                                                                                                                                                                                                                                                                                                                                                                                                                                                                                                                                                                                                                                                                                                                         |         |           |             |                                       |         |           |            |                                      |                    |                                      |             |                                      |             |                                       |                   |                                       |                    |                                       |                    |                                       |                    |                                       |         |           |                   |                                       |             |                                       |
| Variant            | Frequency                             |                                |                                                                                                                                                                                                                                                                                                                                                                                                                                                                                                                                                                                                                                                                                                                                                                                                                                                                                                                                                                                                                                                                                                                                                                                                                                                                                                                                                                                                                                                                                                                                                                                                                                                                                                                                                                                                                                                                                                                                                                                                                                                                                                                         |         |           |             |                                       |         |           |            |                                      |                    |                                      |             |                                      |             |                                       |                   |                                       |                    |                                       |                    |                                       |                    |                                       |         |           |                   |                                       |             |                                       |
| p.Trp82Ter         | 1 in 60,702 individuals, 0.00001647%  |                                |                                                                                                                                                                                                                                                                                                                                                                                                                                                                                                                                                                                                                                                                                                                                                                                                                                                                                                                                                                                                                                                                                                                                                                                                                                                                                                                                                                                                                                                                                                                                                                                                                                                                                                                                                                                                                                                                                                                                                                                                                                                                                                                         |         |           |             |                                       |         |           |            |                                      |                    |                                      |             |                                      |             |                                       |                   |                                       |                    |                                       |                    |                                       |                    |                                       |         |           |                   |                                       |             |                                       |
| p.Gln101ArgfsTer22 | 1 in 60,702 individuals, 0.00001647%  |                                |                                                                                                                                                                                                                                                                                                                                                                                                                                                                                                                                                                                                                                                                                                                                                                                                                                                                                                                                                                                                                                                                                                                                                                                                                                                                                                                                                                                                                                                                                                                                                                                                                                                                                                                                                                                                                                                                                                                                                                                                                                                                                                                         |         |           |             |                                       |         |           |            |                                      |                    |                                      |             |                                      |             |                                       |                   |                                       |                    |                                       |                    |                                       |                    |                                       |         |           |                   |                                       |             |                                       |
| p.Gln107Ter        | 7 in 60,699 individuals, 0.00005766%  |                                |                                                                                                                                                                                                                                                                                                                                                                                                                                                                                                                                                                                                                                                                                                                                                                                                                                                                                                                                                                                                                                                                                                                                                                                                                                                                                                                                                                                                                                                                                                                                                                                                                                                                                                                                                                                                                                                                                                                                                                                                                                                                                                                         |         |           |             |                                       |         |           |            |                                      |                    |                                      |             |                                      |             |                                       |                   |                                       |                    |                                       |                    |                                       |                    |                                       |         |           |                   |                                       |             |                                       |
| p.Ser287Ter        | 1 in 60,525 individuals, 0.000008261% |                                |                                                                                                                                                                                                                                                                                                                                                                                                                                                                                                                                                                                                                                                                                                                                                                                                                                                                                                                                                                                                                                                                                                                                                                                                                                                                                                                                                                                                                                                                                                                                                                                                                                                                                                                                                                                                                                                                                                                                                                                                                                                                                                                         |         |           |             |                                       |         |           |            |                                      |                    |                                      |             |                                      |             |                                       |                   |                                       |                    |                                       |                    |                                       |                    |                                       |         |           |                   |                                       |             |                                       |
| p.Lys372ArgfsTer7  | 1 in 55,933 individuals, 0.000008939% |                                |                                                                                                                                                                                                                                                                                                                                                                                                                                                                                                                                                                                                                                                                                                                                                                                                                                                                                                                                                                                                                                                                                                                                                                                                                                                                                                                                                                                                                                                                                                                                                                                                                                                                                                                                                                                                                                                                                                                                                                                                                                                                                                                         |         |           |             |                                       |         |           |            |                                      |                    |                                      |             |                                      |             |                                       |                   |                                       |                    |                                       |                    |                                       |                    |                                       |         |           |                   |                                       |             |                                       |
| p.Arg477LysfsTer18 | 1 in 60,666 individuals, 0.000008242% |                                |                                                                                                                                                                                                                                                                                                                                                                                                                                                                                                                                                                                                                                                                                                                                                                                                                                                                                                                                                                                                                                                                                                                                                                                                                                                                                                                                                                                                                                                                                                                                                                                                                                                                                                                                                                                                                                                                                                                                                                                                                                                                                                                         |         |           |             |                                       |         |           |            |                                      |                    |                                      |             |                                      |             |                                       |                   |                                       |                    |                                       |                    |                                       |                    |                                       |         |           |                   |                                       |             |                                       |
| p.Lys479ArgfsTer20 | 1 in 60,674 individuals, 0.000008241% |                                |                                                                                                                                                                                                                                                                                                                                                                                                                                                                                                                                                                                                                                                                                                                                                                                                                                                                                                                                                                                                                                                                                                                                                                                                                                                                                                                                                                                                                                                                                                                                                                                                                                                                                                                                                                                                                                                                                                                                                                                                                                                                                                                         |         |           |             |                                       |         |           |            |                                      |                    |                                      |             |                                      |             |                                       |                   |                                       |                    |                                       |                    |                                       |                    |                                       |         |           |                   |                                       |             |                                       |
| p.Lys681SerfsTer16 | 1 in 60,241 individuals, 0.000008300% |                                |                                                                                                                                                                                                                                                                                                                                                                                                                                                                                                                                                                                                                                                                                                                                                                                                                                                                                                                                                                                                                                                                                                                                                                                                                                                                                                                                                                                                                                                                                                                                                                                                                                                                                                                                                                                                                                                                                                                                                                                                                                                                                                                         |         |           |             |                                       |         |           |            |                                      |                    |                                      |             |                                      |             |                                       |                   |                                       |                    |                                       |                    |                                       |                    |                                       |         |           |                   |                                       |             |                                       |
| Variant            | Frequency                             |                                |                                                                                                                                                                                                                                                                                                                                                                                                                                                                                                                                                                                                                                                                                                                                                                                                                                                                                                                                                                                                                                                                                                                                                                                                                                                                                                                                                                                                                                                                                                                                                                                                                                                                                                                                                                                                                                                                                                                                                                                                                                                                                                                         |         |           |             |                                       |         |           |            |                                      |                    |                                      |             |                                      |             |                                       |                   |                                       |                    |                                       |                    |                                       |                    |                                       |         |           |                   |                                       |             |                                       |
| p.Lys481GlufsTer9  | 1 in 60,695 individuals, 0.000008238% |                                |                                                                                                                                                                                                                                                                                                                                                                                                                                                                                                                                                                                                                                                                                                                                                                                                                                                                                                                                                                                                                                                                                                                                                                                                                                                                                                                                                                                                                                                                                                                                                                                                                                                                                                                                                                                                                                                                                                                                                                                                                                                                                                                         |         |           |             |                                       |         |           |            |                                      |                    |                                      |             |                                      |             |                                       |                   |                                       |                    |                                       |                    |                                       |                    |                                       |         |           |                   |                                       |             |                                       |
| p.Ser497Ter        | 1 in 60,706 individuals, 0.000008236% |                                |                                                                                                                                                                                                                                                                                                                                                                                                                                                                                                                                                                                                                                                                                                                                                                                                                                                                                                                                                                                                                                                                                                                                                                                                                                                                                                                                                                                                                                                                                                                                                                                                                                                                                                                                                                                                                                                                                                                                                                                                                                                                                                                         |         |           |             |                                       |         |           |            |                                      |                    |                                      |             |                                      |             |                                       |                   |                                       |                    |                                       |                    |                                       |                    |                                       |         |           |                   |                                       |             |                                       |

- 
- 2 heterozygous PTVs, 0 homozygous PTVs
  - 1 variant likely to be a true PTV

---

| <b>Variant</b>    | <b>Frequency</b>                      |
|-------------------|---------------------------------------|
| p.Glu92GlyfsTer34 | 1 in 60,233 individuals, 0.000008301% |

---

*AHSA1*

- 
- pLI = 0.94, extremely intolerant of loss of function variants
  - 7 heterozygous PTVs, 1 homozygous PTV
  - 0 variants likely to be true PTVs

*FKBPS*

- 
- pLI = 0.50, may tolerate loss of function variants
  - 8 heterozygous PTVs, 0 homozygous PTVs
  - 4 variants likely to be true PTVs

---

| <b>Variant</b>     | <b>Frequency</b>                      |
|--------------------|---------------------------------------|
| p.Asn365LysfsTer16 | 1 in 60,537 individuals, 0.000008259% |
| p.Val295AspfsTer20 | 1 in 60,668 individuals, 0.000008242% |
| p.Arg39Ter         | 1 in 60,378 individuals, 0.000008281% |
| p.Arg31GlyfsTer13  | 2 in 60,667 individuals, 0.00001648%  |

---

*PINI*

- 
- pLI = 0.34, may tolerate loss of function variants
  - 4 heterozygous PTVs, 0 homozygous PTVs
  - 0 variants likely to be true PTVs

*STUB1*

- 
- pLI = 0.04, may tolerate loss of function variants
  - 12 heterozygous PTVs, 1 homozygous PTV
  - 5 variants likely to be true PTVs

---

| <b>Variant</b>     | <b>Frequency</b>                      |
|--------------------|---------------------------------------|
| p.Gln78Ter         | 1 in 42,473 individuals, 0.00001177%  |
| p.Trp147Ter        | 1 in 58,268 individuals, 0.000008581% |
| p.Arg182Ter        | 1 in 57,185 individuals, 0.000008744% |
| p.Ile200MetfsTer40 | 1 in 59,604 individuals, 0.000008389% |
| p.Tyr230CysfsTer9  | 1 in 60,065 individuals, 0.000008324% |

---

*CDC37*

- pLI = 0.96, extremely intolerant of loss of function variants
- 4 heterozygous PTVs, 0 homozygous PTVs
- 0 variants likely to be true PTVs

*PPIA*

- pLI = 0.81, may tolerate loss of function variants
- 2 heterozygous PTVs, 0 homozygous PTVs
- 0 variants likely to be true PTVs

*PPP5C*

- pLI = 1.00, extremely intolerant of loss of function variants
- 2 heterozygous PTVs, 0 homozygous PTVs
- 0 variants likely to be true PTVs

*SGTA*

- pLI = 0.47, may tolerate loss of function variants
- 3 heterozygous PTVs, 0 homozygous PTVs
- 0 variants likely to be true PTVs

|        |                  |                      |             |
|--------|------------------|----------------------|-------------|
| gnomAD | Lek et al., 2016 | Controls (n=138,632) | <i>STII</i> |
|--------|------------------|----------------------|-------------|

- 25 heterozygous PTVs, 0 homozygous PTVs
- 4 variants likely to be true PTVs

| Variant            | Frequency                           |
|--------------------|-------------------------------------|
| p.Gln25Ter         | 1 in 123,136 individuals, 4.061e-6% |
| p.Glu138GlyfsTer3  | 1 in 123,133 individuals, 4.061e-6% |
| p.Glu230AlafsTer12 | 1 in 15,484 individuals, 3.229e-5%  |
| p.Tyr269Ter        | 1 in 123,117 individuals, 4.061e-6% |

*HSP90AA1*

- 43 heterozygous PTVs, 0 homozygous PTVs
- 22 variants likely to be true PTVs

| Variant            | Frequency                           |
|--------------------|-------------------------------------|
| p.Pro803SerfsTer6  | 1 in 15,485 individuals, 3.229e-5%  |
| p.Ala772ArgfsTer9  | 1 in 122,978 individuals, 4.066e-6% |
| p.Lys681SerfsTer16 | 1 in 122,842 individuals, 4.07e-6%  |
| p.Ala625SerfsTer2  | 1 in 122,960 individuals, 4.066e-6% |



|                    |                                      |
|--------------------|--------------------------------------|
| p.Glu502Ter        | 1 in 122,976 individuals, 4.066e-6%  |
| p.Cys496Ter        | 1 in 15,493 individuals, 3.227e-5%   |
| p.Lys479ArgfsTer20 | 1 in 123,113 individuals, 4.061e-6%  |
| p.Arg477LysfsTer18 | 2 in 123,115 individuals, 8.122e-6%  |
| p.Glu351Ter        | 1 in 121,447 individuals, 4.117e-6%  |
| p.Ile250TyrfsTer19 | 1 in 122,978 individuals, 4.066e-6%  |
| p.Glu242Ter        | 1 in 122,971 individuals, 4.066e-6%  |
| p.Phe166Ter        | 1 in 123,126 individuals, 4.061e-6%  |
| p.Gln145SerfsTer40 | 1 in 123,126 individuals, 4.061e-6%  |
| p.Glu137AspfsTer17 | 1 in 123,133 individuals, 4.061e-6%  |
| p.Gln128ProfsTer13 | 1 in 123,121 individuals, 4.061e-6%  |
| p.Gln128Ter        | 1 in 15,486 individuals, 3.229e-5%   |
| p.Gln107Ter        | 11 in 123,128 individuals, 4.467e-5% |
| p.Gln107AsnfsTer16 | 1 in 15,486 individuals, 3.229e-5%   |
| p.Gln101ArgfsTer22 | 7 in 138,619 individuals, 2.525e-5%  |
| p.Trp82Ter         | 1 in 123,122 individuals, 4.061e-6%  |
| p.Gly39LeufsTer9   | 1 in 121,701 individuals, 4.108e-6%  |
| p.Asp19ValfsTer25  | 1 in 15,426 individuals, 3.241e-5%   |

*HSP90AB1*

- 14 heterozygous PTVs, 0 homozygous PTVs
- 4 variants likely to be true PTVs

| Variant            | Frequency                           |
|--------------------|-------------------------------------|
| p.Asn100IlefsTer25 | 1 in 123,132 individuals, 4.061e-6% |
| p.Tyr457ArgfsTer2  | 1 in 123,115 individuals, 4.061e-6% |
| p.Lys481GlufsTer9  | 1 in 123,117 individuals, 4.061e-6% |
| p.Ser497Ter        | 1 in 123,135 individuals, 4.061e-6% |

*PTGES3*

- 4 heterozygous PTVs, 0 homozygous PTVs
- 2 variants likely to be true PTVs

| Variant           | Frequency                           |
|-------------------|-------------------------------------|
| p.Glu92GlyfsTer34 | 1 in 105,367 individuals, 4.745e-6% |
| p.Trp86Ter        | 1 in 15,490 individuals, 3.228e-5%  |

*AHSA1*

- 
- 11 heterozygous PTVs, 1 homozygous PTV
  - 0 variants likely to be true PTVs

---

*FKBP5*

- 
- 14 heterozygous PTVs, 0 homozygous PTVs
  - 4 variants likely to be true PTVs

---

| <b>Variant</b>     | <b>Frequency</b>                    |
|--------------------|-------------------------------------|
| p.Val377CysfsTer4  | 1 in 123,103 individuals, 4.062e-6% |
| p.Asn365LysfsTer16 | 1 in 123,062 individuals, 4.063e-6% |
| p.Val295AspfsTer20 | 1 in 123,004 individuals, 4.065e-6% |
| p.Arg39Ter         | 1 in 118,791 individuals, 4.209e-6% |
| p.Arg31GlyfsTer13  | 2 in 123,012 individuals, 8.129e-6% |

---

*PINI*

- 
- 11 heterozygous PTVs, 0 homozygous PTVs
  - 1 variants likely to be a true PTV

---

| <b>Variant</b>    | <b>Frequency</b>                    |
|-------------------|-------------------------------------|
| p.Asn30LysfsTer75 | 1 in 116,440 individuals, 4.294e-6% |

---

*STUB1*

- 
- 17 heterozygous PTVs, 1 homozygous PTV
  - 4 variants likely to be true PTVs

---

| <b>Variant</b>     | <b>Frequency</b>                    |
|--------------------|-------------------------------------|
| p.Trp147Ter        | 1 in 122,320 individuals, 4.088e-6% |
| p.Ile200MetfsTer40 | 1 in 122,657 individuals, 4.076e-6% |
| p.Arg225Ter        | 2 in 137,975 individuals, 7.248e-6% |
| p.Tyr230CysfsTer9  | 2 in 122,785 individuals, 8.144e-6% |

---

*CDC37*

- 
- 15 heterozygous PTVs, 0 homozygous PTVs
  - 2 variants likely to be true PTVs

---

| <b>Variant</b>     | <b>Frequency</b>                    |
|--------------------|-------------------------------------|
| p.Leu292ProfsTer12 | 1 in 121,779 individuals, 4.106e-6% |
| p.Ile10LeufsTer59  | 1 in 122,782 individuals, 4.072e-6% |

---

- PP1A*
- 16 heterozygous PTVs, 0 homozygous PTVs
  - 1 variant likely to be a true PTVs

| Variant          | Frequency                          |
|------------------|------------------------------------|
| c.101-1_101delGA | 2 in 121,215 individuals, 8.25e-6% |

- PPP5C*
- 7 heterozygous PTVs, 0 homozygous PTVs
  - 1 variant likely to be a true PTVs

| Variant    | Frequency                          |
|------------|------------------------------------|
| p.Gln53Ter | 1 in 15,485 individuals, 3.229e-5% |

- SGTA*
- 8 heterozygous PTVs, 0 homozygous PTVs
  - 0 variants likely to be true PTVs

| GWAS Catalog | Study                                       | Cases and controls                                        | Gene            | Notes                                                                                                                                                                                                                           |
|--------------|---------------------------------------------|-----------------------------------------------------------|-----------------|---------------------------------------------------------------------------------------------------------------------------------------------------------------------------------------------------------------------------------|
|              | MacArthur et al., 2017<br>Mick et al., 2011 | Cases and controls<br>(n=341 cases from 339 trios)        | <i>ST11</i>     | <ul style="list-style-type: none"> <li>• Intron variant, rs11607165-G trending towards association with ADHD (<math>P</math>-value <math>4 \times 10^{-6}</math>)</li> <li>• Association not replicated</li> </ul>              |
|              | McGue et al., 2013                          | Cases and controls<br>(n=7,188)                           | <i>HSP90AA1</i> | <ul style="list-style-type: none"> <li>• Intron variant, rs1190596-A trending towards association with nicotine use (<math>P</math>-value <math>4 \times 10^{-6}</math>)</li> <li>• Association not replicated</li> </ul>       |
|              | Astle et al., 2016                          | Cases and controls<br>(n=172,433)                         | <i>HSP90AB1</i> | <ul style="list-style-type: none"> <li>• Downstream variant, rs62401155-A may be associated with mean corpuscular volume (<math>P</math>-value <math>6 \times 10^{-11}</math>)</li> <li>• Association not replicated</li> </ul> |
|              | Gieger et al., 2011                         | Cases and controls (n=66,867 individuals from 36 studies) | <i>PTGES3</i>   | <ul style="list-style-type: none"> <li>• Downstream variant, rs2950390-C may be associated with mean platelet volume (<math>P</math>-value <math>7.45 \times 10^{-14}</math>)</li> </ul>                                        |

|                       |                                |                                                                                                                                                                                                                                                                                                                                                                                                                                                                                                                                               |              |
|-----------------------|--------------------------------|-----------------------------------------------------------------------------------------------------------------------------------------------------------------------------------------------------------------------------------------------------------------------------------------------------------------------------------------------------------------------------------------------------------------------------------------------------------------------------------------------------------------------------------------------|--------------|
|                       |                                | <ul style="list-style-type: none"> <li>• Downstream variant, rs941207-G may be associated with platelet count (<math>P</math>-value <math>2 \times 10^{-10}</math>)</li> <li>• Associations not replicated</li> </ul>                                                                                                                                                                                                                                                                                                                         |              |
|                       |                                | • No association reported                                                                                                                                                                                                                                                                                                                                                                                                                                                                                                                     | <i>AHSA1</i> |
| Astle et al., 2016    | Cases and controls (n=172,435) |                                                                                                                                                                                                                                                                                                                                                                                                                                                                                                                                               | <i>FKBP5</i> |
|                       |                                | <ul style="list-style-type: none"> <li>• Intron variant, rs7760951-C may be associated with eosinophil percentage of white cells (<math>P</math>-value <math>1 \times 10^{-11}</math>)</li> <li>• Intron variant, rs7760951-C may be associated with white blood cell count (<math>P</math>-value <math>1 \times 10^{-11}</math>)</li> <li>• Intron variant, rs7760951-C may be associated with eosinophil percentage of granulocytes (<math>P</math>-value <math>1 \times 10^{-10}</math>)</li> <li>• Associations not replicated</li> </ul> |              |
| Gottlieb et al., 2014 | Cases and controls (n=47,180)  |                                                                                                                                                                                                                                                                                                                                                                                                                                                                                                                                               | <i>PINI</i>  |
|                       |                                | <ul style="list-style-type: none"> <li>• 3'UTR variant, rs2287838 may be associated with sleep duration (<math>P</math>-value <math>1 \times 10^{-7}</math>)</li> <li>• Association not replicated</li> </ul>                                                                                                                                                                                                                                                                                                                                 |              |
|                       |                                | • No association reported                                                                                                                                                                                                                                                                                                                                                                                                                                                                                                                     | <i>STUB1</i> |
|                       |                                | • No association reported                                                                                                                                                                                                                                                                                                                                                                                                                                                                                                                     | <i>CDC37</i> |
|                       |                                | • No association reported                                                                                                                                                                                                                                                                                                                                                                                                                                                                                                                     | <i>PPIA</i>  |
| Astle et al., 2016    | Cases and controls (n=172,435) |                                                                                                                                                                                                                                                                                                                                                                                                                                                                                                                                               | <i>PPP5C</i> |
|                       |                                | <ul style="list-style-type: none"> <li>• Synonymous variant, rs61747094-A may be associated with basophil percentage of white cells (<math>P</math>-value <math>2 \times 10^{-9}</math>)</li> <li>• Association not replicated</li> </ul>                                                                                                                                                                                                                                                                                                     |              |
|                       |                                |                                                                                                                                                                                                                                                                                                                                                                                                                                                                                                                                               | <i>SGTA</i>  |

- No association reported

| ClinVar | Landrum et al., 2016 | Cases (n=519,321 submissions)             | <i>STII</i>                                                                                                                                                                                                                                                                                                                                                                                                                                                                                                                                                |
|---------|----------------------|-------------------------------------------|------------------------------------------------------------------------------------------------------------------------------------------------------------------------------------------------------------------------------------------------------------------------------------------------------------------------------------------------------------------------------------------------------------------------------------------------------------------------------------------------------------------------------------------------------------|
|         | Miller et al., 2010  | Cases (n=21,698 patients from 33 studies) | <ul style="list-style-type: none"> <li>• Copy number gain in 11p15.5-q25; and loss in 11q12.3-13.1 (&gt;1000 genes implicated in some cases) in patients with abnormal morphology and developmental disabilities.</li> <li>• Copy number gain and loss are classified as 'pathogenic' or 'likely pathogenic'.</li> <li>• No variants in only <i>STII</i>.</li> </ul>                                                                                                                                                                                       |
|         |                      |                                           | <i>HSP90AA1</i>                                                                                                                                                                                                                                                                                                                                                                                                                                                                                                                                            |
|         | Miller et al., 2010  | Cases (n=21,698 patients from 33 studies) | <ul style="list-style-type: none"> <li>• Copy number gain in 14q11.2-32.33, 14q24.2-32.33, 14q23.2-32.33, 14q32.2-32.33, 14q32.12-32.33, 14q24.3-32.33, 14q31.3-32.33, 14q31.2-32.33; and loss in 14q32.2-32.33, 14q32.31-32.33, 14q32.2-32.31, 14q32.13-32.33 (&gt;1000 genes implicated in some cases) in patients with abnormal developmental delay and/or other significant developmental or morphological phenotypes.</li> <li>• Copy number gain and loss are classified as 'pathogenic'.</li> <li>• No variants in only <i>HSP90AA1</i>.</li> </ul> |
|         |                      |                                           | <i>HSP90AB1</i>                                                                                                                                                                                                                                                                                                                                                                                                                                                                                                                                            |
|         | Miller et al., 2010  | Cases (n=21,698 patients from 33 studies) | <ul style="list-style-type: none"> <li>• Copy number gain in 6p25.3-q27, 6p25.3-12.3; and loss in 6p21.1-12.3, 6p21.2-12.3 (&gt;100 genes implicated in some cases) in patients with short stature, abnormality of cardiovascular system morphology, abnormality of the ear, polydactyly, developmental delay and/or other significant developmental or morphological phenotypes.</li> <li>• Copy number gain and loss are classified as 'pathogenic'.</li> <li>• No variants in only <i>HSP90AB1</i>.</li> </ul>                                          |
|         |                      |                                           | <i>PTGES3</i>                                                                                                                                                                                                                                                                                                                                                                                                                                                                                                                                              |
|         | Miller et al., 2010  | Cases (n=21,698 patients from 33 studies) | <ul style="list-style-type: none"> <li>• Copy number gain in 12p13.33-q24.33 (&gt;1000 genes implicated in some cases) in patients with short stature, abnormality of cardiovascular system morphology, abnormality of the ear, and/or polydactyly.</li> </ul>                                                                                                                                                                                                                                                                                             |

|                     |                                           |                                                                                                                                                                                                                                                                                                                                                                                                                                                                                                                                                                                                                           |
|---------------------|-------------------------------------------|---------------------------------------------------------------------------------------------------------------------------------------------------------------------------------------------------------------------------------------------------------------------------------------------------------------------------------------------------------------------------------------------------------------------------------------------------------------------------------------------------------------------------------------------------------------------------------------------------------------------------|
|                     |                                           | <ul style="list-style-type: none"> <li>• Copy number gain is classified as ‘pathogenic’.</li> <li>• No variants in only <i>PTGES3</i>.</li> </ul>                                                                                                                                                                                                                                                                                                                                                                                                                                                                         |
|                     |                                           | <i>AHSA1</i>                                                                                                                                                                                                                                                                                                                                                                                                                                                                                                                                                                                                              |
| Miller et al., 2010 | Cases (n=21,698 patients from 33 studies) | <ul style="list-style-type: none"> <li>• Copy number gain in 14q11.2-32.33, 14q24.2-32.33, 14q23.2-32.33, 14q24.3-32.33; and loss in 14q24.2-24.3, 14q24.3-31.1, 14q24.1-31.1, 14q24.3 (&gt;1000 genes implicated in some cases) in patients with short stature, abnormality of cardiovascular system morphology, abnormality of the ear, polydactyly, laryngotracheomalacia, muscular hypotonia, and/or other significant developmental or morphological phenotypes.</li> <li>• Copy number gain and loss are classified as ‘pathogenic’ or ‘likely pathogenic’.</li> <li>• No variants in only <i>AHSA1</i>.</li> </ul> |
|                     |                                           | <i>FKBP5</i>                                                                                                                                                                                                                                                                                                                                                                                                                                                                                                                                                                                                              |
| Miller et al., 2010 | Cases (n=21,698 patients from 33 studies) | <ul style="list-style-type: none"> <li>• Copy number gain in 6p25.3-q27, 6p25.3-12.3 (&gt;1000 genes implicated in some cases) in patients with short stature, abnormality of cardiovascular system morphology, abnormality of the ear, polydactyly, and/or other significant developmental or morphological phenotypes.</li> <li>• Copy number gain are classified as ‘pathogenic’.</li> <li>• No variants in only <i>FKBP5</i>.</li> </ul>                                                                                                                                                                              |
|                     |                                           | <i>PINI</i>                                                                                                                                                                                                                                                                                                                                                                                                                                                                                                                                                                                                               |
| Miller et al., 2010 | Cases (n=21,698 patients from 33 studies) | <ul style="list-style-type: none"> <li>• Copy number gain in 19p13.3-q13.43, 19p13.2-13.12, 19p13.2; and loss in 19p13.2 (&gt;1000 genes implicated in some cases) in patients with short stature, abnormality of cardiovascular system morphology, abnormality of the ear, polydactyly, and/or global developmental delay.</li> <li>• Copy number gain are classified as ‘pathogenic’ or ‘likely pathogenic’.</li> <li>• No variants in only <i>PINI</i>.</li> </ul>                                                                                                                                                     |
|                     |                                           | <i>STUB1</i>                                                                                                                                                                                                                                                                                                                                                                                                                                                                                                                                                                                                              |
| Miller et al., 2010 | Cases (n=21,698 patients from 33 studies) | <ul style="list-style-type: none"> <li>• Copy number gain in 16p13.3-13.2, 16p13.3, 16p13.3-12.2, 16p13.3-q24.3, 16p13.3-12.3, 16p13.3-13.2, 16p13.3-11.2, 16p13.3-13.11, 16p13.3-13.12,</li> </ul>                                                                                                                                                                                                                                                                                                                                                                                                                       |

|                                                                                       |                                                                                          |                                                                                                                                                                                                                                                                                                                                                                                                                                                                                                                                                                          |
|---------------------------------------------------------------------------------------|------------------------------------------------------------------------------------------|--------------------------------------------------------------------------------------------------------------------------------------------------------------------------------------------------------------------------------------------------------------------------------------------------------------------------------------------------------------------------------------------------------------------------------------------------------------------------------------------------------------------------------------------------------------------------|
|                                                                                       |                                                                                          | 16p13.3-13.13; and loss in 16p13.3 (>200 genes implicated in some cases) in patients with significant developmental or morphological phenotypes.                                                                                                                                                                                                                                                                                                                                                                                                                         |
|                                                                                       |                                                                                          | <ul style="list-style-type: none"> <li>• Copy number gain and loss are classified as ‘pathogenic’ or ‘likely pathogenic’.</li> </ul>                                                                                                                                                                                                                                                                                                                                                                                                                                     |
| Heimdal et al., 2014<br>Synofzik et al., 2014<br>Shi et al., 2013<br>Shi et al., 2014 | 2 families, 4 patients<br>300 patients<br>3 families, 6 patients<br>1 family, 2 patients | <ul style="list-style-type: none"> <li>• 12 variants in <i>STUB1</i>, classified as ‘pathogenic’ or ‘likely pathogenic’ associated with autosomal recessive spinocerebellar ataxia: p.Asn65Ser, p.Ala79Thr, p.Ala79Asp, p.Leu123Val, p.Asn130Ile, p.Trp147Cys, p.Leu165Phe, p.Ser216Phefs, p.Cys232_Gly233del, p.Met240Thr, p.Arg241Gly, and p.Thr246Met.</li> </ul>                                                                                                                                                                                                     |
| <i>CDC37</i>                                                                          |                                                                                          |                                                                                                                                                                                                                                                                                                                                                                                                                                                                                                                                                                          |
| Miller et al., 2010                                                                   | Cases (n=21,698 patients from 33 studies)                                                | <ul style="list-style-type: none"> <li>• Copy number gain in 19p13.3-q13.43, 19p13.2-13.12, 19p13.2-13.13; and loss in 19p13.2 (&gt;30 genes implicated in some cases) in patients with short stature, abnormality of cardiovascular system morphology, abnormality of the ear, polydactyly, and/or global developmental delay.</li> <li>• Copy number gain are classified as ‘pathogenic’ or ‘likely pathogenic’.</li> <li>• No variants in only <i>CDC37</i>.</li> </ul>                                                                                               |
| <i>PPIA</i>                                                                           |                                                                                          |                                                                                                                                                                                                                                                                                                                                                                                                                                                                                                                                                                          |
| Miller et al., 2010                                                                   | Cases (n=21,698 patients from 33 studies)                                                | <ul style="list-style-type: none"> <li>• Copy number gain in 7p22.3-q36.3, 7p21.3-12.1, 7p14-q11.21 and loss in 7p22.3-q36.3, 7p14.1-12.3, 7p14.1-13, 7p14.1-12.1, 7p14.1-11.2, 7p13-12.1, 7p13-12.3 (&gt;200 genes implicated in some cases) in patients with micrognathia, ventricular septal defect, abnormal facial shape, syndactyly, intrauterine growth retardation, intellectual disability, macrocephaly, and/or global developmental delay.</li> <li>• Copy number gain are classified as ‘pathogenic’.</li> <li>• No variants in only <i>PPIA</i>.</li> </ul> |
| <i>PPP5C</i>                                                                          |                                                                                          |                                                                                                                                                                                                                                                                                                                                                                                                                                                                                                                                                                          |
| Miller et al., 2010                                                                   | Cases (n=21,698 patients from 33 studies)                                                | <ul style="list-style-type: none"> <li>• Copy number gain in 19p13.3-q13.43, 19q13.32; and loss in 19q13.32-13.33, 19q13.2-13.32, 19q13.32 (&gt;40 genes implicated in some cases) in patients with short stature, abnormality of cardiovascular system morphology, abnormality of the ear, polydactyly, dyslexia, anxiety, and/or tremor.</li> </ul>                                                                                                                                                                                                                    |

|          |                     |                                           |                                                                                                                                                                                                                                                                                                                                                                                                                                                                                                                         |
|----------|---------------------|-------------------------------------------|-------------------------------------------------------------------------------------------------------------------------------------------------------------------------------------------------------------------------------------------------------------------------------------------------------------------------------------------------------------------------------------------------------------------------------------------------------------------------------------------------------------------------|
|          |                     |                                           | <ul style="list-style-type: none"> <li>• Copy number gain are classified as ‘pathogenic’ or ‘likely pathogenic’.</li> <li>• No variants in only <i>PPP5C</i>.</li> </ul>                                                                                                                                                                                                                                                                                                                                                |
|          |                     |                                           | <i>SGTA</i>                                                                                                                                                                                                                                                                                                                                                                                                                                                                                                             |
|          | Miller et al., 2010 | Cases (n=21,698 patients from 33 studies) | <ul style="list-style-type: none"> <li>• Copy number gain in 19p13.3-q13.43, 19p13.3, 19p13.3-13.2; and loss in 19p13.3 (&gt;90 genes implicated in some cases) in patients with short stature, abnormality of cardiovascular system morphology, abnormality of the ear, polydactyly, developmental delay and/or other significant developmental or morphological phenotypes.</li> <li>• Copy number gain are classified as ‘pathogenic’ or ‘likely pathogenic’.</li> <li>• No variants in only <i>SGTA</i>.</li> </ul> |
| DECIPHER | Firth et al., 2009  | Cases (n=24,999 patient records)          | <i>STII</i>                                                                                                                                                                                                                                                                                                                                                                                                                                                                                                             |
|          |                     | Cases (n= 6)                              | <ul style="list-style-type: none"> <li>• Copy number gain in 11q12.2-13.1, 11p11.2-q25; and loss in 11q12.3-13.1, 11p15.5-q25 (&gt;1500 genes implicated in some cases) in patients with abnormal morphological phenotypes and/or developmental delay.</li> <li>• Copy number gain and loss are classified as ‘pathogenic’ or ‘likely pathogenic’.</li> <li>• No variants in only <i>STII</i>.</li> </ul>                                                                                                               |
|          |                     | Cases (n=17)                              | <i>HSP90AA1</i>                                                                                                                                                                                                                                                                                                                                                                                                                                                                                                         |
|          |                     |                                           | <ul style="list-style-type: none"> <li>• Copy number gain in 14q32.11-32.33, 14q32.31-32.32, 14q32.13-32.33, 14q32.12-32.33; and loss in 14q32.1-32.33, 14q32.2-32.33, 14q32.31-32.33 (&gt;400 genes implicated in some cases) in patients with abnormal morphological phenotypes and/or global developmental delay.</li> <li>• Copy number gain and loss are classified as ‘pathogenic’ or ‘likely pathogenic’.</li> <li>• No variants in only <i>HSP90AA1</i>.</li> </ul>                                             |
|          |                     |                                           | <i>HSP90AB1</i>                                                                                                                                                                                                                                                                                                                                                                                                                                                                                                         |



---

|               |                                                                                                                                                                                                                                                                                                                                                                                                                                                                                                                                     |
|---------------|-------------------------------------------------------------------------------------------------------------------------------------------------------------------------------------------------------------------------------------------------------------------------------------------------------------------------------------------------------------------------------------------------------------------------------------------------------------------------------------------------------------------------------------|
| Cases (n=4)   | <ul style="list-style-type: none"><li>• Copy number gain in 6p25.3-q13; and loss in 6p21.2-21.1, 6p21.1-12.3 (&gt;30 genes implicated in some cases) in patients with abnormal morphological phenotypes and/or global developmental delay.</li><li>• Copy number gain and loss are classified as ‘likely pathogenic’.</li><li>• No variants in only <i>HSP90AB1</i>.</li></ul>                                                                                                                                                      |
| <i>PTGES3</i> |                                                                                                                                                                                                                                                                                                                                                                                                                                                                                                                                     |
| Cases (n=4)   | <ul style="list-style-type: none"><li>• Copy number gain in 12q13.13-14.3, and loss in 12p13.31-q24.33 (&gt;180 genes implicated in some cases) in patients with abnormal facial shape and global developmental delay.</li><li>• Copy number gain and loss are classified as ‘pathogenic’ or ‘likely pathogenic’.</li><li>• No variants in only <i>PTGES3</i>.</li></ul>                                                                                                                                                            |
| <i>AHSA1</i>  |                                                                                                                                                                                                                                                                                                                                                                                                                                                                                                                                     |
|               | <ul style="list-style-type: none"><li>• No association with classifications as ‘pathogenic’ or ‘likely pathogenic’ reported.</li></ul>                                                                                                                                                                                                                                                                                                                                                                                              |
| <i>FKBP5</i>  |                                                                                                                                                                                                                                                                                                                                                                                                                                                                                                                                     |
| Cases (n=2)   | <ul style="list-style-type: none"><li>• Copy number gain in 6p25.3-q13 (&gt;900 genes implicated in some cases). Patient phenotype not reported.</li><li>• Copy number gain is classified as ‘likely pathogenic’.</li><li>• No variants in only <i>FKBP5</i>.</li></ul>                                                                                                                                                                                                                                                             |
| <i>PINI</i>   |                                                                                                                                                                                                                                                                                                                                                                                                                                                                                                                                     |
| Cases (n=1)   | <ul style="list-style-type: none"><li>• Copy number loss in 19p13.2 (&gt;100 genes implicated) in patients with abnormality of the nasolacrimal system, ankyloglossia, atria septal defect, behavioral abnormality, brachydactyly syndrome, hypospadias, intellectual disability, low hanging columella, microdontia, prominent nasal bridge, sacral dimple, single transverse palmar crease, and sleep disturbance.</li><li>• Copy number loss is classified as ‘pathogenic’.</li><li>• No variants in only <i>PINI</i>.</li></ul> |

---

---

---

| <i>STUB1</i> |                                                                                                                                                                                                                                                                                                                                                                                                                                       |
|--------------|---------------------------------------------------------------------------------------------------------------------------------------------------------------------------------------------------------------------------------------------------------------------------------------------------------------------------------------------------------------------------------------------------------------------------------------|
| Cases (n=14) | <ul style="list-style-type: none"><li>• Copy number gain in 16p13.3-13.2, 16p13.3-13.11, 16p13.3, and loss in 16p13.3 (&gt;50 genes implicated in some cases) in patients with morphological abnormalities, learning disability, obesity, autism, and/or global developmental delay.</li><li>• Copy number gain and loss are classified as ‘pathogenic’ or ‘likely pathogenic’.</li><li>• No variants in only <i>STUB1</i>.</li></ul> |

---

---

| <i>CDC37</i> |                                                                                                                                                                                                                                                                                                                                                                                                                                                                                                                                                    |
|--------------|----------------------------------------------------------------------------------------------------------------------------------------------------------------------------------------------------------------------------------------------------------------------------------------------------------------------------------------------------------------------------------------------------------------------------------------------------------------------------------------------------------------------------------------------------|
| Cases (n=1)  | <ul style="list-style-type: none"><li>• Copy number loss in 19p13.2 (&gt;100 genes implicated in some cases) in patients with abnormality of the nasolacrimal system, ankyloglossia, atria septal defect, behavioral abnormality, brachydactyly syndrome, hypospadias, intellectual disability, low hanging columella, microdontia, prominent nasal bridge, sacral dimple, single transverse palmar crease, and sleep disturbance.</li><li>• Copy number loss is classified as ‘pathogenic’.</li><li>• No variants in only <i>CDC37</i>.</li></ul> |

---

---

| <i>PPIA</i> |                                                                                                                                                                                                                                                                                                                                                                                                                                       |
|-------------|---------------------------------------------------------------------------------------------------------------------------------------------------------------------------------------------------------------------------------------------------------------------------------------------------------------------------------------------------------------------------------------------------------------------------------------|
| Cases (n=4) | <ul style="list-style-type: none"><li>• Copy number gain in 7p14.1-q11.22, loss in 7p15.3-11.2, 7p14.3-12.3, 7p14.1-11.2 (&gt;90 genes implicated in some cases) in patients with morphological abnormalities and/or intellectual disability. Phenotypes not reported for 2 patients.</li><li>• Copy number gain and loss are classified as ‘pathogenic’ or ‘likely pathogenic’.</li><li>• No variants in only <i>PPIA</i>.</li></ul> |

---

---

| <i>PPP5C</i> |                                                                                                                                                                                                                                                  |
|--------------|--------------------------------------------------------------------------------------------------------------------------------------------------------------------------------------------------------------------------------------------------|
| Cases (n=1)  | <ul style="list-style-type: none"><li>• Copy number loss in 19q13.31-13.32 (&gt;60 genes implicated) in patients with bipolar affective disorder, broad-based gait, cataract, intellectual disability, mild, seizures, and short nose.</li></ul> |

---

---

---

|             |                                                                                                                                                                                                                                                                                                                                                                                |
|-------------|--------------------------------------------------------------------------------------------------------------------------------------------------------------------------------------------------------------------------------------------------------------------------------------------------------------------------------------------------------------------------------|
|             | <ul style="list-style-type: none"><li>• Copy number loss is classified as ‘pathogenic’.</li><li>• No variants in only <i>PPP5C</i>.</li></ul>                                                                                                                                                                                                                                  |
|             |                                                                                                                                                                                                                                                                                                                                                                                |
|             | <i>SGTA</i>                                                                                                                                                                                                                                                                                                                                                                    |
| Cases (n=8) | <ul style="list-style-type: none"><li>• Copy number gain in 19p13.3-13.2, 19p13.3, and loss in 19p13.3 (&gt;40 genes implicated in some cases) in patients with morphological abnormalities and/or global developmental delay.</li><li>• Copy number gain and loss are classified as ‘pathogenic’ or ‘likely pathogenic’.</li><li>• No variants in only <i>SGTA</i>.</li></ul> |

---

Abbreviations are as follows: ExAC, Exome Aggregation Consortium; gnomAD, Genome Aggregation Database; GWAS, genome-wide association study; DECIPHER, DatabasE of genomiC variation and Phenotype in Humans using Ensembl Resources; PTV, protein truncating variant; these types of genetic variants typically cause the gene to lose its intended function unless they are within the last exon of the gene, and are likely to escape non-sense mediated decay. pLI, probability of loss of function intolerance score. A pLI score >0.9 indicates loss of function in a given gene is not tolerated. Controls are referred to individuals who are part of public databases that are controls for the majority of studies; cases are referred to individuals who were ascertained for a specific disease. Importantly, not all controls are healthy; however, they do not have a Mendelian disease.
